## **Ask1 and Akt act synergistically to promote ROS-dependent regeneration in *Drosophila***

Paula Santabàrbara-Ruiz<sup>1, # &</sup>, José Esteban-Collado<sup>1 &</sup>, Lidia Pérez<sup>2</sup>, Giacomo Viola<sup>1</sup>, Marco Milán<sup>2, 3</sup>, Montserrat Corominas<sup>1, 3</sup>, and Florenci Serras<sup>1\*</sup>

<sup>1</sup> Department of Genetics, Microbiology and Statistics, School of Biology and Institute of Biomedicine of the University of Barcelona (IBUB), University of Barcelona, Barcelona, Spain.

<sup>2</sup> Institute for Research in Biomedicine (IRB Barcelona), The Barcelona Institute of Science and Technology, Baldiri Reixac, 10-12, 08028 Barcelona, Spain

<sup>3</sup> Institució Catalana de Recerca i Estudis Avançats (ICREA), Pg. Lluís Companys 23, 08010 Barcelona, Spain

# Current address: Institute of Biology Valrose, CNRS UMR7277, Inserm U1091, UNS Université Nice Sophia Antipolis, Nice, France

\* Corresponding author

E-mail: fserras@ub.edu

&These authors contributed equally to this work

## **Abstract**

The mechanism by which apoptotic cells release signals that induce undamaged neighbor cells to proliferate and regenerate missing parts remains elusive. Oxidative stress originated by dying or damaged cells can be propagated to neighboring cells, which then promote regeneration. We investigated the nature of the stress sensing mechanism by which neighboring cells are recruited. We found that *Drosophila* apoptosis signal-regulating kinase 1 (Ask1) senses reactive oxygen species (ROS) differently in stressed dying cells and unstressed neighboring cells and this differential sensing is pivotal for tissue repair. In undamaged cells, this activity is attenuated, but not abolished, by Akt1 phosphorylation, which thus acts as a survival signal that results in the tolerable levels of p38 and JNK necessary for regeneration. These observations demonstrate that the non-autonomous activation of the ROS-sensing mechanism by Ask1 and Akt1 in neighboring unstressed cells. Collectively, these results provide the basis for understanding the molecular mechanism of communication between dying and living cells that triggers regeneration.

## **Author summary**

One of the early events that occur after tissue damage is oxidative stress production that signals to initiate wound healing and regeneration. Several signaling pathways, such as JNK and p38, respond to oxidative stress and are necessary for regeneration. We decided to explore the mechanism that links the oxidative stress and the activation of these pathways. We used epithelia of *Drosophila* to genetically direct cell death in specific zones of the tissue as means of experimentally controlled cell damage. We found that the Ask1 protein, which is sensitive to oxidative stress, is a key player in this scenario. Actually it acts as an intracellular sensor that upon damage activates those signaling pathways. However, high activity of Ask1 can be toxic for the cell. This is controlled by Akt, an enzyme downstream the insulin pathway, with attenuates the activity of Ask1 to tolerable levels. In conclusion, Ask1 and Akt act synergistically to respond to the stress generated after tissue damage and drive regeneration. In other words, we found that the link between oxidative stress and nutrition is key for tissue regeneration.

## Introduction

Organisms are continuously exposed to a wide variety of environmental stressors that cause deterioration and cell death. Tissues overcome the effect of stressors by replacing or repairing damaged cells. Understanding the early signals that initiate the response to damage is an essential issue in regenerative biology. Compiling evidence supports that reactive oxygen species (ROS) fuel wound healing and oxygen-dependent redox-sensitive signaling processes involved in damage response [1,2].

Regeneration can be studied in *Drosophila* imaginal discs, which are epithelial sacs of the larvae, via genetic ablation of specific zones and then monitoring the mechanism of recovery by surviving cells [3]. Genetically induced apoptosis in the wing imaginal discs leads to production of ROS which propagate to surviving neighbors [4–6]. Although oxidative stress has been associated with several pathologies, low levels of ROS can be beneficial for signal transduction [7].

Jun-N Terminal kinase (JNK) and p38 are MAP kinases that respond to many stressors, including ROS, and foster tissue repair and regeneration in *Drosophila* [4,5,15–24,6,8–14]. Both signaling pathways control many cellular processes as disparate as cell proliferation and cell death. For example, ectopic activation of JNK induces apoptosis [25,26], but its inhibition results in lethality [27]. These disparities could be due to either different levels of activity or different mechanisms of activation.

Two different scenarios have been found after genetic ablation in the wing imaginal disc: (1) apoptotic cells show high concentration of ROS and high activity of JNK in the absence of p38 activity; and (2) the neighboring unstressed living cells show tolerable levels of ROS needed to trigger the low activity of JNK and the activation of p38 necessary for tissue regeneration [4]. A key question is how the balance between the beneficial or detrimental effects of ROS is controlled and, in particular, how ROS control JNK and p38 activity. A candidate molecule to perform this function is the MAPKKK Apoptosis signal-regulating kinase 1 (Ask1) which responds to various stresses by phosphorylation of JNK and p38 pathways [28–30]. Hence, in a reduced environment, thioredoxin (Trx) inhibits Ask1 kinase activity by directly binding to the N-terminal region of Ask1. Upon oxidative stress, the redox-sensitive cysteines of Trx become oxidized, resulting in the dissociation of Trx from Ask1. Consequently, Ask1 is oligomerized and its threonine-rich kinase domain is phosphorylated, inducing Ask1 activation [31,32]. Mammalian Ask1 is highly sensitive to oxidative stress and contributes substantially to JNK-dependent apoptosis. Nevertheless, recent studies have also revealed other functions of this kinase, including cell differentiation and survival [28,33].

Ask1-interacting proteins promote conformational changes that lead to the modulation of Ask1 activity and result in various cellular responses. For example, Akt1, a kinase activated by Pi3K pathway in response to insulin receptor activation, phosphorylates Ask1 and mitigates its activity *in vitro* [34].

In this work, we used wing imaginal discs, which encompass high regenerative capacity [3], to explore the link between ROS and regeneration. We found that Ask1 acts as a sensor of ROS upstream the JNK and p38 and that Akt1 is necessary for modulating Ask1 activity in undamaged regenerating cells. Together, our results indicate that oxidative stress generated in the damaged cells signals the neighboring undamaged cells to promote tissue repair.

## Results

The Gal4/UAS/Gal80<sup>TS</sup> transactivation system is a key tool that allows us to activate, temporarily and in a spatially controlled manner, pro-apoptotic genes such as *reaper* (*rpr*) [9,10,18]. To determine if *Drosophila Ask1* is involved in regeneration, we first induced cell death in the wing disc using the wing-specific *sal<sup>E/Pv</sup>-Gal4* strain to activate *UAS-rpr* (henceforth *sal<sup>E/Pv</sup>>rpr*) in *Ask1* mutant backgrounds and then scored regeneration defects in adult wings. We found that in *Ask1<sup>MB06487</sup>* or *Ask1<sup>M102915</sup>* heterozygous individuals, full regeneration of the wings dropped to 15% and 23%, respectively, in comparison to wild-type backgrounds (Fig. 1A). In addition, we used a double transactivation system to simultaneously express *rpr* in the *sal<sup>E/Pv</sup>* domain and the RNAi of *Ask1* in an adjacent compartment (Fig. 1B). The *UAS-Ask1<sup>RNAi</sup>* transgene was activated in the anterior compartment using the Gal4-UAS system (*ci-Gal4 UAS-Ask1<sup>RNAi</sup>*) and cell death was induced in the *sal<sup>E/Pv</sup>* domain using the Gal80-repressible transactivator system LHG, a modified form of the *lexA lexO* system (*sal<sup>E/Pv</sup>-LHG lexO-rpr*) (Fig. 1B) [4,35]. The resulting wings (*ci>Ask1<sup>RNAi</sup> sal<sup>E/Pv</sup>>rpr*) lacked some veins or interveins and their size was reduced. In the absence of cell death (*sal<sup>E/Pv</sup>> OFF* in Fig.1B), *Ask1<sup>RNAi</sup>* wings were normal. Driving *UAS-Ask1<sup>RNAi</sup>* to a different compartment (dorsal) and inducing cell death in *sal<sup>E/Pv</sup>* (*ap>Ask1<sup>RNAi</sup> sal<sup>E/Pv</sup>>rpr*) resulted in anomalies in 82% of wings. To evaluate whether these anomalies were due to impairment of the regenerative growth, we analyzed the mitotic index, calculated as the number of cells positive for the phosphorylated form of Histone 3 (P-H3) in the anterior compartment, where control and *Ask1<sup>RNAi</sup>* transgenes were expressed. We found an increase of mitosis in *sal<sup>E/Pv</sup>>rpr* discs, compared to the *sal<sup>E/Pv</sup>>GFP ci>RFP* or *sal<sup>E/Pv</sup>>GFP ci>Ask1<sup>RNAi</sup>* controls. However, this increase in the anterior compartment

mitosis associated to damage, was blocked in *ci>Ask1<sup>RNAi</sup>* discs (Fig.1C), confirming that Ask1 reduction impairs regenerative growth.

The *Drosophila Ask1* locus encodes two peptides of different lengths, Ask1-RB and Ask1-RC, with predicted molecular weights of 136.5 kDa and 155.5 kDa, respectively. Both have a protein kinase-like domain that contains a highly conserved core of threonines conferring functionality on the protein [28]. The longer Ask1-RC isoform contains a conserved domain of unknown function DUF4071 (Fig. 2A) in which, in mammals, phosphorylation of the Ser83 results in attenuation of Ask1 activity in vitro [34]. Active Ask1 can be traced with antibodies against the phosphorylated threonine residues of the highly conserved kinase domain (henceforth P-Thr) and the attenuated form with specific antibodies against phosphorylated Ser83 (P-Ser83). We first tested both antibodies in wild-type wing imaginal discs. We detected low levels of P-Thr all over the disc including some transient high activity during mitosis (Fig. 2B and S1A Fig.), as occurs in mammalian cells [36]. We also found low levels of P-Ser83 in wild-type control discs (Fig. 2C). Both the general low and the high mitotic-associated activity of P-Thr as well as the low endogenous P-Ser83 levels, were abolished in *Ask1* mutant backgrounds (S1B, C Fig.).

However, upon apoptosis, high levels of P-Thr were localized in dying cells (Fig. 2D) and absent or, in some cases, very weakly incremented above the basal levels in nearby living cells. This increment of P-Thr in apoptotic cells was abolished after *Ask1<sup>RNAi</sup>* expression (Fig. 2E). In contrast, P-Ser83 accumulated in living cells adjoining the apoptotic zone and was absent in apoptotic cells. The increase in P-Ser83 varied from discs with strong accumulation near the dying domain to those with an extended increase in the whole wing pouch (Fig. 2D and S2A Fig.). Similar results were obtained after killing cells with a different pro-apoptotic gene (*sal<sup>EPV</sup>>hid*) (S2B Fig.). In the presence of apoptosis and blocking *Ask1*, the P-Ser83 increment in living cells was inhibited (Fig. 2F). P-Ser83 was also found to be elevated at the wound edges after physical injury (S2C Fig.). Together, these observations indicate that neighboring cells respond to damage by phosphorylation of Ask1 Ser83.

In contrast to the high activity of Ask1 in dying cells (high P-Thr), the presence of P-Ser83 in living cells could be indicative of tolerable levels of Ask1 achieved by attenuation of P-Thr activity. To test this hypothesis, we mutated *Ask1* at serine 83 to alanine and cloned it into a UAS vector (*UAS-Ask1<sup>S83A</sup>*). In parallel, we also cloned a wild-type form of Ask1 (*UAS-Ask1<sup>WT</sup>*). The ectopic expression of *Ask1<sup>WT</sup>* resulted in an increase of P-Ser83 in addition to low levels of P-Thr (Fig. 2G). Interestingly, the expression of *Ask1<sup>S83A</sup>*, which did not show a rise in P-Ser83, resulted in high levels of

P-Thr (Fig. 2H). This observation concurs with the P-Ser83 residue as responsible for the attenuation of P-Thr.

We also analyzed whether the Ser83 residue is key for damage response. Using the double transactivation system, we found that the expression of *UAS-Ask1<sup>WT</sup>* or *UAS-Ask1<sup>S83A</sup>* transgenes caused no effects in the absence of stressed tissue (Fig. 2I). Upon apoptosis, expression of *UAS-Ask1<sup>WT</sup>* resulted in normal regeneration in 89% of wings. In contrast, expression of *UAS-Ask1<sup>S83A</sup>* led to a fall to only 29% of individuals being capable of regenerating and the rest showed strong effects on veins and interveins, as well as the appearance of notches, which together are indicative of disrupted regeneration (Fig. 2I). The suppression of the ability to regenerate by *UAS-Ask1<sup>S83A</sup>*, which may act as a dominant negative allele, is likely due to the lack of non-autonomous P-Ser83 increment in these cells.

Next, we decided to identify the upstream signal responsible for Ser83 phosphorylation. In mammalian cells, phosphorylation of Ask1 at Ser83 is driven by the serine-threonine Akt kinase, a key signaling molecule in the insulin pathway [34]. We wondered whether the *Drosophila* Akt1 as well as the Pi3K92E kinase (the *Drosophila* Pi3K kinase also known as dp110), were required for P-Ser83 activity. We first found that the active phosphorylated form of Akt (P-Akt) was increased in the living tissue and decreased or was absent in the dying zone (Fig 3A-C). This suggests that Akt1 functions in surviving cells. To test whether the Akt1 phosphorylated the endogenous Akt1 Ser83, we used an RNAi for *Akt1* and found that P-Ser83 was absent (Fig. 3D, E). In addition, ectopic activation of Akt1 (*UAS-myr-Akt1.S*) [37] resulted in an increase in the levels of P-Ser83 (Fig. 3F, G).

We also studied the role of P-Akt on Ask1 in the context of regeneration. We found that the dominant negative form of *Pi3K92E* (*dp110<sup>DN</sup>*) blocked the accumulation of P-Akt and P-Ser83 induced after genetic ablation (Fig. 3H-J), but not the P-Thr in dying cells (Fig. 3K and S3 Fig.). We also scored the effects on wing regeneration after blocking the Akt pathway. We observed impaired regeneration when the dominant negative form of *Pi3K92E* was expressed in the anterior compartment (*ci>dp110<sup>DN</sup>*) as well as in the *Akt1<sup>1</sup>* heterozygous background, an allele that encodes a catalytically inactive protein [38] (Fig. 3L). Moreover, regeneration was severely affected in double heterozygous flies containing *Akt1<sup>1</sup>* and *Ask1<sup>MB06487</sup>* or *Ask1<sup>MI02915</sup>* alleles (Fig. 3L). Neither the dominant negative form of *Pi3K92E* nor the allelic combination *Akt1<sup>1</sup>* and *Ask1<sup>MB06487</sup>* or *Ask1<sup>MI02915</sup>* affected wing development in the absence of cell death (*sal<sup>E/Pv</sup>>* OFF wings in Fig. 3L). These results further support the notion that Pi3K92E/Akt1 and Ask1 genetically interact and that their activity is key in driving regeneration.

Next, to test whether Ask1 activation is ROS-dependent, we fed *sal<sup>E/Pv</sup>>rpr* larvae with food supplemented with N-acetyl cysteine (NAC), a potent non-enzymatic scavenger that decreases ROS production, and examined Ask1 phosphorylation (Fig. 4A). After induction of cell death, we found a significant decrease in both P-Thr and P-Ser83 in discs of the NAC-fed larvae (Fig. 4B,C). In addition, we fed larvae with H<sub>2</sub>O<sub>2</sub>-supplemented food and observed a significant increase in both P-Thr and P-Ser83 levels (Fig. 4D-F). This oxidative stress-induced increase was partially blocked in the hypomorphic *Ask1<sup>MB06487</sup>* homozygous mutant (Fig. 4E, F). It is known that in mammalian cells Ask1 can also be activated by endoplasmic reticulum (ER) stress [39]. Feeding larvae with tunicamycin, an inhibitor of N-glycosylation in the ER that induces ER stress, led to an increase in Ask1 activation, which was also blocked in *Ask1<sup>MB06487</sup>* mutant discs (Fig. 4E, F).

Furthermore, we wondered whether Akt1 activation in the unstressed living cells is targeted by ROS from the dying cells. To examine this hypothesis, we enzymatically blocked ROS production using ectopic expression of the ROS scavengers *Superoxide dismutase 1* and *Catalase (Sod1:Cat)* in the *rpr* ablated zone. Remarkably, we found that activation of P-Akt was reduced when *Sod1:Cat* was co-expressed with *rpr* in the same zone (Fig. 4G). Accordingly, we found that the increment of P-Ser83 in neighboring cells was blocked when *Sod1:Cat* was co-expressed with *rpr* (Fig. 4G). These results demonstrate that the oxidative stress generated from the dying cells targets the Pi3K/Akt1 and Ask1 in the neighboring undamaged tissue.

We have shown that the Ask1 P-Ser83 attenuating signal is essential for regeneration, and that this signal depends on ROS and Akt. We next hypothesized that this P-Ser83-mediated attenuation does not silence Ask1, but instead maintains the low levels of Ask1 activity necessary for regeneration. Therefore we analyzed the expression of its known targets, the stress-activated MAP kinases JNK and p38 [40,41], both required for ROS-dependent regeneration [4–6]. We blocked *Ask1* in the anterior compartment and used the posterior as an internal control for the same disc (*ci>Ask1<sup>RNAi</sup> sal<sup>E/Pv</sup>>rpr*) and found most phosphorylated p38 (P-p38), as an indicator of p38 activity, in the posterior compartment (Fig. 5A, B). The effects of Ask1 on JNK activity were monitored by matrix metalloproteinase 1 (Mmp1) expression as a read-out of the pathway [42]. After cell death, Mmp1 was found in both compartments, but in *ci>Ask1<sup>RNAi</sup> sal<sup>E/Pv</sup>>rpr* discs Mmp1 levels dropped in the anterior (Fig. 5C, D). We also analyzed whether *Ask1* was required for activation of p38 and JNK after physical damage. We made two incisions in the same disc, one in the *UAS-Ask1<sup>RNAi</sup>* compartment and another into the control compartment. We found that P-p38 localized at the wound edges in the control compartment, whereas the levels of P-p38 were

reduced at the wound edges of the *Ask1<sup>RNAi</sup>* compartment (Fig. 5E, G). Likewise, cut *Ask1<sup>RNAi</sup>* discs resulted in less Mmp1 than in the control compartment (Fig. 5F, H).

## Discussion

We have shown here that Ask1 acts as a sensor of ROS after damage, and that synergizes with Pi3K/Akt1 to phosphorylate the Ask1 P-Ser83, a key phosphorylation event to initiate regeneration. In addition, we demonstrated that the activation of the Pi3K/Akt1 and Ask1 in undamaged cells is originated by ROS produced by the damaged tissue.

An essential question to understand regeneration is how damaged cells communicate to the nearby surviving cells to initiate regeneration. One of the most classical and determining studies on epithelial regeneration was the discovery that massive cell death induced with ionizing radiation in *Drosophila* larvae results in proliferation of the unharmed neighbors to compensate the lost [43]. Since then, compensatory proliferation, a cellular response linked to regeneration, has been considered as a result of signals released from apoptotic cells [44]. We propose here that the oxidative stress generated by damaged or apoptotic cells signals undamaged tissue to ignite the Ask1/Akt1 machinery that will culminate with repair and compensatory proliferation.

ROS acting in signaling after wounding has been subject of extensive research in various organisms and tissues [4,5,52–56,6,45–51]. Here, we have uncovered two scenarios of Ask1 activity: high activity in apoptotic cells, with high levels of P-Thr; and low activity in undamaged cells, where P-Ser83 prevails over P-Thr. This fits with the high levels of ROS and JNK in dying cells and the low levels of ROS, low JNK and P-p38 in undamaged cells reported previously [4]. Together, our observations address the question of how JNK signaling selectively fosters apoptosis or proliferation, and how this signal is related to high or low ROS levels (Fig. 5I). The same applies to p38, which is only activated in unharmed cells when neighbors enter apoptosis or are damaged [4,57]. Our study demonstrates that Ask1 operates in an Akt1-dependent manner in living cells and in an Akt1-independent manner in dying cells (Fig. 5I). In addition, it is conceivable that Akt1-mediated attenuation delivers either low or transient levels of Ask1 activity to stimulate P-p38 and low JNK levels necessary for tissue regeneration. In contrast, apoptotic cells induce high or sustained levels of JNK, either because of the amplification loop of apoptosis triggered by JNK [58] or because high levels of ROS result in high Ask1 P-Thr in the absence of Pi3K/Akt1 attenuation. We conclude that oxidative stress and the absence or presence of Pi3K/Akt1 survival



signals are integrated in Ask1 to control the selective activity of JNK and p38, and in turn regenerative growth.

## Materials and Methods

### *Drosophila* strains

The *Drosophila melanogaster* strains *sal<sup>E/PV</sup>-Gal4*, *tubGal80<sup>TS</sup>*, *UAS-rpr*, *sal<sup>E/PV</sup>-LHG* and *lexO-rpr*, are previously described elsewhere [4]. *Ask1<sup>MB06487</sup>* [59] *Ask1<sup>MI02915</sup>* [60], *Akt1<sup>1</sup>* [38], *ptc-Gal4*, *sal-Gal4*, *ci-Gal4*, *ap-Gal4*, *en-Gal4*, *hh-Gal4*, *UAS-hid*, *UAS-GFP*, *UAS-RFP*, *dpp-Gal4*, *hh-Gal4*, *UAS-dp110<sup>DN</sup>* (D954A), *Df(3R)BSC636* (25726), *UAS-Sod.A* (*Sod1*), *UAS-Cat.A*, and *UAS-Ask1<sup>RNAi</sup>* (35331) were obtained from the Bloomington Stock Center. *UAS-Akt<sup>RNAi</sup>* (2902) was taken from the Vienna Drosophila Resource Center (VDRC). We used the *UAS-myr-Akt1.S*, a constitutively activated membrane-anchored form of *Akt1* [37] Canton S and *w<sup>118</sup>* were used as controls.

The *Ask1<sup>MB06487</sup>* mutant is viable in homozygosis and shows transcription after a RT-PCR (results not shown). The *Ask1<sup>MI02915</sup>* mutant is lethal in homozygosis as well as over the *Df(3R)BSC636*.

### Generation of *UAS-Ask1<sup>WT</sup>* and *UAS-Ask1<sup>S83A</sup>* flies

pUAS<sub>attb</sub>\_Ask1<sup>WT</sup> was constructed by cutting Ask1 cDNA EcoRI /BamHI from DGRC clone FI02066 and cloning it into pUAS<sub>attb</sub>.

pUAS<sub>attb</sub>\_Ask1<sup>S83A</sup>. Two serines in the 75 and 83 residues in the DUF4071 domain showed putative non-canonical AKT phosphorylation sites (ILTQQRPLSYHYHLGVRESF). Both residues are spatially exposed similarly to human Ser83 of ASK1, which makes them accessible to kinases. As the AKT kinase phosphorylates the Ser83 of human ASK1 and attenuates the activity of ASK1 *in vitro* (Kim et al. 2001), we decided to mutate this residue and clone it into a UAS vector. pUAS<sub>attb</sub>\_Ask1 S83A was constructed by mutating serine 83 to alanine by PCR using oligos Ask1Mut-Fwd and Ask1S83A-Rev for partial PCR1 and Ask1S83A-Fwd and Ask1Mut-Rev for partial PCR2. Complete PCR was performed using the two partial PCRs as templates with oligos Ask1Mut-Fwd and Ask1Mut-Rev. The complete PCR was then cut with EcoRI /PflMI and cloned into FI02066-cut EcoRI/PflMI. The mutation introduced a new StuI site that was used to check the mutated clones. Mutated Ask1S83A cDNA was then cut from EcoRI/BamHI and cloned into pUAS<sub>attb</sub>. Both clones were injected by standard procedures in line zh-86Fb-attP and transgenic lines were selected.

Ask1Mut-Fwd: AAT ACA AGA AGA GAA CTC TGA ATA CGG AAT

Ask1Mut-rev: CGG CGG TGT GGT TTT GTG CAC AAA CCG ATC

Ask1S83A-Fwd: CGT TAG GGA GGC CTT CGG GAT GAA GGA GA

Ask1S83A-Rev: CGG CGG TGT GGT TTT GTG CAC AAA CCG ATC

### **Genetic ablation and dual Gal4/LexA transactivation system**

Cell death was genetically induced as previously described [18,19]. We used the *sal<sup>E/Pv</sup>-Gal4* as a driver, which consists of *spalt* wing enhancer with expression confined to the wing [61] to score adult wing parameters. The UAS line used to promote cell death was *UAS-rpr* or *UAS-hid*, controlled by the thermo-sensitive Gal4 repressor *tubGal80<sup>TS</sup>*. We also used the *sal<sup>E/Pv</sup>-LHG* and *LexO-rpr* strains [4] for genetic ablation, utilizing the same design as for Gal4/UAS.

Embryos were kept at 17°C until the 8th day/192 hours after egg laying to prevent *rpr* expression. They were subsequently moved to 29°C for 11 hours and then back to 17°C to allow tissue to regenerate. Two types of controls were always treated in parallel; individuals without *rpr* expression (*UAS-GFP*, moved to 29°C for 11 hours) and individuals kept continuously at 17°C to avoid any transgene activation

In dual transactivation experiments, we used *sal<sup>E/Pv</sup>-LHG LexO-rpr* to ablate the *sal<sup>E/Pv</sup>* domain (abridged as *sal<sup>E/Pv</sup>>rpr*), whereas Gal4 was used to express different transgenes under the control of Gal4 drivers (*ci-Gal4* for anterior compartment; *ap-Gal4* for dorsal compartment and *hh-Gal4* for posterior compartment).

### **Test for regenerated adult wings and statistics**

To test the capacity of different genetic backgrounds to regenerate, we used adult wings emerged from *sal<sup>E/Pv</sup>>rpr* individuals in which patterning and size defects can be scored easily. Flies were fixed in glycerol:ethanol (1:2) for 24 hours. Wings were dissected in water and then washed with ethanol. Subsequently, they were mounted in lactic acid:ethanol (6:5) and analyzed and imaged under a microscope.

The percentage of normal wings refers to normally regenerated or developed wings and was calculated according to the number of wings with a complete set of veins and interveins, as markers of normal patterning. For each sample, we scored the percentage of individuals belonging to the “normal wings” class and calculated the standard error of the sample proportion based on a binomial distribution (regenerated complete wing or not)  $SE = \sqrt{p(1-p)/n}$ , where *p* is the proportion of successes in the population.

### **Immunochemistry**

Immunostaining was performed using standard protocols. The primary antibodies used in this study were Ask1 P-Ser83 (Santa Cruz Biotechnology sc-101633 1:100, which recognizes the conserved region surrounding human P-Ser83), Ask1 P-Thr (Santa Cruz Biotechnology sc-109911 1:100, which labels the preserved region nearby mouse P-Thr845), Ptc (DSHB, 1:100), P-p38 (Cell Signalling 1:50), Mmp1 (cocktail of three antibodies: DSHB 3A6B4, 5H7B11, 3B8D12 1:100), P-Akt (S473 Cell Signalling 1:100) and P-Histone-H3 (Millipore, 1:1000). Fluorescently labeled secondary antibodies were obtained from ThermoFisher Scientific. Discs were mounted in SlowFade or ProLong (ThermoFisher Scientific) supplemented with 1  $\mu$ M TO-PRO-3 (TP-3) to label nuclei. For apoptotic cell detection, we used the TUNEL assay. We employed the fluorescently labeled Alexa Fluor® 647-aha-dUTP (ThermoFisher Scientific), incorporated using terminal deoxynucleotidyl transferase (Roche).

The number of mitotic cells per  $\mu\text{m}^2$  (Fig 1C) was calculated after counting the number of P-Histone-H3 (P-H3) positive cells in the anterior compartment of the wing pouch and hinge for all the genotypes shown. The number of mitosis after analyzing the stacks of confocal images was calculated using Fiji software.

### **Imaginal disc culture and physical injury**

Wing discs were dissected from third instar larvae in Schneider's insect medium (Sigma-Aldrich), and a small fragment was removed with tungsten needles. To visualize Mmp1 staining, the discs were cultured in Schneider's insect medium supplemented with 2% heat-activated fetal calf serum, 2.5% fly extract and 5  $\mu$ g/ml insulin, for 5 hours at 25°C. For P-p38, discs were injured in Schneider's insect medium and immediately fixed and stained. *Ex vivo* images were taken using a Leica SPE confocal microscope and processed with Fiji software.

### **ROS scavenging**

To prevent ROS production in *sal<sup>E/Pv</sup>>rpr* discs we pursued two different protocols. First, we inhibited ROS chemically (Fig 4A-F). To do this, standard fly food was supplemented with the antioxidant N-acetyl cysteine (NAC) (100  $\mu$ g/ml) (Sigma-Aldrich). NAC treatment was dispensed on the 7<sup>th</sup> day of development at 17°C. On the 8<sup>th</sup> day, experimental larvae were moved to 29°C for 11 hours to promote cell death, whereas controls were transferred to a vial with standard food and moved to 29°C for the same time period. Afterward, the larvae were move back to 17°C to allow tissue recovery. Second, we decreased ROS production genetically by the ectopic expression of the Sod1 and Catalase enzymes using a recombinant fly *UAS-Sod1:UAS-Cat*

(*Sod1:Cat*) in the *sal<sup>E/Pv</sup>>rpr* domain. For those experiments, *Sod1:Cat* and *rpr* were activated for 24 hours at 29°C

### Oxidative stress induction

Third instar larvae were transferred to vials with 5mL of special medium containing 1.3% UltraPure™ LMP agarose (Invitrogen), 5% sucrose (Fluka) and the desired concentration of 0.1% H<sub>2</sub>O<sub>2</sub> (Merck) or 1ng/μl tunicamycin (Sigma-Aldrich). To avoid loss of oxidative capacity, these substances were added to the media at a temperature below 45°C. The larvae were fed for 2 hours prior to dissection and fixation of the discs. Controls without H<sub>2</sub>O<sub>2</sub> or tunicamycin were always handled in parallel.

### Genotypes

#### Figure 1.

(A) *+/+* → *wUAS-rpr/+; sal<sup>E/Pv</sup>-Gal4/+; tubGal80<sup>TS</sup>/+*  
*Ask1<sup>MI02915</sup>/+* → *wUAS-rpr/+; sal<sup>E/Pv</sup>-Gal4/+; tubGal80<sup>TS</sup>/Ask1<sup>MI02915</sup>*  
*Ask1<sup>MB06487</sup>/+* → *wUAS-rpr/+; sal<sup>E/Pv</sup>-Gal4/+; tubGal80<sup>TS</sup>/Ask1<sup>MB06487</sup>*

(B) *sal<sup>E/Pv</sup>>rpr* → *w; ci-Gal4/LexO-rpr; sal<sup>E/Pv</sup>-LHG:tubGal80<sup>TS</sup>/UAS-GFP*  
*ci>Ask1<sup>RNAi</sup>* → *w; ci-Gal4/LexO-GFP; sal<sup>E/Pv</sup>-LHG:tubGal80<sup>TS</sup>/*  
*UAS-Ask1<sup>RNAi</sup>*  
*sal<sup>E/Pv</sup>>rpr ci> Ask1<sup>RNAi</sup>* → *w; ci-Gal4/LexO-rpr; sal<sup>E/Pv</sup>-LHG:tubGal80<sup>TS</sup>/*  
*UAS- Ask1<sup>RNAi</sup>*  
*ap> Ask1<sup>RNAi</sup>* → *w; ap-Gal4/LexO-GFP; sal<sup>E/Pv</sup>-LHG:tubGal80<sup>TS</sup>/*  
*UAS- Ask1<sup>RNAi</sup>*  
*sal<sup>E/Pv</sup>>rpr ap> Ask1<sup>RNAi</sup>* → *w; ap-Gal4/LexO-rpr; sal<sup>E/Pv</sup>-LHG:tubGal80<sup>TS</sup>/*  
*UAS- Ask1<sup>RNAi</sup>*

(C, D) *sal>GFP ci>RFP* → *w; ci-Gal4/LexO-GFP; sal<sup>E/Pv</sup>-LHG:tubGal80<sup>TS</sup>/UAS-RFP*  
*sal>GFP ci>Ask1<sup>RNAi</sup>* → *w; ci-Gal4/LexO-GFP; sal<sup>E/Pv</sup>-LHG:tubGal80<sup>TS</sup>/*  
*UAS-Ask1<sup>RNAi</sup>*  
*sal<sup>E/Pv</sup>>rpr ci>GFP* → *w; ci-Gal4/LexO-rpr; sal<sup>E/Pv</sup>-LHG:tubGal80<sup>TS</sup>/UAS-GFP*  
*sal<sup>E/Pv</sup>>rpr ci> Ask1<sup>RNAi</sup>* → *w; ci-Gal4/LexO-rpr; sal<sup>E/Pv</sup>-LHG:tubGal80<sup>TS</sup>/*  
*UAS- Ask1<sup>RNAi</sup>*

#### Figure 2.

(B,C) *WT* → Canton S  
(D) *sal<sup>E/Pv</sup>>rpr* → *wUAS-rpr/+; sal<sup>E/Pv</sup>-Gal4/+; tubGal80<sup>TS</sup>/+*  
(E,F) *sal<sup>E/Pv</sup>>rpr ci> Ask1<sup>RNAi</sup>* → *w; ci-Gal4/LexO-rpr; sal<sup>E/Pv</sup>-LHG:tubGal80<sup>TS</sup>/*

UAS- Ask1<sup>RNAi</sup>  
 (G) hh>Ask1<sup>WT</sup>, GFP → w; UAS-GFP/+; hh-Gal4/UAS- Ask1<sup>WT</sup>  
 (H) hh>Ask1<sup>S83A</sup>, GFP → w; UAS-GFP/+; hh-Gal4/UAS- Ask1<sup>S83A</sup>  
 (I) sal>GFP ci>Ask1<sup>WT</sup> → w; ci-Gal4/LexO-GFP; sal<sup>E/Pv</sup>-LHG:tubGal80<sup>TS</sup>/UAS- Ask1<sup>WT</sup>  
sal>GFP ci>Ask1<sup>S83A</sup> → w; ci-Gal4/LexO-GFP; sal<sup>E/Pv</sup>-LHG:tubGal80<sup>TS</sup>/  
 UAS- Ask1<sup>S83A</sup>  
sal<sup>E/Pv</sup>>rpr → w; ci-Gal4/LexO-rpr; sal<sup>E/Pv</sup>-LHG:tubGal80<sup>TS</sup>/UAS-GFP  
sal<sup>E/Pv</sup>>rpr ci> Ask1<sup>WT</sup> → w; ci-Gal4/LexO-rpr; sal<sup>E/Pv</sup>-LHG:tubGal80<sup>TS</sup>/  
 UAS- Ask1<sup>WT</sup>  
sal<sup>E/Pv</sup>>rpr ci> Ask1<sup>S83A</sup> → w; ci-Gal4/LexO-rpr; sal<sup>E/Pv</sup>-LHG:tubGal80<sup>TS</sup>/  
 UAS- Ask1<sup>S83A</sup>

### Figure 3.

A) Canton S

(B) ptc>rpr → wUAS-rpr/+; ptc-Gal4: tubGal80<sup>TS</sup> /+  
 (C) sal>rpr → wUAS-rpr/+; sal-Gal4/+; tubGal80<sup>TS</sup>/+  
 (D,E) ptc>Akt<sup>RNAi</sup> → w; ptc-Gal4:tubGal80<sup>TS</sup>/+; UAS-Akt<sup>RNAi</sup>/+  
 (F,G) ptc>myrAkt → w; ptc-Gal4:tubGal80<sup>TS</sup>/+; UAS-myrAkt/+  
 (H-K) sal<sup>E/Pv</sup>>rpr hh>dp110<sup>DN</sup> → w; LexO-rpr /UAS-dp110<sup>DN</sup>; sal<sup>E/Pv</sup>-LHG:tubGal80<sup>TS</sup>/hh-  
 Gal4  
 (L) ci>dp110<sup>DN</sup> → w; ci-Gal4/UAS-dp110<sup>DN</sup>; sal<sup>E/Pv</sup>-LHG:tubGal80<sup>TS</sup>/+  
 +/+ → w; LexO-rpr/ +; sal<sup>E/Pv</sup>-LHG:tubGal80<sup>TS</sup>/+ (control for LexO-rpr in the second  
 chromosome) and wUASrpr/+; sal<sup>E/Pv</sup>-Gal4; tubGal80<sup>TS</sup> (control for mutant  
 backgrounds)  
sal<sup>E/Pv</sup>>rpr ci>dp110<sup>DN</sup> → w; ci-Gal4/UAS-dp110<sup>DN</sup>; sal<sup>E/Pv</sup>-LHG:tubGal80<sup>TS</sup>/ LexO-rpr  
sal<sup>E/Pv</sup>>rpr Akt<sup>1/+</sup> → wUAS-rpr/+; sal<sup>E/Pv</sup>-Gal4; tubGal80<sup>TS</sup>; Akt<sup>1/+</sup>  
sal<sup>E/Pv</sup>>rpr Ask1<sup>MB06487/+</sup> Akt<sup>1/+</sup> → wUAS-rpr/+; sal<sup>E/Pv</sup>-Gal4; tubGal80<sup>TS</sup>; Akt<sup>1</sup>/Ask1<sup>MB06487</sup>  
sal<sup>E/Pv</sup>>rpr Ask1<sup>MI02915/+</sup> Akt<sup>1/+</sup> → wUAS-rpr/+; sal<sup>E/Pv</sup>-Gal4; tubGal80<sup>TS</sup>; Akt<sup>1</sup>/Ask1<sup>MI02915</sup>

### Figure 4.

(B,C) Std food and NAC → wUAS-rpr/+; sal<sup>E/Pv</sup>-Gal4/+; tubGal80<sup>TS</sup>/+  
 (E,F) CTRL → w<sup>118</sup>; +; +  
Ask1<sup>-/-</sup> → w<sup>118</sup>; +; Ask1<sup>MB06487</sup>/Ask1<sup>MB06487</sup>  
 (G) sal>rpr, GFP → w; sal<sup>E/Pv</sup>-Gal4/UAS-GFP; tubGal80<sup>TS</sup>/UAS-rpr  
sal>rpr, Sod1:Cat → w; sal<sup>E/Pv</sup>-Gal4/UAS-Sod1:UAS-Cat; tubGal80<sup>TS</sup>/UAS-rpr

### Figure 5.

(A,C)  $sal^{E/Pv} > rpr \rightarrow w$ ;  $LexO-rpr/+$ ;  $sal^{E/Pv}-LHG:tubGal80^{TS}/+$

(B,D)  $sal^{E/Pv} > rpr \text{ ci} > Ask1^{RNAi} \rightarrow w$ ;  $ci-Gal4/LexO-rpr$ ;  $sal^{E/Pv}-LHG:tubGal80^{TS}/$   
 $UAS-Ask1^{RNAi}$

(E-H)  $en > Ask1^{RNAi}, GFP \rightarrow w$ ;  $en-Gal4/UAS-GFP$ ;  $UAS-Ask1^{RNAi} /+$

### S1 Figure.

(A)  $w^{118}, +; +$

(B)  $Ask1^+/Ask1^+ \rightarrow w^{118}, +; +$

$Ask1^{MB06487}/Ask1^{MB0647} \rightarrow w^{118}, +; +$ ;  $Ask1^{MB06487}/Ask1^{MB06487}$

$Ask1^{MB06487}/Def(3R)BSC636 \rightarrow w^{118}, +; +$ ;  $Ask1^{MB06487}/Def(3R)BSC636$

(C)  $hh > Ask1^{RNAi}, GFP \rightarrow w$ ;  $UAS-GFP/+$ ;  $hh-Gal4/UAS-Ask1^{RNAi}$

### S2 Figure.

(A)  $wt$  and  $ptc > rpr \rightarrow wUAS-rpr/+$ ;  $ptc-Gal4: tubGal80^{TS} /+$

$sal^{E/Pv} > hid \rightarrow w$ ;  $sal^{E/Pv}-Gal4/+$ ;  $tubGal80^{TS}/UAS-hid$

$wt$  and physically injured  $\rightarrow$  Canton S

### S3 Figure.

(A-D)  $ci > dp110^{DN} \rightarrow w$ ;  $ci-Gal4/UAS-dp110^{DN}$ ;  $sal^{E/Pv}-LHG:tubGal80^{TS} / LexO-rpr$

### Acknowledgments

We thank Josep F. Abril, Irene Martínez and Irene Pardo for their help during the initial stages of this work. We thank Hugo Stocker for helpful discussions and providing reagents. We also thank Marta Morey, Haritz Plazaola, Qui Zhu, Alejandra Fernández and Elena Vizcaya for discussions. Stocks obtained from the Bloomington Drosophila Stock Center (NIH P40OD018537) were used in this study. We thank the Genomics Resource Center, supported by NIH grant 2P40OD010949, for the Ask1 clone. We also thank Manel Bosch at the confocal facility of the Scientific and Technological Centers (CCiT) of the University of Barcelona for his help. This project was funded by the Spanish Ministerio de Economía y Competitividad, Spain grant BFU2015- 67623-P to FS and MC and by grant BFU2016-77587-P to M.M.'s lab.

## References

1. Sen CK, Roy S. Redox signals in wound healing. *Biochim Biophys Acta*. 2008;1780: 1348–61. doi:10.1016/j.bbagen.2008.01.006
2. Veal EA, Day AM, Morgan BA. Hydrogen peroxide sensing and signaling. *Mol Cell*. 2007;26: 1–14. doi:10.1016/j.molcel.2007.03.016
3. Hariharan IK, Serras F. Imaginal disc regeneration takes flight. *Curr Opin Cell Biol*. 2017;48: 10–16. doi:10.1016/j.ceb.2017.03.005
4. Santabábara-Ruiz P, López-Santillán M, Martínez-Rodríguez I, Binagui-Casas A, Pérez L, Milán M, et al. ROS-Induced JNK and p38 Signaling Is Required for Unpaired Cytokine Activation during *Drosophila* Regeneration. *PLoS Genet*. 2015;11. doi:10.1371/journal.pgen.1005595
5. Fogarty CE, Diwanji N, Lindblad JL, Tare M, Amcheslavsky A, Makhijani K, et al. Extracellular Reactive Oxygen Species Drive Apoptosis-Induced Proliferation via *Drosophila* Macrophages. *Curr Biol*. 2016; doi:10.1016/j.cub.2015.12.064
6. Khan SJ, Abidi SNF, Skinner A, Tian Y, Smith-Bolton RK. The *Drosophila* Duox maturation factor is a key component of a positive feedback loop that sustains regeneration signaling. *PLoS Genet*. 2017;13. doi:10.1371/journal.pgen.1006937
7. Finkel T. Signal transduction by reactive oxygen species. *J Cell Biol*. 2011;194: 7–15. doi:10.1083/jcb.201102095
8. Lee N, Maurange C, Ringrose L, Paro R. Suppression of Polycomb group proteins by JNK signalling induces transdetermination in *Drosophila* imaginal discs. *Nature*. 2005;438: 234–237. doi:nature04120 [pii] 10.1038/nature04120
9. Herrera SC, Martin R, Morata G. Tissue homeostasis in the wing disc of *Drosophila melanogaster*: immediate response to massive damage during development. *PLoS Genet*. 2013;9: e1003446. doi:10.1371/journal.pgen.1003446; 10.1371/journal.pgen.1003446
10. Smith-Bolton RK, Worley MI, Kanda H, Hariharan IK. Regenerative growth in *Drosophila* imaginal discs is regulated by Wingless and Myc. *Dev Cell*. 2009;16: 797–809. doi:10.1016/j.devcel.2009.04.015
11. Ryoo HD, Gorenc T, Steller H. Apoptotic cells can induce compensatory cell proliferation through the JNK and the Wingless signaling pathways. *Dev Cell*. 2004;7: 491–501. doi:S1534580704003247 [pii] 10.1016/j.devcel.2004.08.019
12. Bosch M, Serras F, Martin-Blanco E, Baguna J, Martín-Blanco E, Baguña J. JNK signaling pathway required for wound healing in regenerating *Drosophila* wing imaginal discs. *Dev Biol*. 2005;280: 73–86. doi:S0012-1606(05)00003-5 [pii] 10.1016/j.ydbio.2005.01.002
13. Mattila J, Omelyanchuk L, Kytälä S, Turunen H, Nokkala S. Role of Jun N-terminal Kinase (JNK) signaling in the wound healing and regeneration of a *Drosophila melanogaster* wing imaginal disc. *Int J Dev Biol*. 2005;49: 391–399. doi:052006jm [pii] 10.1387/ijdb.052006jm
14. Pastor-Pareja JC, Wu M, Xu T. An innate immune response of blood cells to



- tumors and tissue damage in *Drosophila*. *Dis Model Mech*. 2008;1: 144–154. doi:10.1242/dmm.000950
15. Fan Y, Wang S, Hernandez J, Yenigun VB, Hertlein G, Fogarty CE, et al. Genetic models of apoptosis-induced proliferation decipher activation of JNK and identify a requirement of EGFR signaling for tissue regenerative responses in *Drosophila*. *PLoS Genet*. Public Library of Science; 2014;10: e1004131. doi:10.1371/journal.pgen.1004131
  16. Galko MJ, Krasnow MA. Cellular and genetic analysis of wound healing in *Drosophila* larvae. *PLoS Biol*. 2004;2: E239. doi:10.1371/journal.pbio.0020239
  17. Harris RE, Setiawan L, Saul J, Hariharan IK. Localized epigenetic silencing of a damage-activated WNT enhancer limits regeneration in mature *Drosophila* imaginal discs. *Elife*. 2016;5. doi:10.7554/eLife.11588
  18. Bergantiños C, Corominas M, Serras F. Cell death-induced regeneration in wing imaginal discs requires JNK signalling. *Development*. 2010;137: 1169–1179. doi:10.1242/dev.045559 [pii]
  19. Repiso A, Bergantiños C, Serras F. Cell fate respecification and cell division orientation drive intercalary regeneration in *Drosophila* wing discs. *Dev*. 2013;140. doi:10.1242/dev.095760
  20. Seisenbacher G, Hafen E, Stocker H. MK2-dependent p38b signalling protects *Drosophila* hindgut enterocytes against JNK-induced apoptosis under chronic stress. *PLoS Genet*. 2011;7: e1002168. doi:10.1371/journal.pgen.1002168
  21. Chakrabarti S, Poidevin M, Lemaitre B. The *Drosophila* MAPK p38c regulates oxidative stress and lipid homeostasis in the intestine. *PLoS Genet*. Public Library of Science; 2014;10: e1004659. doi:10.1371/journal.pgen.1004659
  22. Craig CR, Fink JL, Yagi Y, Ip YT, Cagan RL. A *Drosophila* p38 orthologue is required for environmental stress responses. *EMBO Rep*. 2004;5: 1058–63. doi:10.1038/sj.embor.7400282
  23. Vrailas-Mortimer A, del Rivero T, Mukherjee S, Nag S, Gaitanidis A, Kadas D, et al. A Muscle-Specific p38 MAPK/Mef2/MnSOD Pathway Regulates Stress, Motor Function, and Life Span in *Drosophila*. *Dev Cell*. 2011;21: 783–795. doi:10.1016/j.devcel.2011.09.002
  24. Worley MI, Alexander LA, Hariharan IK. CtBP impedes JNK- and Upd/STAT-driven cell fate misspecifications in regenerating *Drosophila* imaginal discs. *Elife*. 2018;7. doi:10.7554/eLife.30391
  25. Takatsu Y, Nakamura M, Stapleton M, Danos MC, Matsumoto K, O'Connor MB, et al. TAK1 participates in c-Jun N-terminal kinase signaling during *Drosophila* development. *Mol Cell Biol*. 2000;20: 3015–26. Available: <http://www.ncbi.nlm.nih.gov/pubmed/10757786>
  26. Adachi-Yamada T, Fujimura-Kamada K, Nishida Y, Matsumoto K. Distortion of proximodistal information causes JNK-dependent apoptosis in *Drosophila* wing. *Nature*. Division of Biological Science, Graduate School of Science, Nagoya University, Japan Science and Technology Corporation. [adachi@bio.nagoya-u.ac.jp](mailto:adachi@bio.nagoya-u.ac.jp); 1999;400: 166–169. doi:10.1038/22112
  27. Glise B, Bourbon H, Noselli S. hemipterous encodes a novel *Drosophila* MAP kinase kinase, required for epithelial cell sheet movement. *Cell*. 1995;83: 451–

461. doi:0092-8674(95)90123-X [pii]
28. Takeda K, Noguchi T, Naguro I, Ichijo H. Apoptosis Signal-Regulating Kinase 1 in Stress and Immune Response. *Annu Rev Pharmacol Toxicol.* 2008;48: 199–225. doi:10.1146/annurev.pharmtox.48.113006.094606
  29. Ichijo H, Nishida E, Irie K, ten Dijke P, Saitoh M, Moriguchi T, et al. Induction of apoptosis by ASK1, a mammalian MAPKKK that activates SAPK/JNK and p38 signaling pathways. *Science.* 1997;275: 90–4.
  30. Wang XS, Diener K, Jannuzzi D, Trollinger D, Tan TH, Lichenstein H, et al. Molecular cloning and characterization of a novel protein kinase with a catalytic domain homologous to mitogen-activated protein kinase kinase kinase. *J Biol Chem.* 1996;271: 31607–11.
  31. Saitoh M, Nishitoh H, Fujii M, Takeda K, Tobiume K, Sawada Y, et al. Mammalian thioredoxin is a direct inhibitor of apoptosis signal-regulating kinase (ASK) 1. *EMBO J.* 1998;17: 2596–2606. doi:10.1093/emboj/17.9.2596
  32. Liu H, Nishitoh H, Ichijo H, Kyriakis JM. Activation of apoptosis signal-regulating kinase 1 (ASK1) by tumor necrosis factor receptor-associated factor 2 requires prior dissociation of the ASK1 inhibitor thioredoxin. *Mol Cell Biol.* 2000;20: 2198–208.
  33. Sakauchi C, Wakatsuki H, Ichijo H, Hattori K. Pleiotropic properties of ASK1. *Biochim Biophys Acta - Gen Subj.* 2017;1861: 3030–3038. doi:10.1016/j.bbagen.2016.09.028
  34. Kim AH, Khursigara G, Sun X, Franke TF, Chao M V. Akt Phosphorylates and Negatively Regulates Apoptosis Signal-Regulating Kinase 1. *Mol Cell Biol.* 2001;21: 893–901. doi:10.1128/MCB.21.3.893-901.2001
  35. Yagi R, Mayer F, Basler K. Refined LexA transactivators and their use in combination with the Drosophila Gal4 system. *Proc Natl Acad Sci U S A. Institute of Molecular Life Sciences, University of Zurich, CH-8057 Zurich, Switzerland.;* 2010;107: 16166–16171. doi:1005957107 [pii] 10.1073/pnas.1005957107
  36. Cho Y-C, Park JE, Park BC, Kim J-H, Jeong DG, Park SG, et al. Cell cycle-dependent Cdc25C phosphatase determines cell survival by regulating apoptosis signal-regulating kinase 1. *Cell Death Differ. Nature Publishing Group;* 2015;22: 1605–1617. doi:10.1038/cdd.2015.2
  37. Stocker H, Andjelkovic M, Oldham S, Laffargue M, Wymann MP, Hemmings BA, et al. Living with lethal PIP3 levels: viability of flies lacking PTEN restored by a PH domain mutation in Akt/PKB. *Science.* 2002;295: 2088–91. doi:10.1126/science. 1068094
  38. Staveley BE, Ruel L, Jin J, Stambolic V, Mastronardi FG, Heitzler P, et al. Genetic analysis of protein kinase B (AKT) in Drosophila. *Curr Biol.* 1998;8: 599–602.
  39. Nishitoh H, Matsuzawa A, Tobiume K, Saegusa K, Takeda K, Inoue K, et al. ASK1 is essential for endoplasmic reticulum stress-induced neuronal cell death triggered by expanded polyglutamine repeats. *Genes Dev. Cold Spring Harbor Laboratory Press;* 2002;16: 1345–55. doi:10.1101/gad.992302
  40. Zhuang Z-H, Zhou Y, Yu M-C, Silverman N, Ge B-X. Regulation of Drosophila

- p38 activation by specific MAP2 kinase and MAP3 kinase in response to different stimuli. *Cell Signal*. 2006;18: 441–448.  
doi:10.1016/j.cellsig.2005.05.013
41. Kuranaga E, Kanuka H, Igaki T, Sawamoto K, Ichijo H, Okano H, et al. Reaper-mediated inhibition of DIAP1-induced DTRAF1 degradation results in activation of JNK in *Drosophila*. *Nat Cell Biol*. 2002;4: 705–710. doi:10.1038/ncb842
  42. Uhlirova M, Bohmann D. JNK- and Fos-regulated Mmp1 expression cooperates with Ras to induce invasive tumors in *Drosophila*. *EMBO J*. Department of Biomedical Genetics, University of Rochester Medical Center, Rochester, NY 14642, USA.; 2006;25: 5294–5304. doi:7601401 [pii] 10.1038/sj.emboj.7601401
  43. Haynie J, Bryant PJ. The effects of X-rays on the proliferation dynamics of cells in the imaginal wing disc of *Drosophila melanogaster*. *Roux's Arch Dev Biol*. 1977;183: 85–100. doi:10.1007/BF00848779
  44. Bergmann A, Steller H. Apoptosis, stem cells, and tissue regeneration. *Sci Signal*. 2010;3: re8. doi:10.1126/scisignal.3145re8
  45. Loo AEK, Wong YT, Ho R, Wasser M, Du T, Ng WT, et al. Effects of Hydrogen Peroxide on Wound Healing in Mice in Relation to Oxidative Damage. Sastre J, editor. *PLoS One*. 2012;7: e49215. doi:10.1371/journal.pone.0049215
  46. Yoo SK, Starnes TW, Deng Q, Huttenlocher A. Lyn is a redox sensor that mediates leukocyte wound attraction in vivo. *Nature*. NIH Public Access; 2011;480: 109–12. doi:10.1038/nature10632
  47. Yoo SK, Freisinger CM, LeBert DC, Huttenlocher A. Early redox, Src family kinase, and calcium signaling integrate wound responses and tissue regeneration in zebrafish. *J Cell Biol*. The Rockefeller University Press; 2012;199: 225–34. doi:10.1083/jcb.201203154
  48. Gauron C, Rampon C, Bouzaffour M, Ipendey E, Teillon J, Volovitch M, et al. Sustained production of ROS triggers compensatory proliferation and is required for regeneration to proceed. *Sci Rep*. 2013;3: 2084. doi:10.1038/srep02084
  49. Han P, Zhou X-H, Chang N, Xiao C-L, Yan S, Ren H, et al. Hydrogen peroxide primes heart regeneration with a derepression mechanism. *Cell Res*. Nature Publishing Group; 2014;24: 1091–107. doi:10.1038/cr.2014.108
  50. Niethammer P, Grabher C, Look AT, Mitchison TJ. A tissue-scale gradient of hydrogen peroxide mediates rapid wound detection in zebrafish. *Nature*. 2009;459: 996–9. doi:10.1038/nature08119
  51. Love NR, Chen Y, Ishibashi S, Kritsiligkou P, Lea R, Koh Y, et al. Amputation-induced reactive oxygen species are required for successful *Xenopus* tadpole tail regeneration. *Nat Cell Biol*. 2013;15: 222–8. doi:10.1038/ncb2659
  52. Ferreira F, Luxardi G, Reid B, Zhao M. Early bioelectric activities mediate redox-modulated regeneration. *Development*. 2016;143: 4582–4594. doi:10.1242/dev.142034
  53. Zhang Q, Wang Y, Man L, Zhu Z, Bai X, Wei S, et al. Reactive oxygen species generated from skeletal muscles are required for gecko tail regeneration. *Sci Rep*. Nature Publishing Group; 2016;6: 20752. doi:10.1038/srep20752
  54. Pirotte N, Stevens A-S, Fraguas S, Plusquin M, Van Roten A, Van Belleghem F,

- et al. Reactive Oxygen Species in Planarian Regeneration: An Upstream Necessity for Correct Patterning and Brain Formation. *Oxid Med Cell Longev*. Hindawi Publishing Corporation; 2015;2015: 392476. doi:10.1155/2015/392476
55. Wenger Y, Buzgariu W, Reiter S, Galliot B. Injury-induced immune responses in Hydra. *Semin Immunol*. 2014;26: 277–294. doi:10.1016/j.smim.2014.06.004
  56. Moreira S, Stramer B, Evans I, Wood W, Martin P. Prioritization of competing damage and developmental signals by migrating macrophages in the *Drosophila* embryo. *Curr Biol*. 2010;20: 464–70. doi:10.1016/j.cub.2010.01.047
  57. Zhuang Z-H, Zhou Y, Yu M-C, Silverman N, Ge B-X. Regulation of *Drosophila* p38 activation by specific MAP2 kinase and MAP3 kinase in response to different stimuli. *Cell Signal*. 2006;18: 441–448. doi:10.1016/j.cellsig.2005.05.013
  58. Shlevkov E, Morata G. A dp53/JNK-dependant feedback amplification loop is essential for the apoptotic response to stress in *Drosophila*. *Cell Death Differ*. 2012;19: 451–60. doi:10.1038/cdd.2011.113
  59. Metaxakis A, Oehler S, Klinakis A, Savakis C. Minos as a genetic and genomic tool in *Drosophila melanogaster*. *Genetics*. Genetics Society of America; 2005;171: 571–81. doi:10.1534/genetics.105.041848
  60. Venken KJT, Schulze KL, Haelterman NA, Pan H, He Y, Evans-Holm M, et al. MiMIC: a highly versatile transposon insertion resource for engineering *Drosophila melanogaster* genes. *Nat Methods*. Nature Research; 2011;8: 737–743. doi:10.1038/nmeth.1662
  61. Barrio R, de Celis JF. Regulation of spalt expression in the *Drosophila* wing blade in response to the Decapentaplegic signaling pathway. *Proc Natl Acad Sci U S A*. 2004;101: 6021–6026. doi:10.1073/pnas.0401590101 0401590101 [pii]

## Figure Legends

**Figure 1. Ask1 is necessary for imaginal disc regeneration.** (A) Percentage of fully regenerated wings (normal wings) in *Ask1* mutant backgrounds after genetic ablation. Left: Scheme of the zone ablated (purple) in wing disc and its corresponding region in the adult wing. Right: Examples of wings with full regeneration and incomplete regeneration. (B) Percentage of normal wings in controls (*rpr* or *Ask1<sup>RNAi</sup>* expression alone) and experimental samples (*rpr* and *Ask1<sup>RNAi</sup>* dual expression). Left: Double transgene activation scheme. Zone ablated using *sal<sup>E/Pv</sup>LHG lexO-rpr* (purple) in wing disc and its corresponding region in the adult wing; the zone of the *Ask1<sup>RNAi</sup>* transgene expression is indicated in red or green. Right: Examples of resulting wings. *Sal<sup>E/Pv</sup>>rpr* ON: indicates activated genetic ablation (11hours at 29°C); *sal<sup>E/Pv</sup>>rpr* OFF: examples of control wings without *rpr*-activation (kept at 17°C) for the genotypes indicated. (C) Phosphorylated H3 as indicator of mitotic cells per area in discs with the dual transactivation system using *rpr* and *Ask1<sup>RNAi</sup>* for the genotypes indicated (n=30 each genotype). Error bars in (A,B) show standard error of sample proportion and in (C) standard deviation. \*\*\*P<0.001.

**Figure 2. Ask1 is activated upon induction of apoptosis.** (A) Structural features of Ask1-RC isoform. It possesses a phosphokinase domain (KD) with a highly conserved core of threonines (in green). In the N-terminal domain, Ask1-RC shows the DUF4071 domain (in red). In the C-terminal domain, there is a coiled coil domain (dark grey), which allows interactions between Ask1 monomers to form oligomers [28]. Phosphorylation sites are shown. Activation of Ask1 is ROS-dependent. Inactive Ask1 is constituted by association of Ask1 monomers through the coiled coil domain and the reduced form of thioredoxin (Trx-SH) in the N-terminal domain. Upon oxidation, Trx-S-S dissociates, which allows Ask1 to autophosphorylate in the phosphokinase domain, leading to an active Ask1. Active Akt attenuates Ask1 activity by phosphorylating the Ser83 residue *in vitro* [28,34]. (B-C) Characterization of mammalian P-ASK1 antibodies in *Drosophila* discs. Endogenous levels of P-Thr (B) and P-Ser83 (C) in wild-type (WT) discs. P-Thr is found in all cells, but increases in mitotic cells. P-Ser83 is also found in all cells of the disc epithelium. (D) Ask1 activity in *sal<sup>E/Pv</sup>>rpr* genetic ablation. *Sal<sup>E/Pv</sup>>rpr* disc indicating the area imaged (white square); TP-3 (TO-PRO-3) nuclei; purple area: the *sal<sup>E/Pv</sup>>rpr* ablated zone. Disc stained with Ask1 P-Thr, detected in apoptotic cells (TUNEL assay, n=21). Disc stained with Ask1 P-Ser83, only found in living cells near the apoptotic zone (n=35). (E-F) After cell death (*sal<sup>E/Pv</sup>>rpr*) and

simultaneous inhibition of *Ask1* in the anterior compartment ( $ci>Ask1^{RNAi}$ ; black zone in the inset cartoon), P-Thr (E) and P-Ser83 (F) were specifically inhibited in this area. White dotted line indicates the AP boundary; anterior to the left, posterior to the right. The inset in (E) depicts the  $Ask1^{RNAi}$  area (black) and the  $sal^{E/PV}>rpr$  ablated zone (purple). (G) Ectopic expression of the  $Ask1^{WT}$  form in the posterior compartment (blue) leads to an increase in P-Ser83 and a weak increment of P-Thr. (H) Ectopic expression of the truncated form  $Ask1^{S83A}$  does not raise levels of P-Ser83, but does increase P-Thr. Scale bars 50 $\mu$ m. (I) Percentage of regenerated wings (normal wings) in controls ( $rpr$ ,  $Ask1^{WT}$  or  $Ask1^{S83A}$  expression alone) and experimental samples ( $rpr$  and  $Ask1^{WT}$  or  $Ask1^{S83A}$  dual expression). Right: Examples of a wing with normal and anomalous regeneration ( $sal^{E/PV}>rpr$ ,  $ci> Ask1^{S83A}$ ). Error bars show standard error of sample proportion. \*\*P<0.01 \*\*\*P<0.001.

**Figure 3. Phosphorylation of *Drosophila* Ask1 Ser83 depends on the Pi3K/Akt1 pathway.** (A-C) P-Akt staining in wild-type discs (A), and after  $ptc>rpr$  (B), and  $sal>rpr$  induction (C). Akt1 is activated in living cells surrounding the apoptotic cells. Apoptotic zone of pyknotic nuclei, in purple. (D,E) RNA interference of *Akt1* in the *ptc* stripe of cells ( $ptc>Akt1^{RNAi}$ ) leads to a decrease of P-Akt and Ask1 P-Ser83 basal levels. (F,G) Ectopic expression of a constitutively active form of *Akt1* ( $ptc>myr-Akt1.S$ ) promotes P-Akt and Ask1 P-Ser83. (H) Design of the experiments in I,J and K with  $sal^{E/PV}>rpr$  induction (purple) and blocking Pi3K ( $hh>dp110^{DN}$ ) in the posterior compartment (black). Staining with anti-P-Akt (I), with anti-Ask1 P-Ser83 (J) with Ask1 P-Thr (K). Note that both P-Akt and P-Ser83 decrease in the posterior compartment but not P-Thr. Dotted white line indicates anterior-posterior boundary. TP-3; TO-PRO-3 nuclear staining. Scale bars 50 $\mu$ m. (L) Left: Percentage of fully regenerated wings after genetic ablation and Pi3K pathway inhibition alone or in combination with *Ask1* mutant backgrounds (genotypes indicated). Right:  $sal^{E/PV}>$  ON, examples of wings with full regeneration (controls  $sal^{E/PV}>rpr$ ,  $ci>dp110^{DN}$ ) and anomalous regeneration (genotypes indicated);  $sal^{E/PV}>$  OFF wings: examples of control wings in the absence of *rpr*-ablation (maintained at 17°C). Error bars indicate standard error of sample proportion. \*\*\*P<0.001.

**Figure 4. Ask1 is activated by ROS.** (A) Design of experiments after feeding larvae with the NAC antioxidant. (B) Examples of Ask1 P-Thr after  $sal^{E/PV}>rpr$  induction in standard or NAC-supplemented food. Mean pixel intensities of P-Thr fluorescent labeling in the apoptotic zone of  $sal^{E/PV}>rpr$  discs from larvae fed with a standard (dying

cells  $94.01 \pm 17.04$ ; S.D.,  $n=11$ ) or NAC-supplemented (dying cells  $31.07 \pm 9.38$ ; S.D.  $n=10$ ) diet. (C) Examples of Ask1 P-Ser83 after  $sal^{E/PV} > rpr$  induction with standard or NAC-supplemented food. White dotted line indicates the  $sal^{E/PV} > rpr$  dying domain. Mean pixel intensities of Ask1 P-Ser83 fluorescent labeling in the neighboring cells near the apoptotic zone of  $sal^{E/PV} > rpr$  discs from larvae fed with a standard (living cells  $57.56 \pm 23.27$ ; S.D.,  $n=20$ ) or NAC-supplemented (living cells  $29.54 \pm 5.92$ ; S.D.,  $n=18$ ) diet. (D) Design of experiments after enhancing oxidative stress. (E) Left: P-Thr mean pixel intensity of wild-type wing discs from larvae fed with standard ( $79.36 \pm 18.65$ ; S.D.,  $n=17$ ),  $H_2O_2$ - ( $93.37 \pm 3.87$ ; S.D.,  $n=7$ ) and tunicamycin-supplemented ( $125.49 \pm 12.51$ ; S.D.,  $n=7$ ) food. Right: P-Thr mean pixel intensity of  $Ask1^{MB06487}$  homozygous mutant discs from larvae fed with standard ( $92.92 \pm 9.75$ ; S.D.,  $n=6$ ),  $H_2O_2$ - ( $83.66 \pm 7.11$ ; S.D.  $n=11$ ) and tunicamycin-supplemented ( $87.99 \pm 21.38$ ; S.D.,  $n=7$ ) food. (F) Left: P-Ser83 mean pixel intensity of wild-type wing discs from larvae fed with standard ( $79.14 \pm 17.69$ ; S.D.,  $n=19$ ),  $H_2O_2$ - ( $110.89 \pm 15.43$ ; S.D.,  $n=14$ ) and tunicamycin-supplemented ( $128.35 \pm 14.42$ ; S.D.,  $n=5$ ) food. Right: P-Ser83 mean pixel intensity of  $Ask1^{MB06487}$  homozygous mutant discs from larvae fed with standard ( $81.83 \pm 20.25$ ; S.D.,  $n=12$ ),  $H_2O_2$ - ( $87.51 \pm 6.40$ ; S.D.,  $n=6$ ) and tunicamycin-supplemented ( $90.27 \pm 13.26$ ; S.D.;  $n=4$ ) food. (G) P-Akt (top) and P-Ser (bottom) mean pixel intensity from discs with  $rpr$  activation ( $sal^{E/PV} > rpr$ , *GFP*; high stress) and from discs with simultaneous *Sod1:Cat* and  $rpr$  activation ( $sal^{E/PV} > rpr$ , *Sod1:Cat*; low stress). Purple area shows where transgenes were activated. A and P are the zones where intensity was measured. P-Akt mean pixel intensity for  $sal^{E/PV} > rpr$ , *GFP* was  $100.61 \pm 25.14$ , S.D. in A and  $92.64 \pm 21.38$ , S.D. in P; and for  $sal^{E/PV} > rpr$ , *Sod1:Cat* was  $68.04 \pm 18.16$ , S.D. in A and  $63.14 \pm 15.66$ , S.D. in P. P-Ser83 mean pixel intensity for  $sal^{E/PV} > rpr$ , *GFP* was  $86.89 \pm 34.49$ , S.D. in A and  $78.46 \pm 31.06$ , S.D. in P; and for  $sal^{E/PV} > rpr$ , *Sod1:Cat* was  $63.25 \pm 23.82$ , S.D. in A and  $54.32 \pm 19.92$ , S.D. in P.  $N=23$  discs for each genotype. \* $P < 0.05$ . \*\* $P < 0.01$ , \*\*\* $P < 0.001$ . Error bars indicate standard deviation. TP-3: TO-PRO-3 nuclear staining. Scale bars:  $50 \mu m$ .

**Figure 5. Ask1 promotes JNK and p38 signaling.** (A) P-p38 after  $sal^{E/PV} > rpr$  induction. P38 is phosphorylated in living cells around the dying domain ( $n=14$ ). (B) Inhibition of *Ask1* in the anterior compartment ( $sal^{E/PV} > rpr$  *ci>Ask1<sup>RNAi</sup>*) blocks induced P-p38 ( $n=7$ ). (C) *Mmp1* after  $sal^{E/PV} > rpr$  induction. *Mmp1* expression is induced in dying and living cells ( $n=16$ ). (D) Inhibition of *Ask1* in the anterior compartment ( $sal^{E/PV} > rpr$  *ci>Ask1<sup>RNAi</sup>*) blocks *Mmp1* expression ( $n=14$ ). TP-3: TO-PRO-3 nuclear staining. Purple:  $sal^{E/PV} > rpr$  ablated zone. White dotted line divides the discs into anterior (*Ask1* inhibition; to the left) and posterior (wild-type; to the right) compartments. (E-H) RNA

interference of *Ask1* inhibits P-p38 and Mmp1 expression after physical injury. The *UAS-Ask1<sup>RNAi</sup>* was activated in the posterior compartment together with *UAS-GFP* (green). Two injuries were inflicted with tungsten needles in Schneider's medium, one in the anterior and one in the posterior compartment. (E) For P-p38 staining, discs were immediately fixed after physical injury. (F) For Mmp1 staining, discs were first cut and cultured for 5 hours before fixation and processing. White lines indicate the wound site. Scale bar: 50 $\mu$ m. (G) Quantification of P-p38 activation at the wound site (n=10 discs each genotype). (H) Quantification of Mmp1 at the wound site (n=8 discs each genotype). Error bars indicate standard deviation. \*\*\*P<0.001. (I) Model proposed for the onset of regeneration. Low levels of ROS trigger regeneration through Ask1 activation, which is attenuated by the Pi3K/Akt pathway, leading to moderate activation of JNK and p38. In dead cells, high ROS levels promote high Ask1 and high JNK activity, in the absence of Akt1-driven attenuation.

## Supporting Information Legends

**S1 Figure.** (A) Mitotic (P-H3 positive) cells co-localize with high levels of Ask1 P-Thr. Lower right images: Zoom of mitotic cells from the white square. TP-3: TO-PRO-3 nuclear staining. (B) The basal levels of P-Thr in wild-type (WT) discs (mitotic and interphase cells) decrease in the *Ask1<sup>MB06487</sup>* homozygous mutant background and are strongly reduced in the *Ask1<sup>MB06487</sup>* mutant background over the deficiency *Def(3R)50636*. Quantification of mean pixel intensity for P-Thr in mitotic and for P-Thr in non-mitotic (basal levels) cells are shown in separate graphics. P-Thr mean Pixel intensity in mitotic cells of the wild-type discs (+/+), 113.92 $\pm$ 20.60, S.D. (n=10); of the *Ask1<sup>MB06487</sup>/Ask1<sup>MB06487</sup>* discs, 104.43 $\pm$ 9.54, S.D. (n=10); and of the *Ask1<sup>MB06487</sup>/Def(3R)BSC636* 88.37 $\pm$ 13.03, S.D. (n=10). Mean pixel intensity of the basal levels in interphase cells of the wild-type, 50.44 $\pm$ 6.27, S.D. (n=20); of the *Ask1<sup>MB06487</sup>/Ask1<sup>MB06487</sup>*, 41.65 $\pm$ 4.80, S.D. (n=10); and of the *Ask1<sup>MB06487</sup>/Def(3R)BSC636*, 27.22 $\pm$ 5.73, S.D. (n=18). (C) Inhibition of the endogenous Ask1 P-Ser83 levels after expressing the *UAS-Ask1<sup>RNAi</sup>* in the posterior compartment, using the *hh-Gal4* driver. Scale bars: 50 $\mu$ m.

**S2 Figure.** (A) Left: wild-type disc stained with P-Ser83. Right: disc in which apoptosis has been induced with the driver *ptc-Gal4 UAS-rpr (ptc>rpr)* and stained with P-Ser83 (n=5) showing extensive increase in P-Ser83 in the undamaged cells. (B) *Sal<sup>E/PV</sup>>hid*



discs stained with P-Thr (n=12) and P-Ser83 (n=5). TP-3: TO-PRO-3 nuclear staining. Purple: *sal<sup>E/PV</sup>>rpr* ablated zone. (C) After physical injury, Ask1 P-Ser83 (n=6) accumulates in cells at the wound edges. Square: magnified image. Scale bars: 50µm.

**S3 Figure.** (A) Design of the experiments in B,C and D with *sal<sup>E/PV</sup>>rpr* cell death (purple) and blocking Pi3K (*ci>dp110<sup>DN</sup>*) in the anterior compartment (black). (B-D) Staining of P-Akt (B), Ask1 P-Ser83 (C) and Ask1 P-Thr (D). Note that P-Akt and P-Ser83 localization is reduced but not P-Thr. Dotted white line indicates anterior-posterior boundary. TP3: TO-PRO-3 nuclear staining. Scale bars: 50µm.

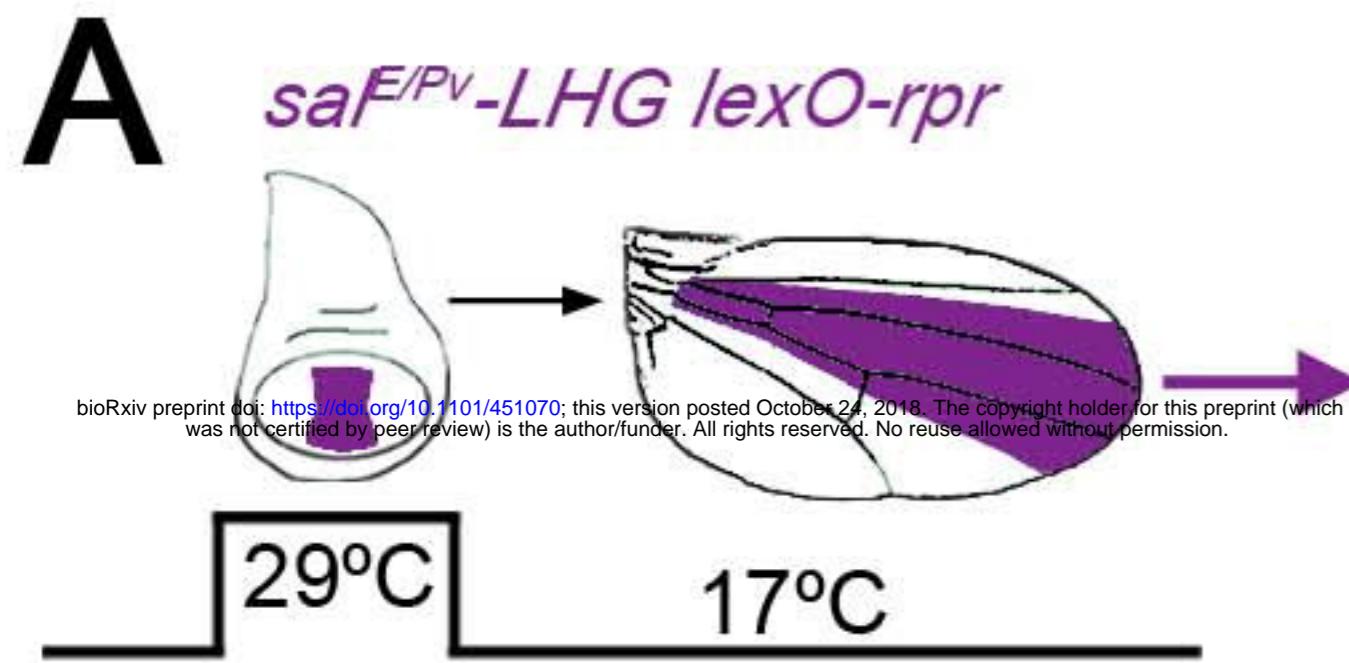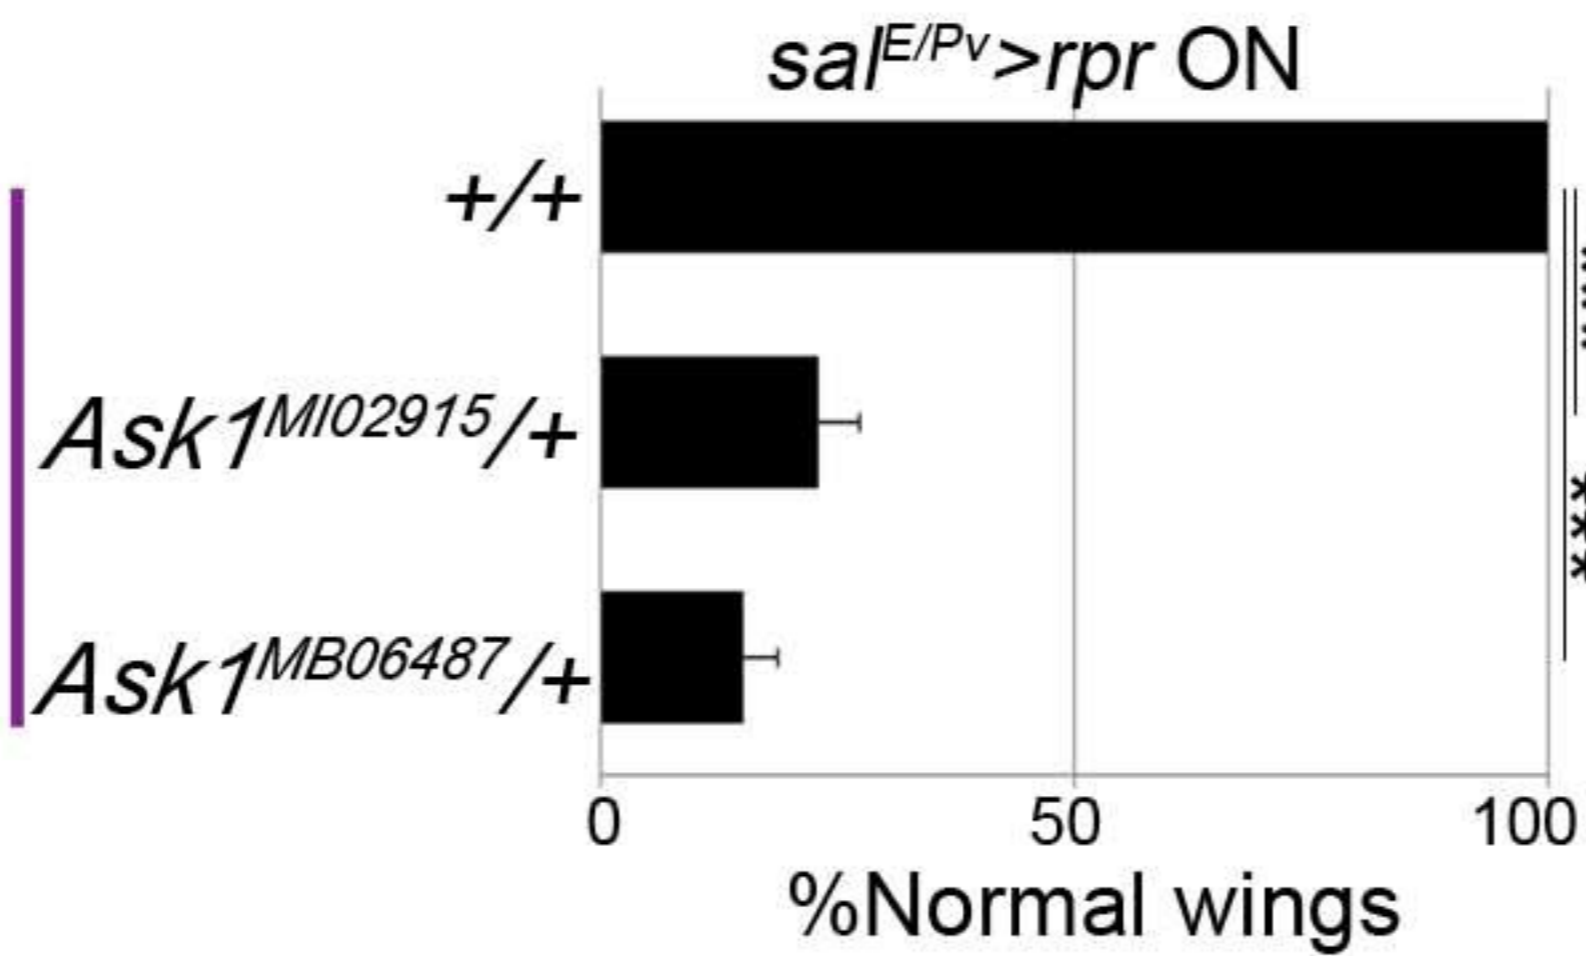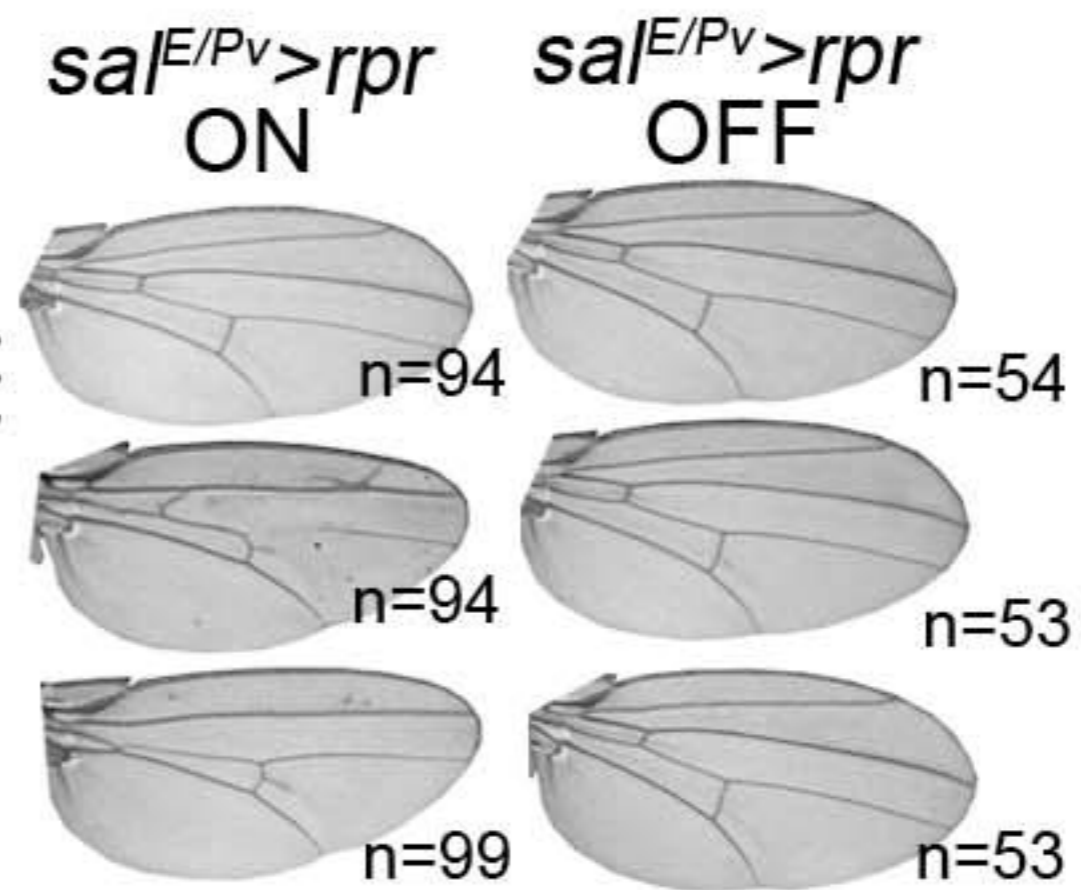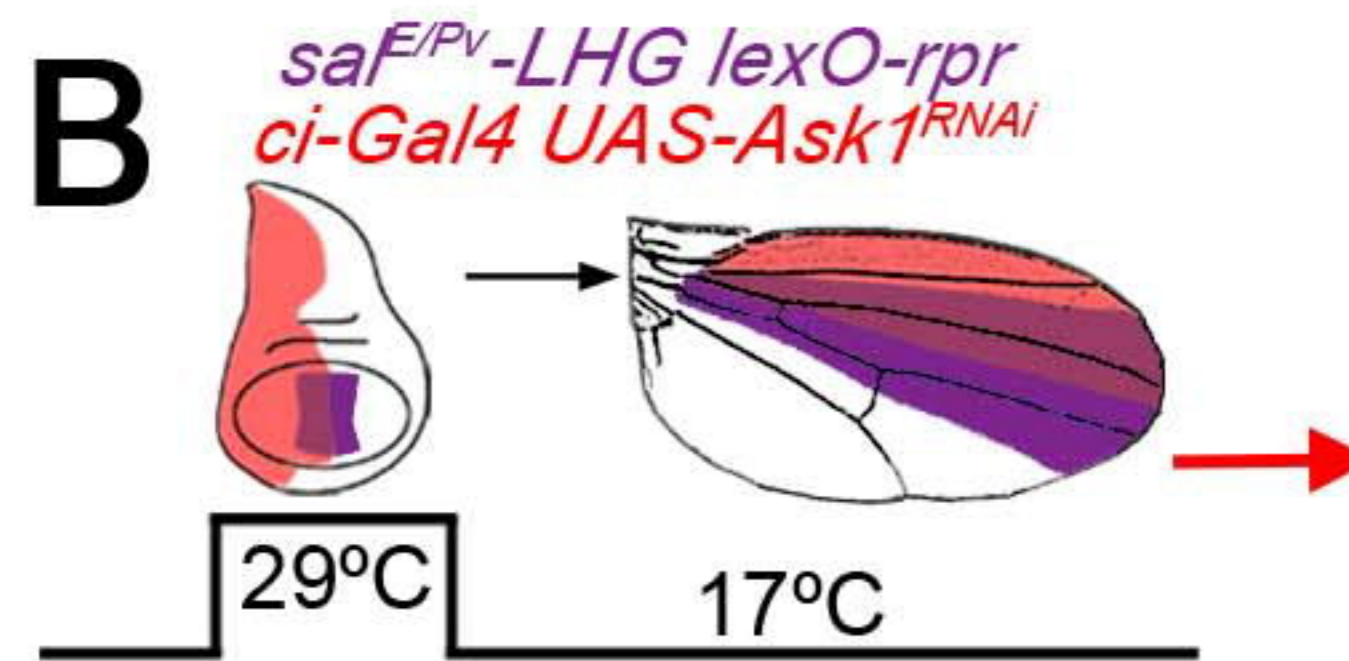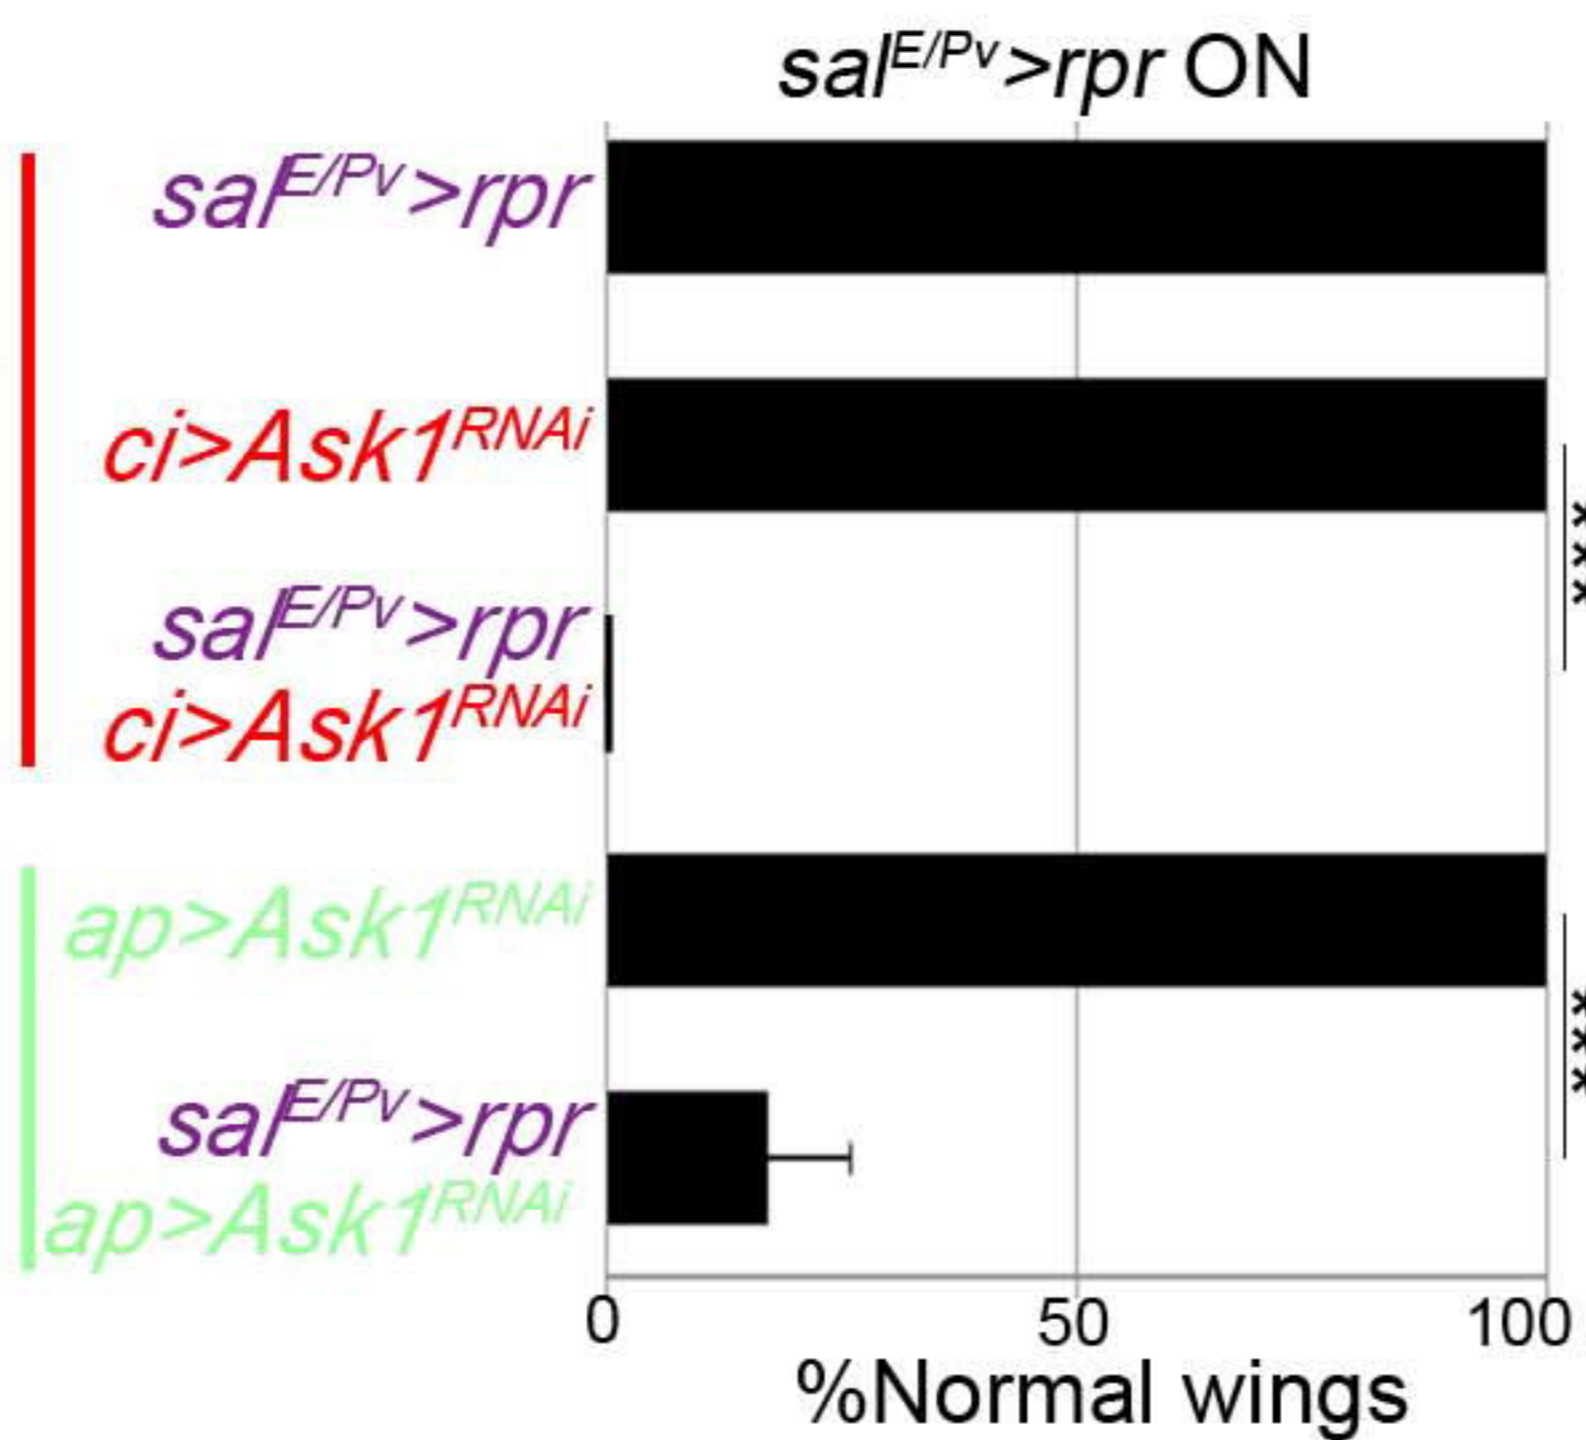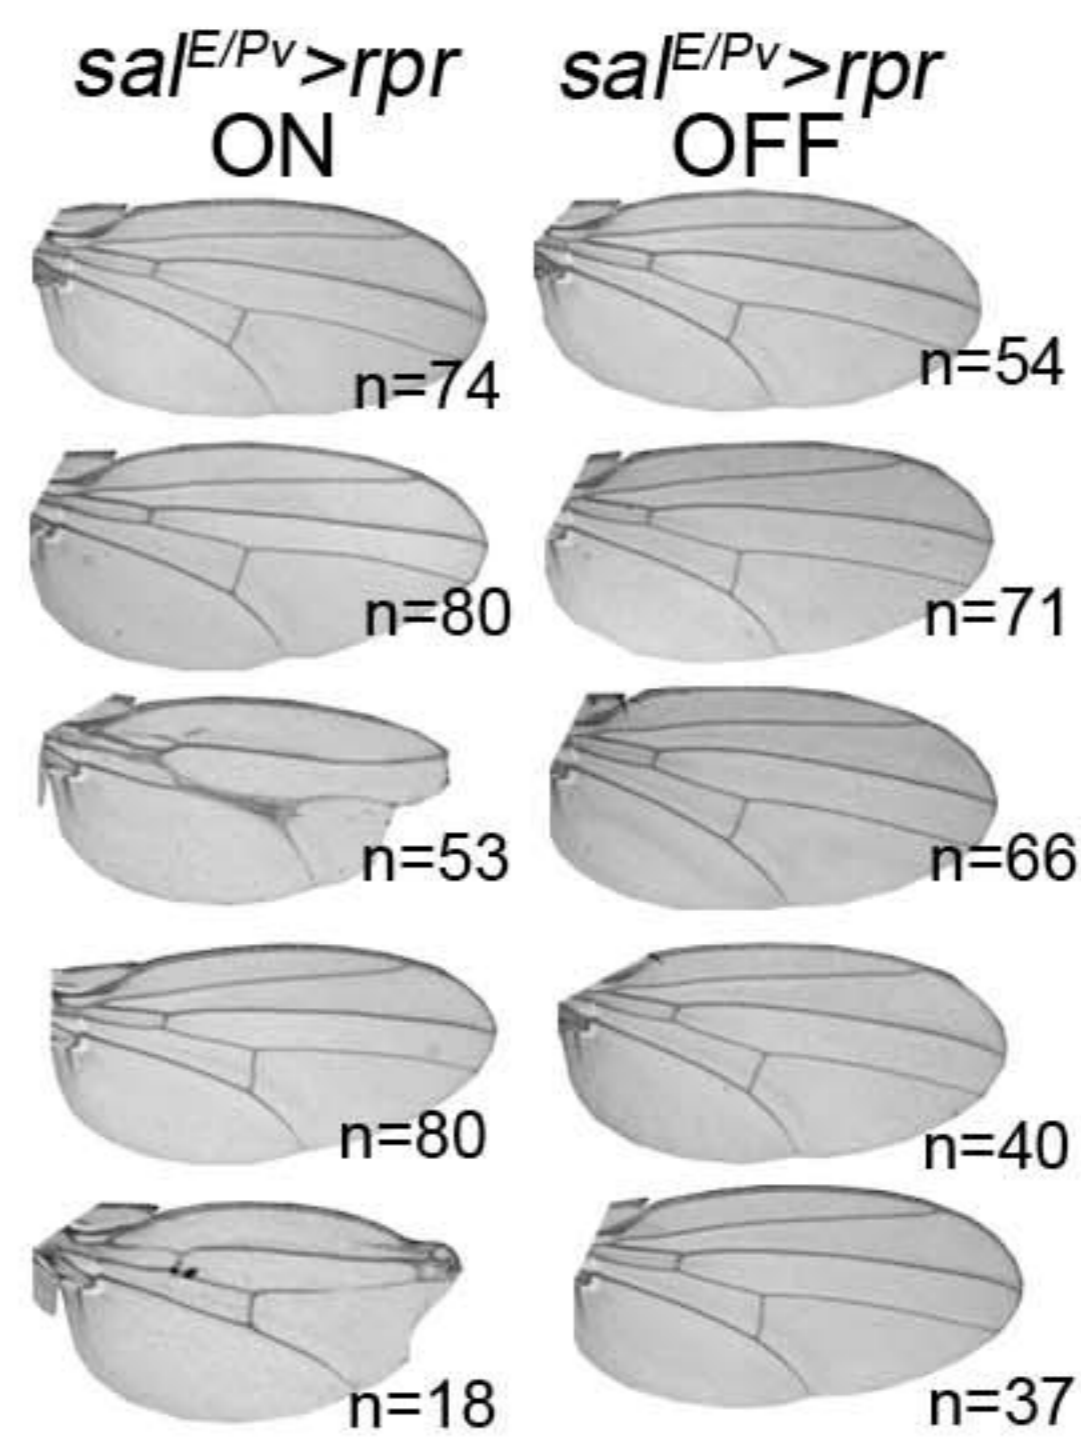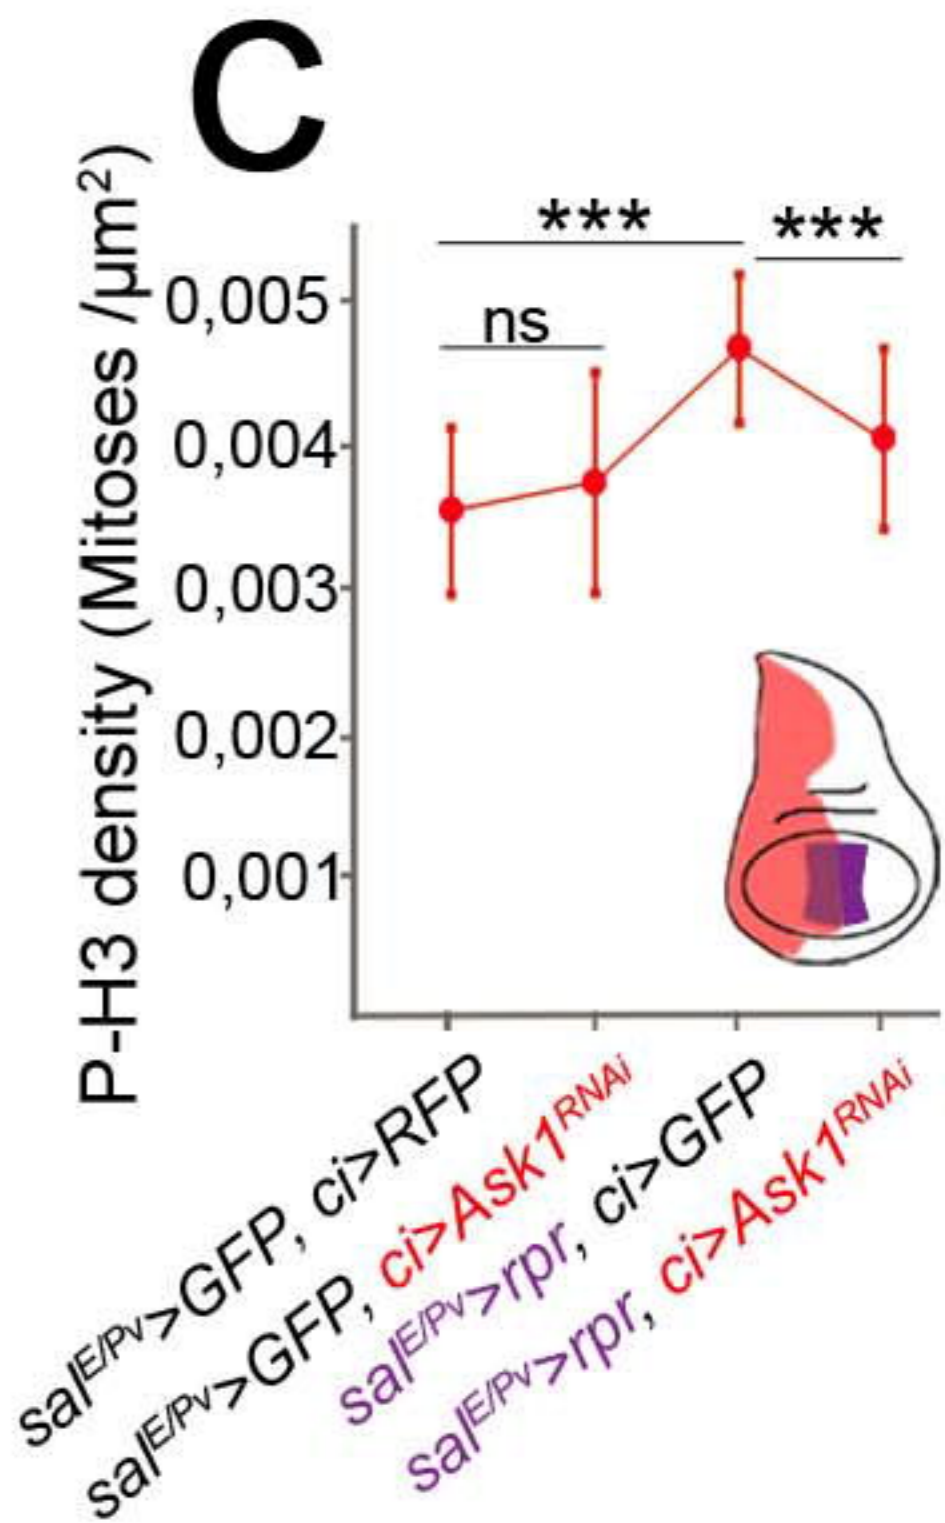

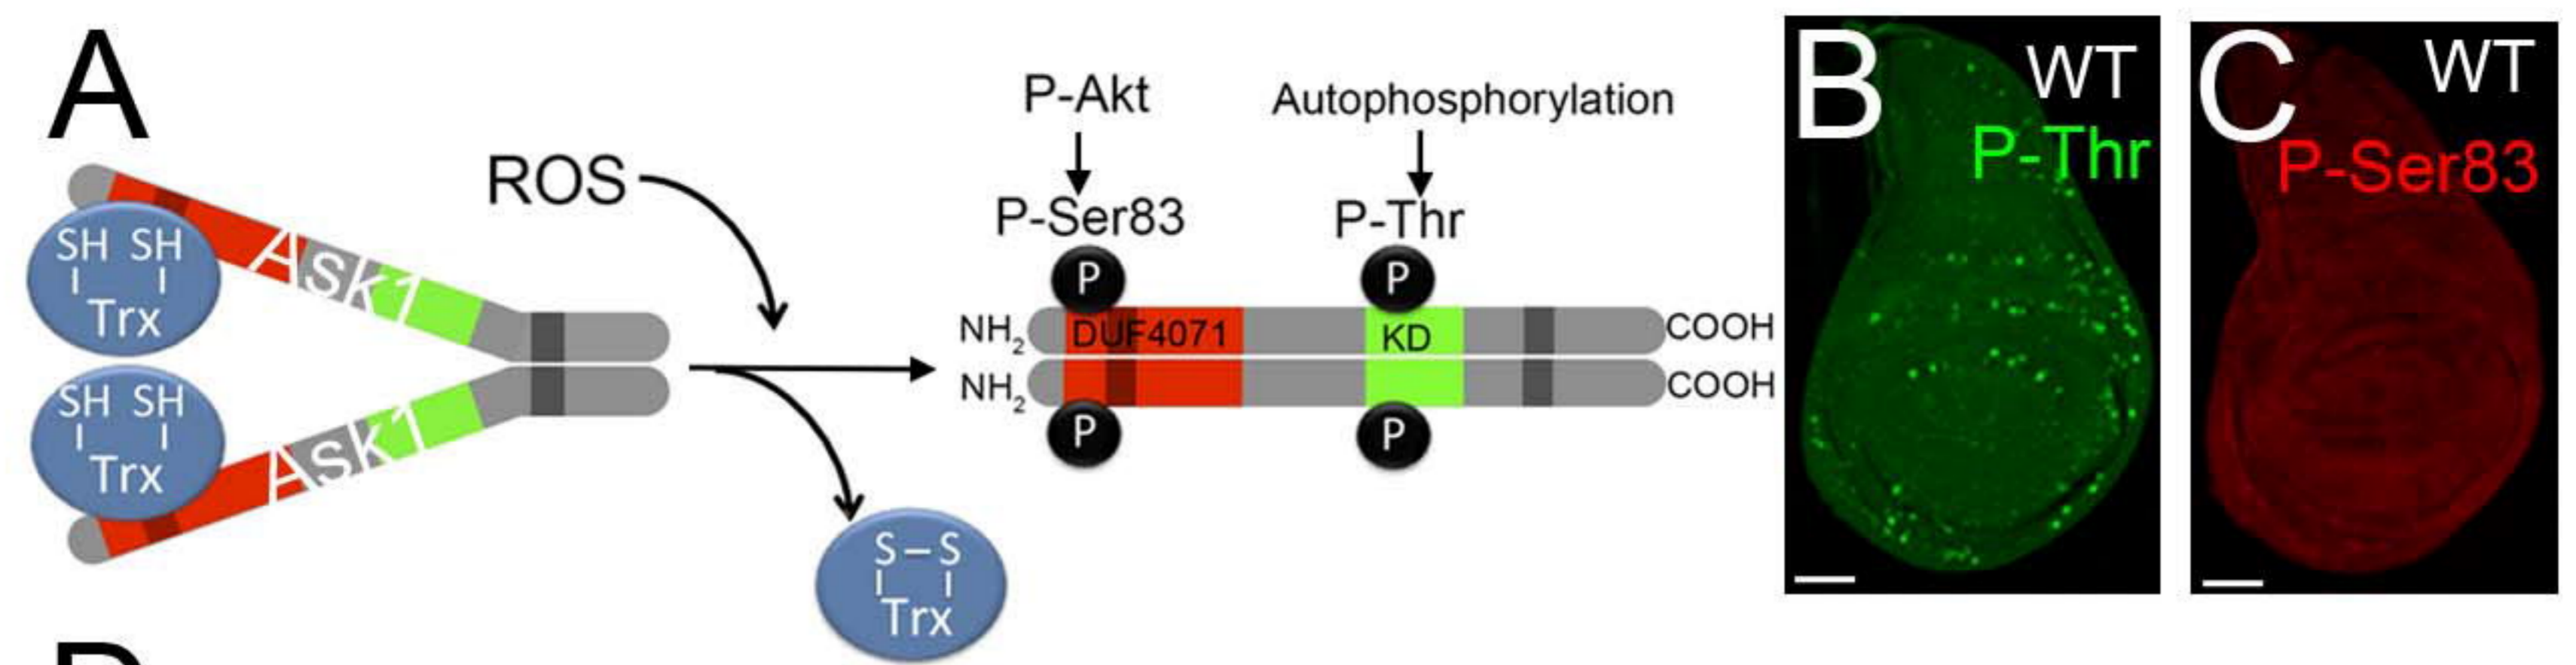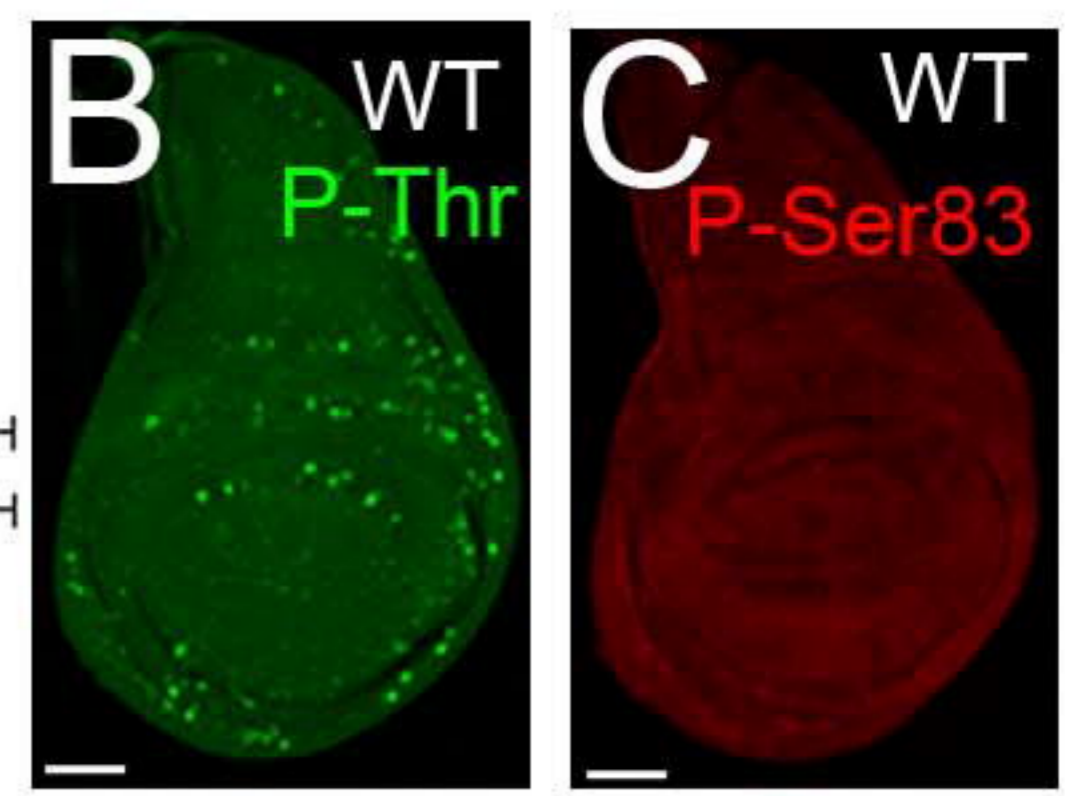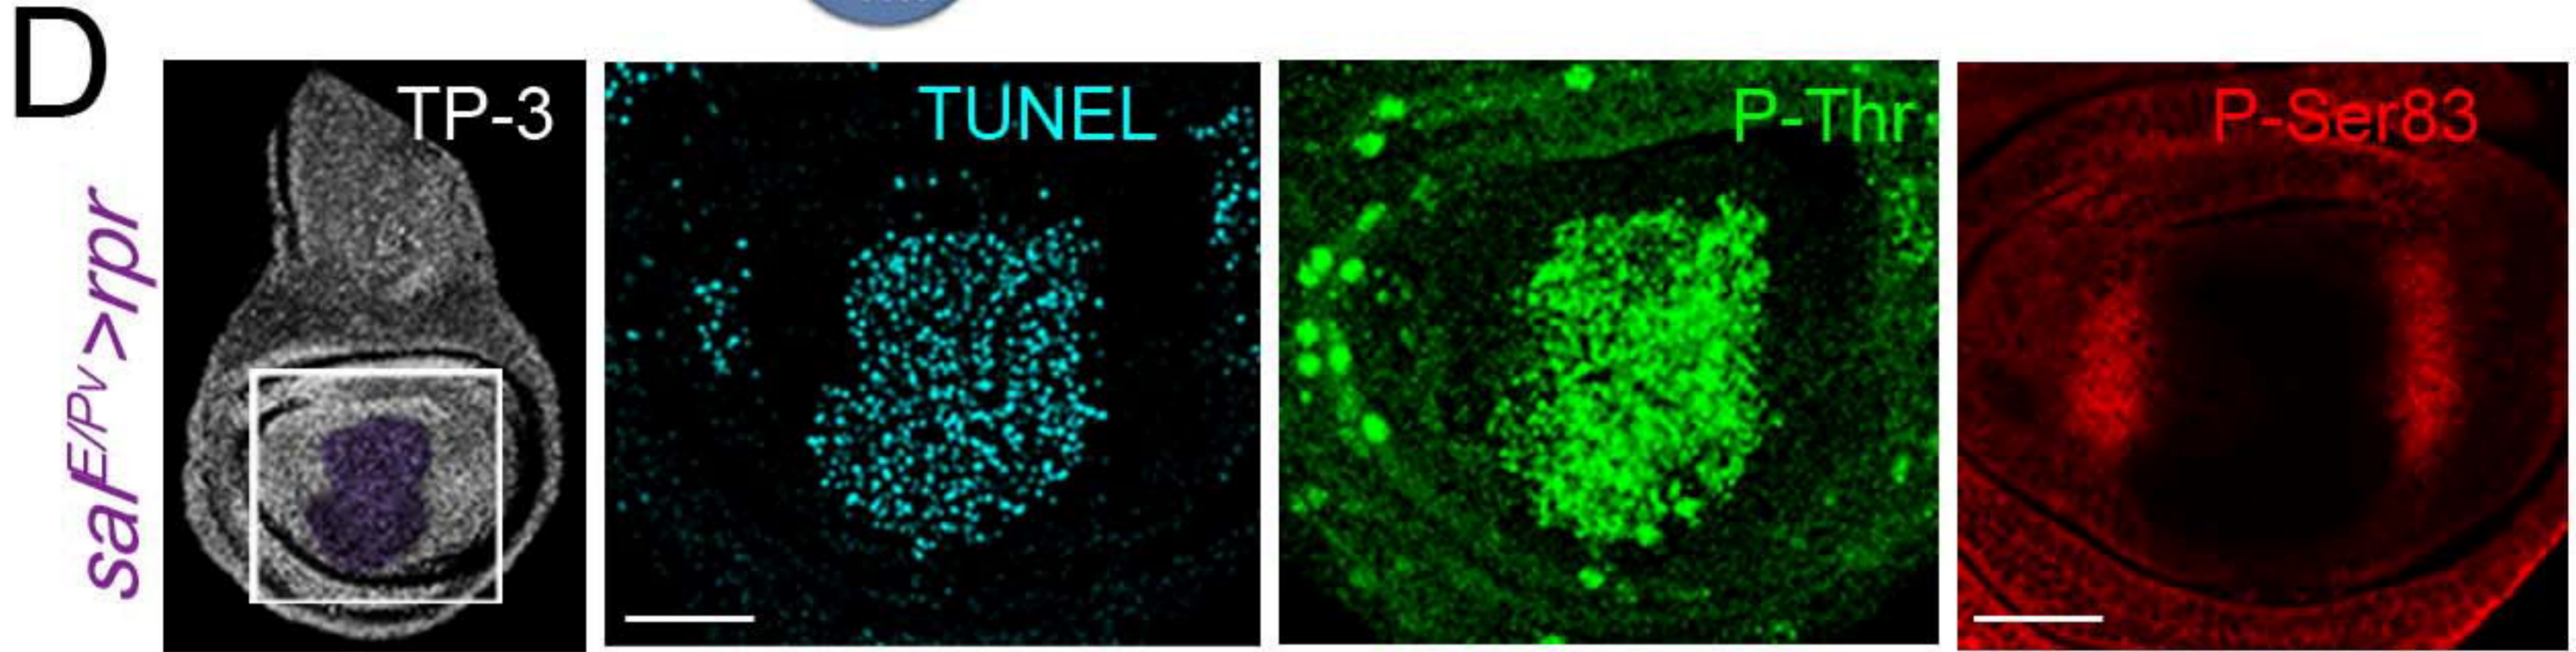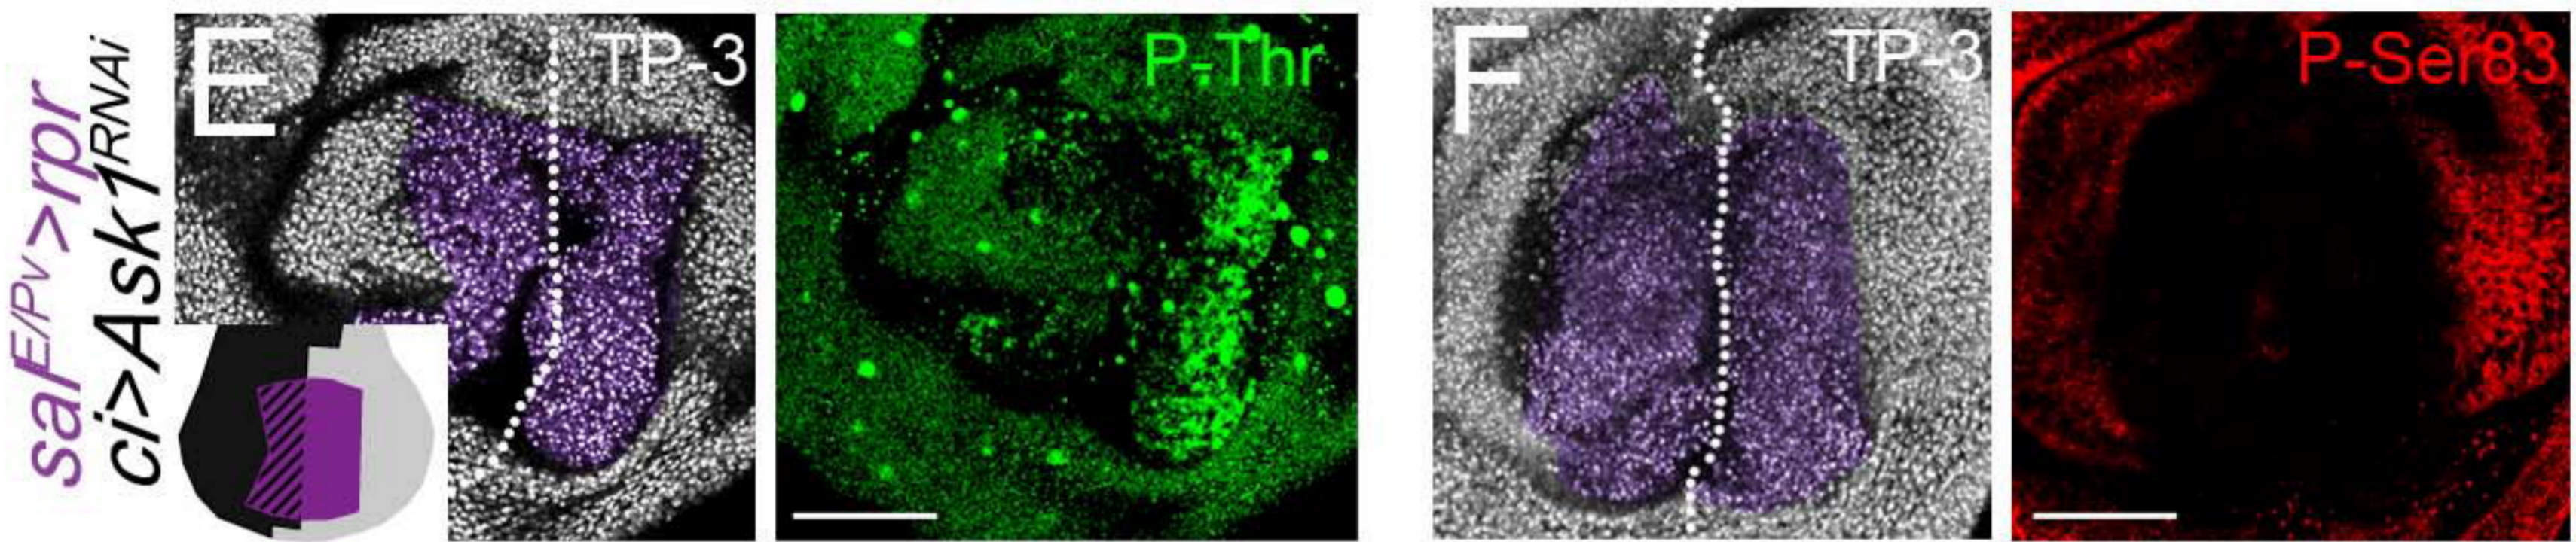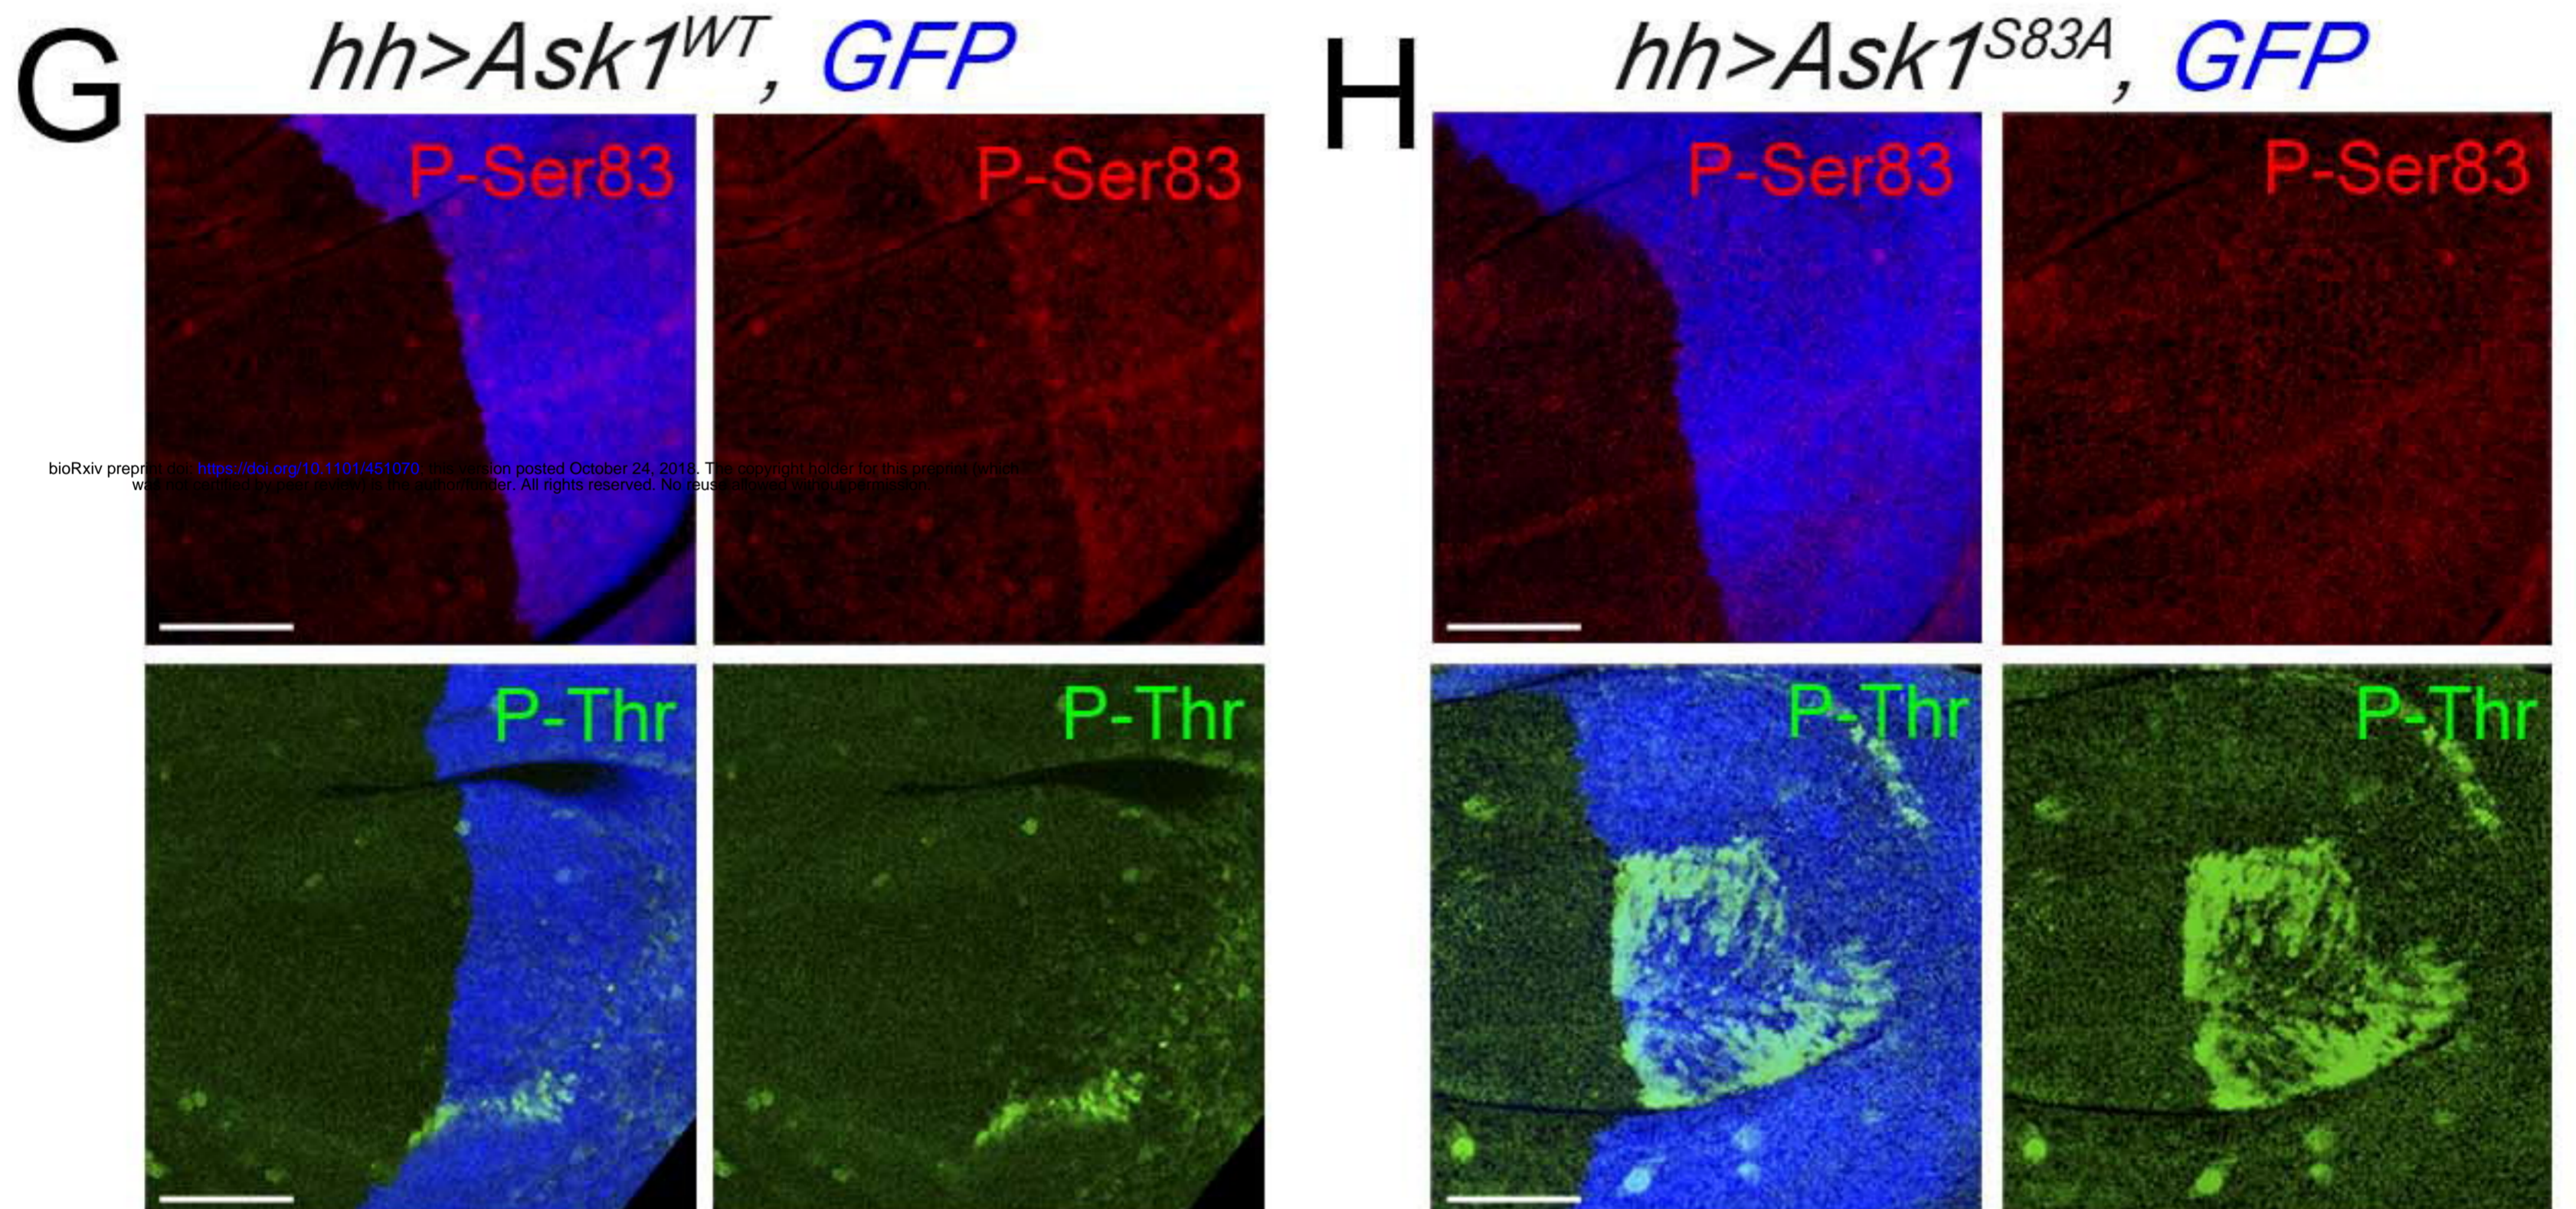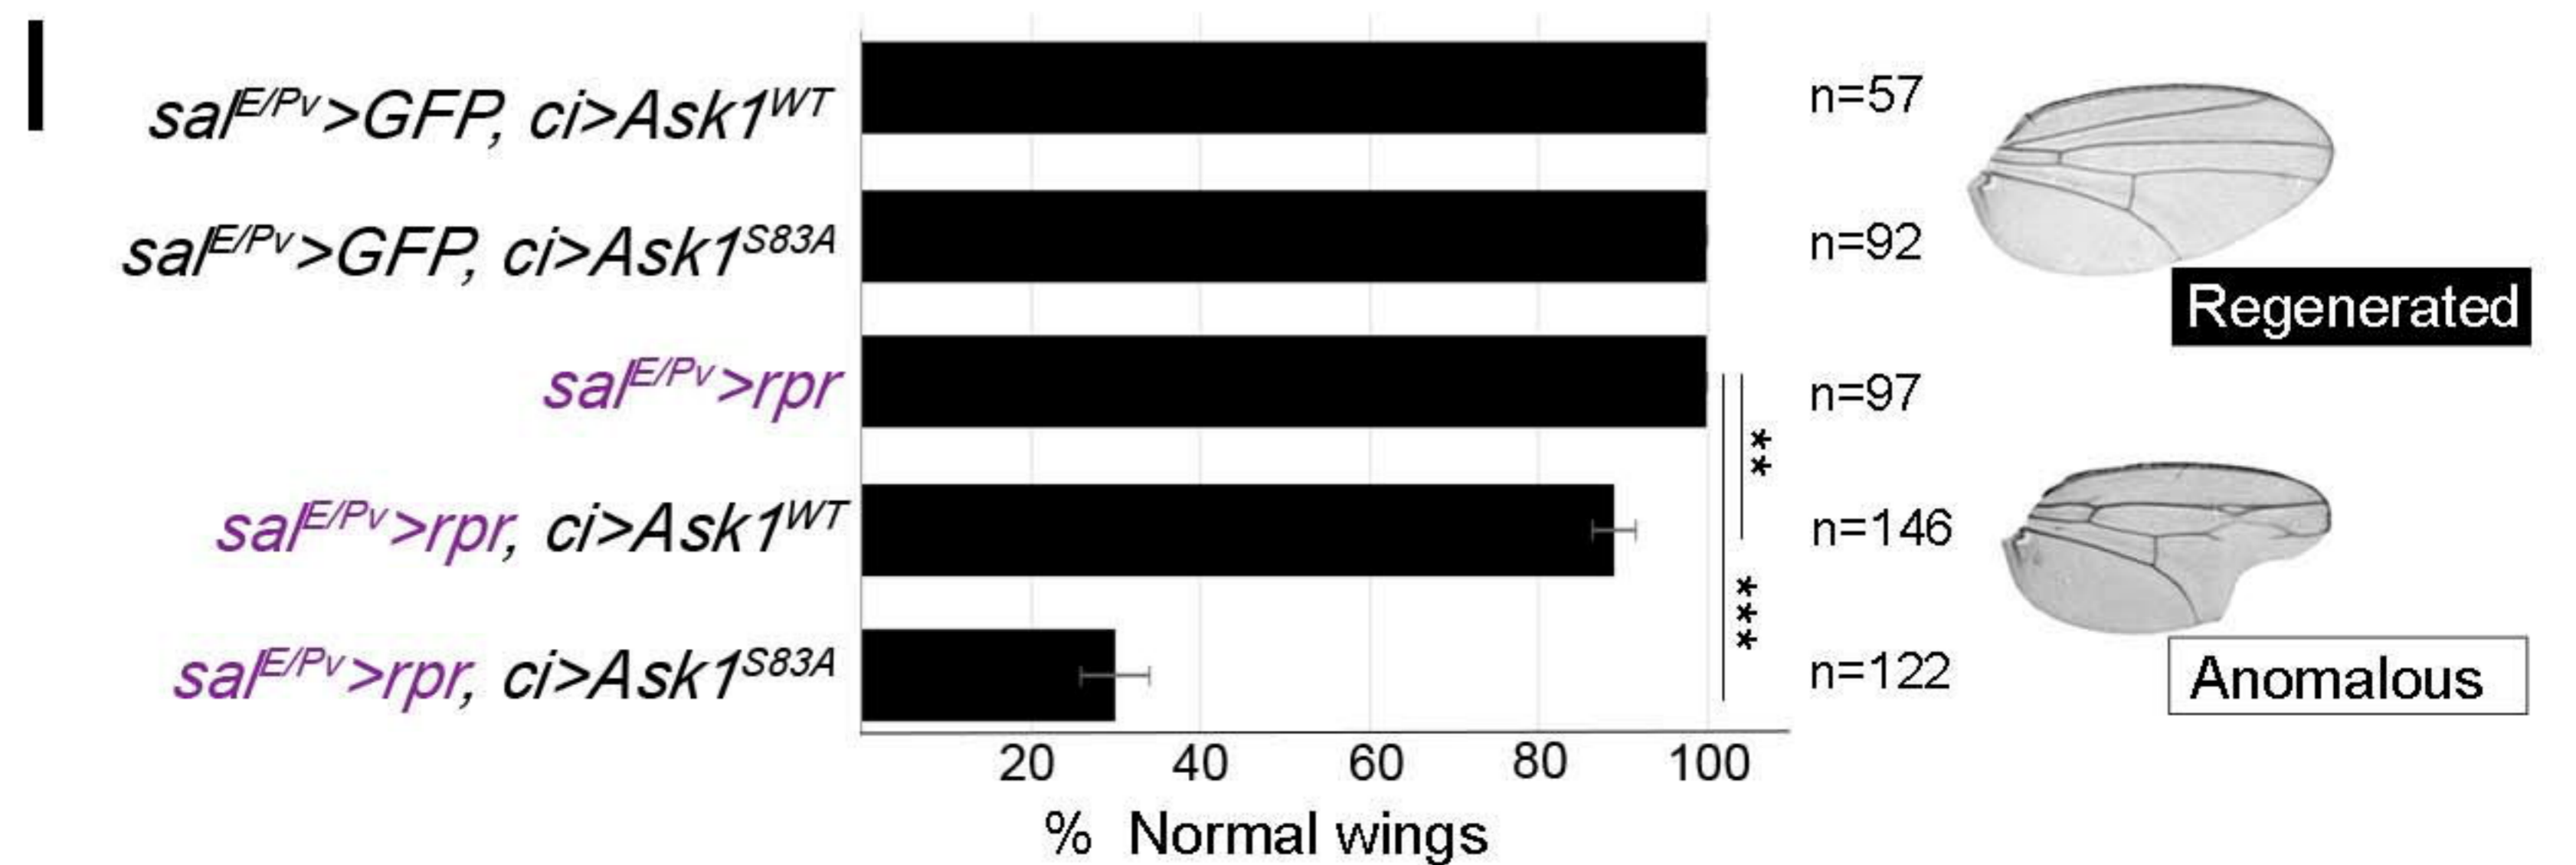

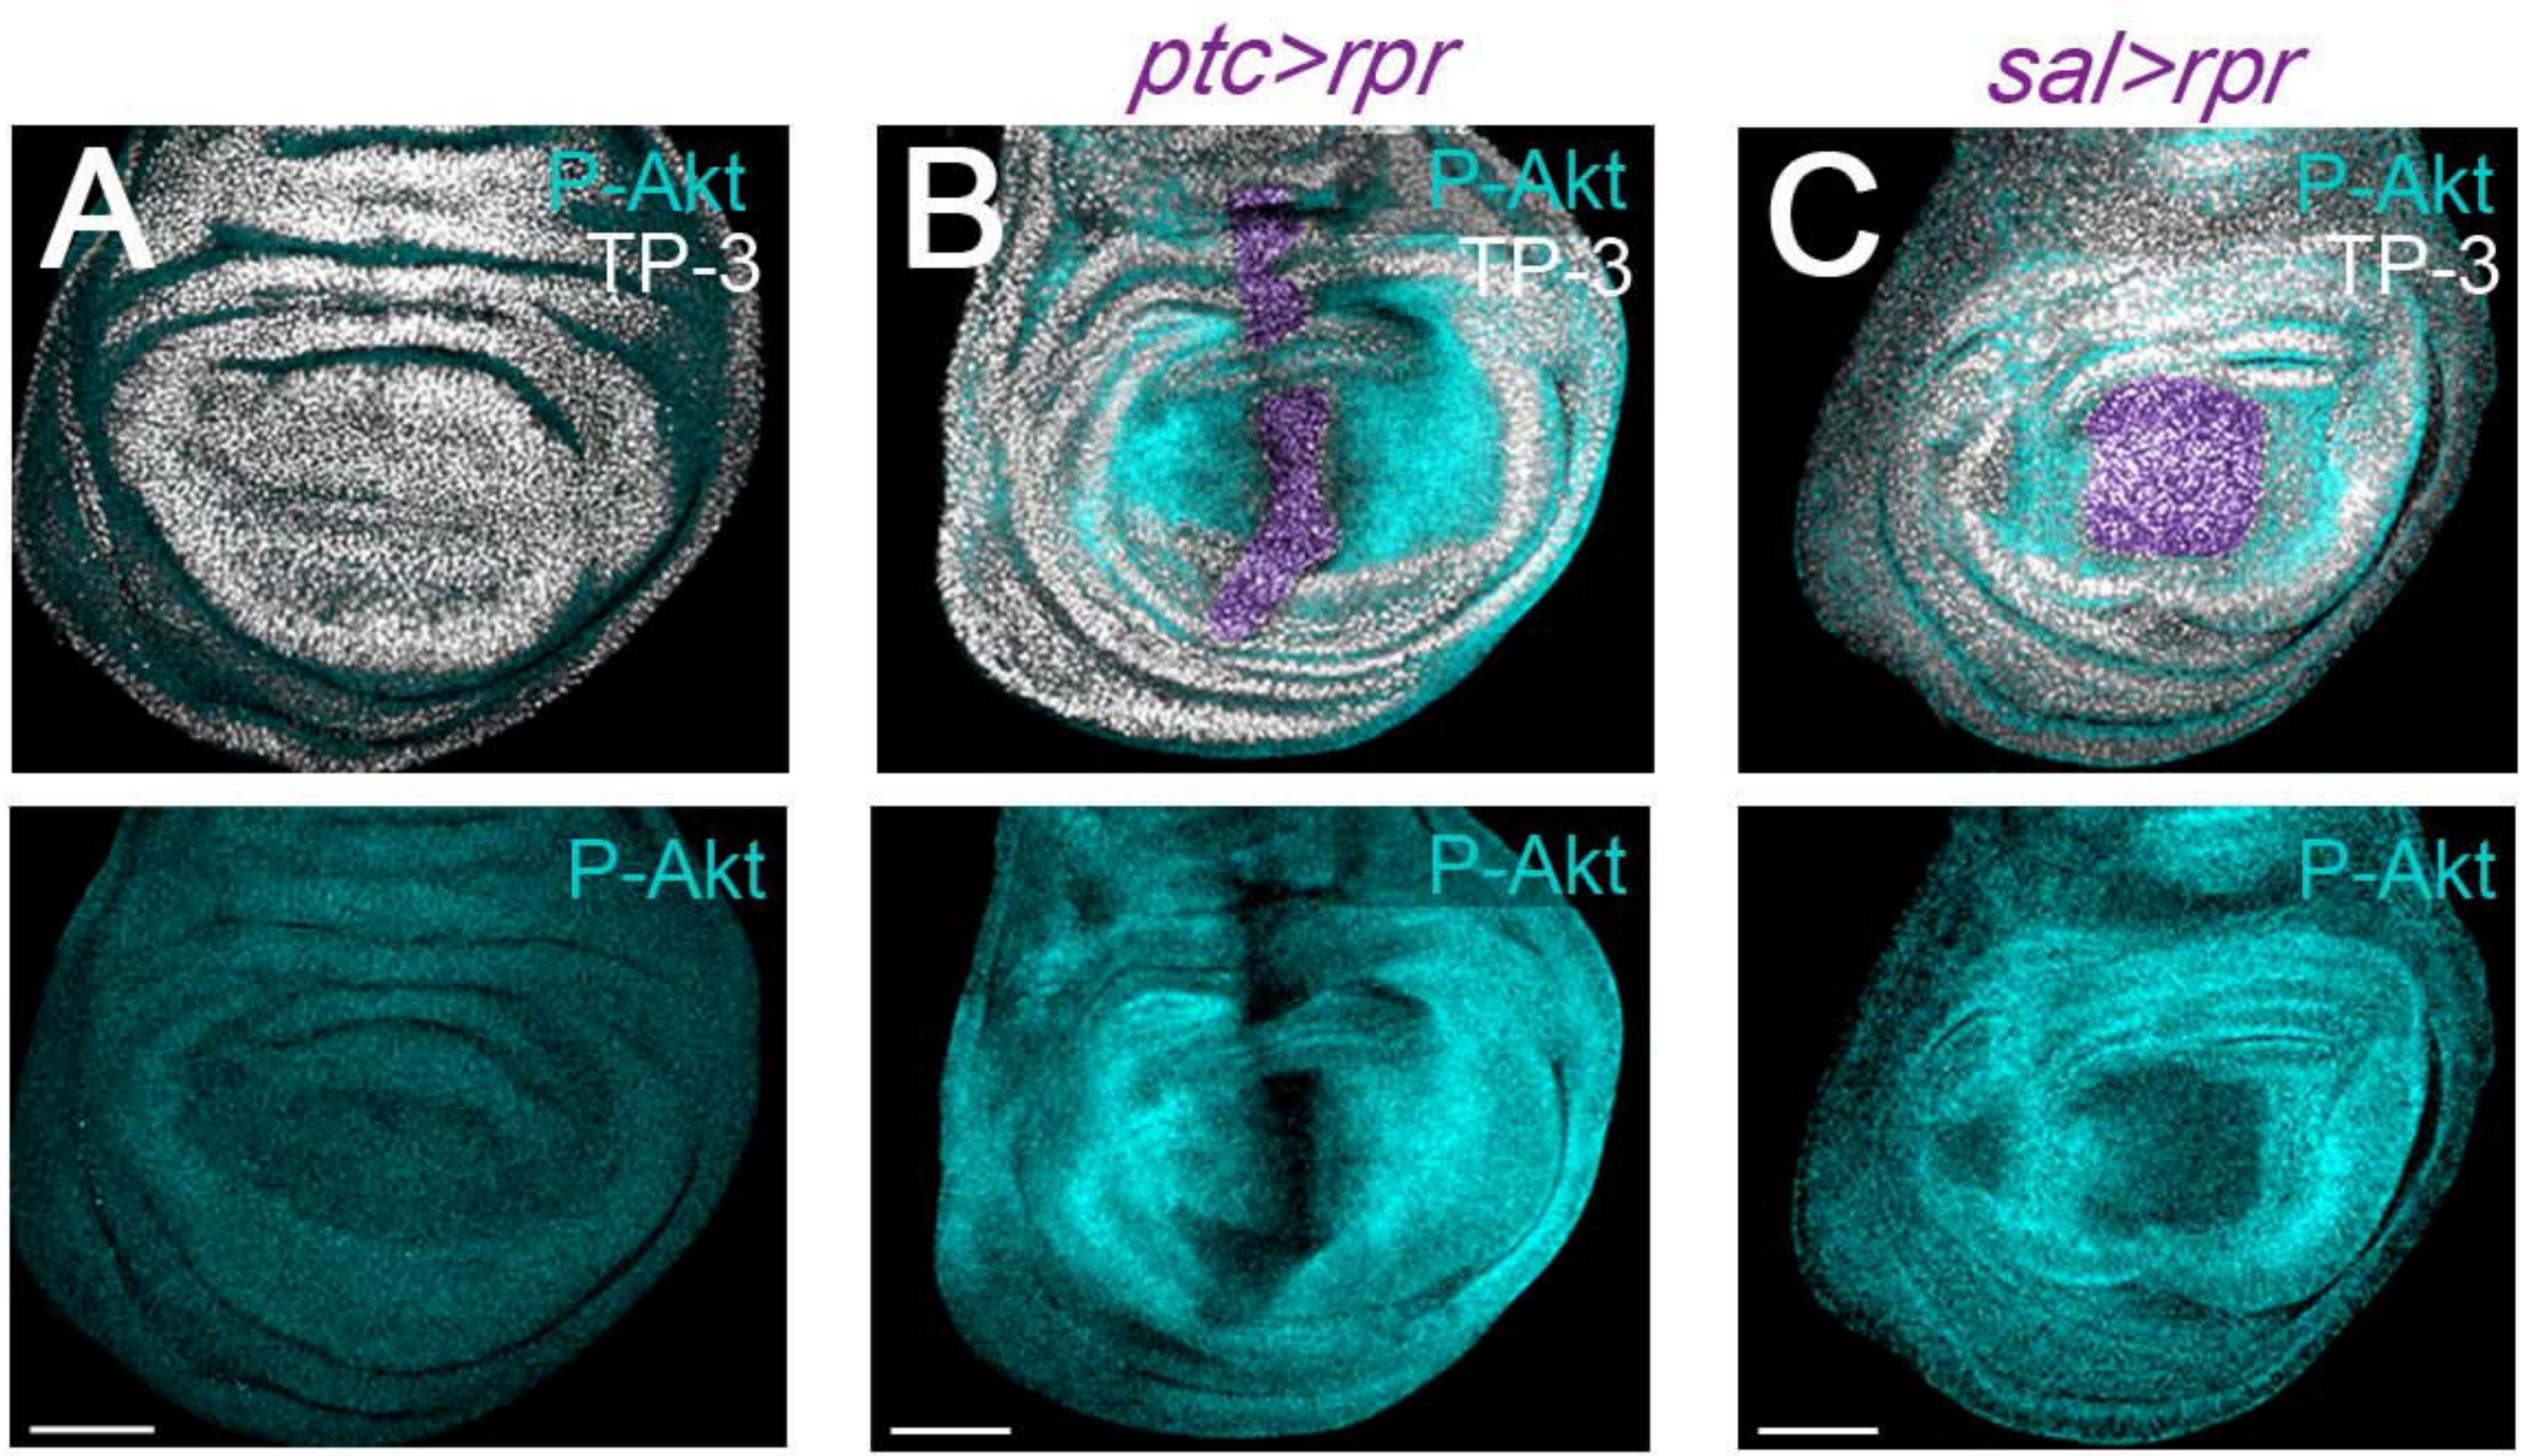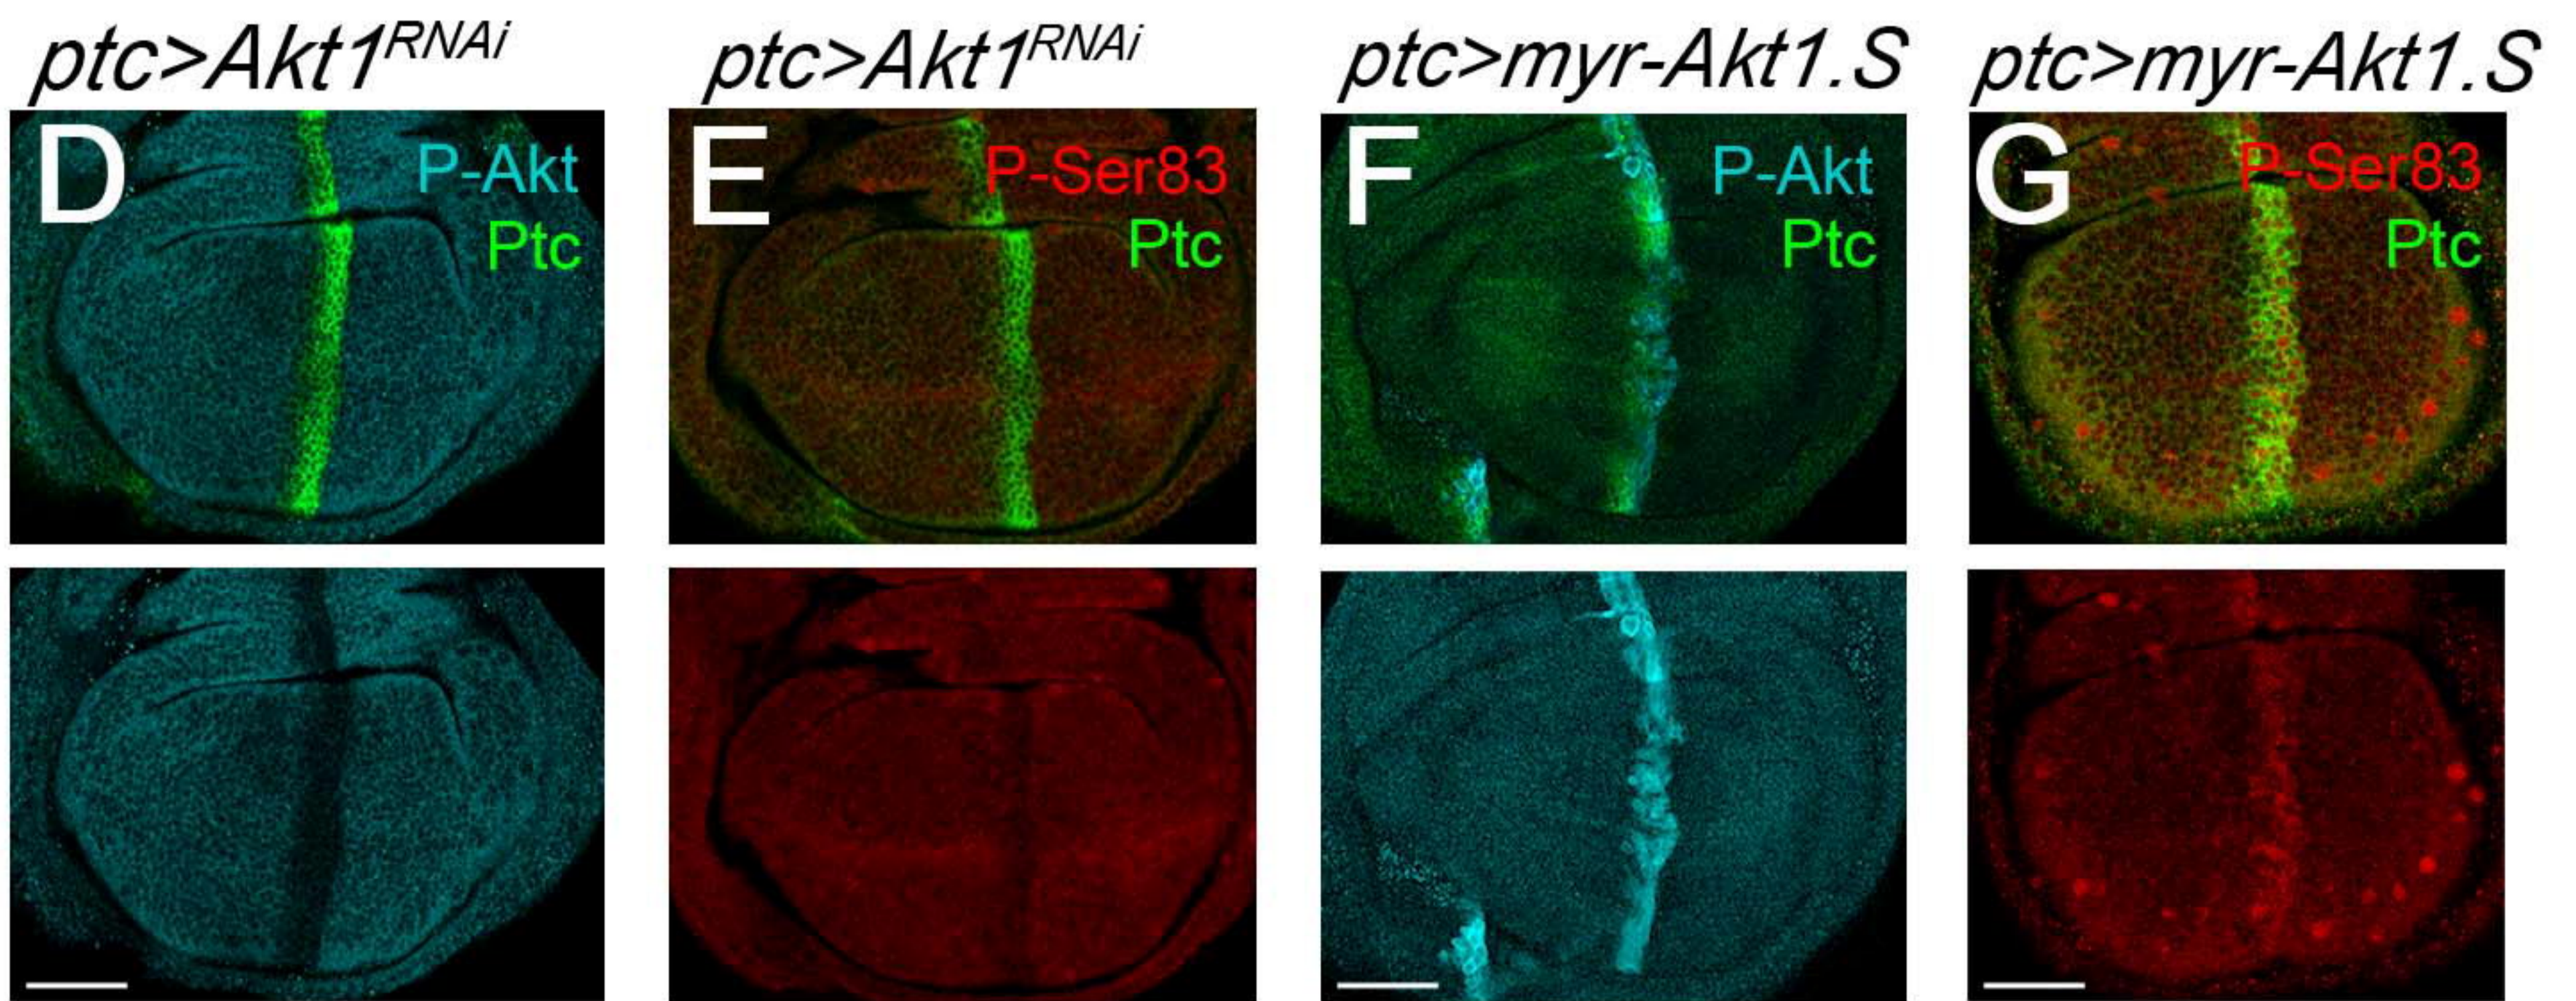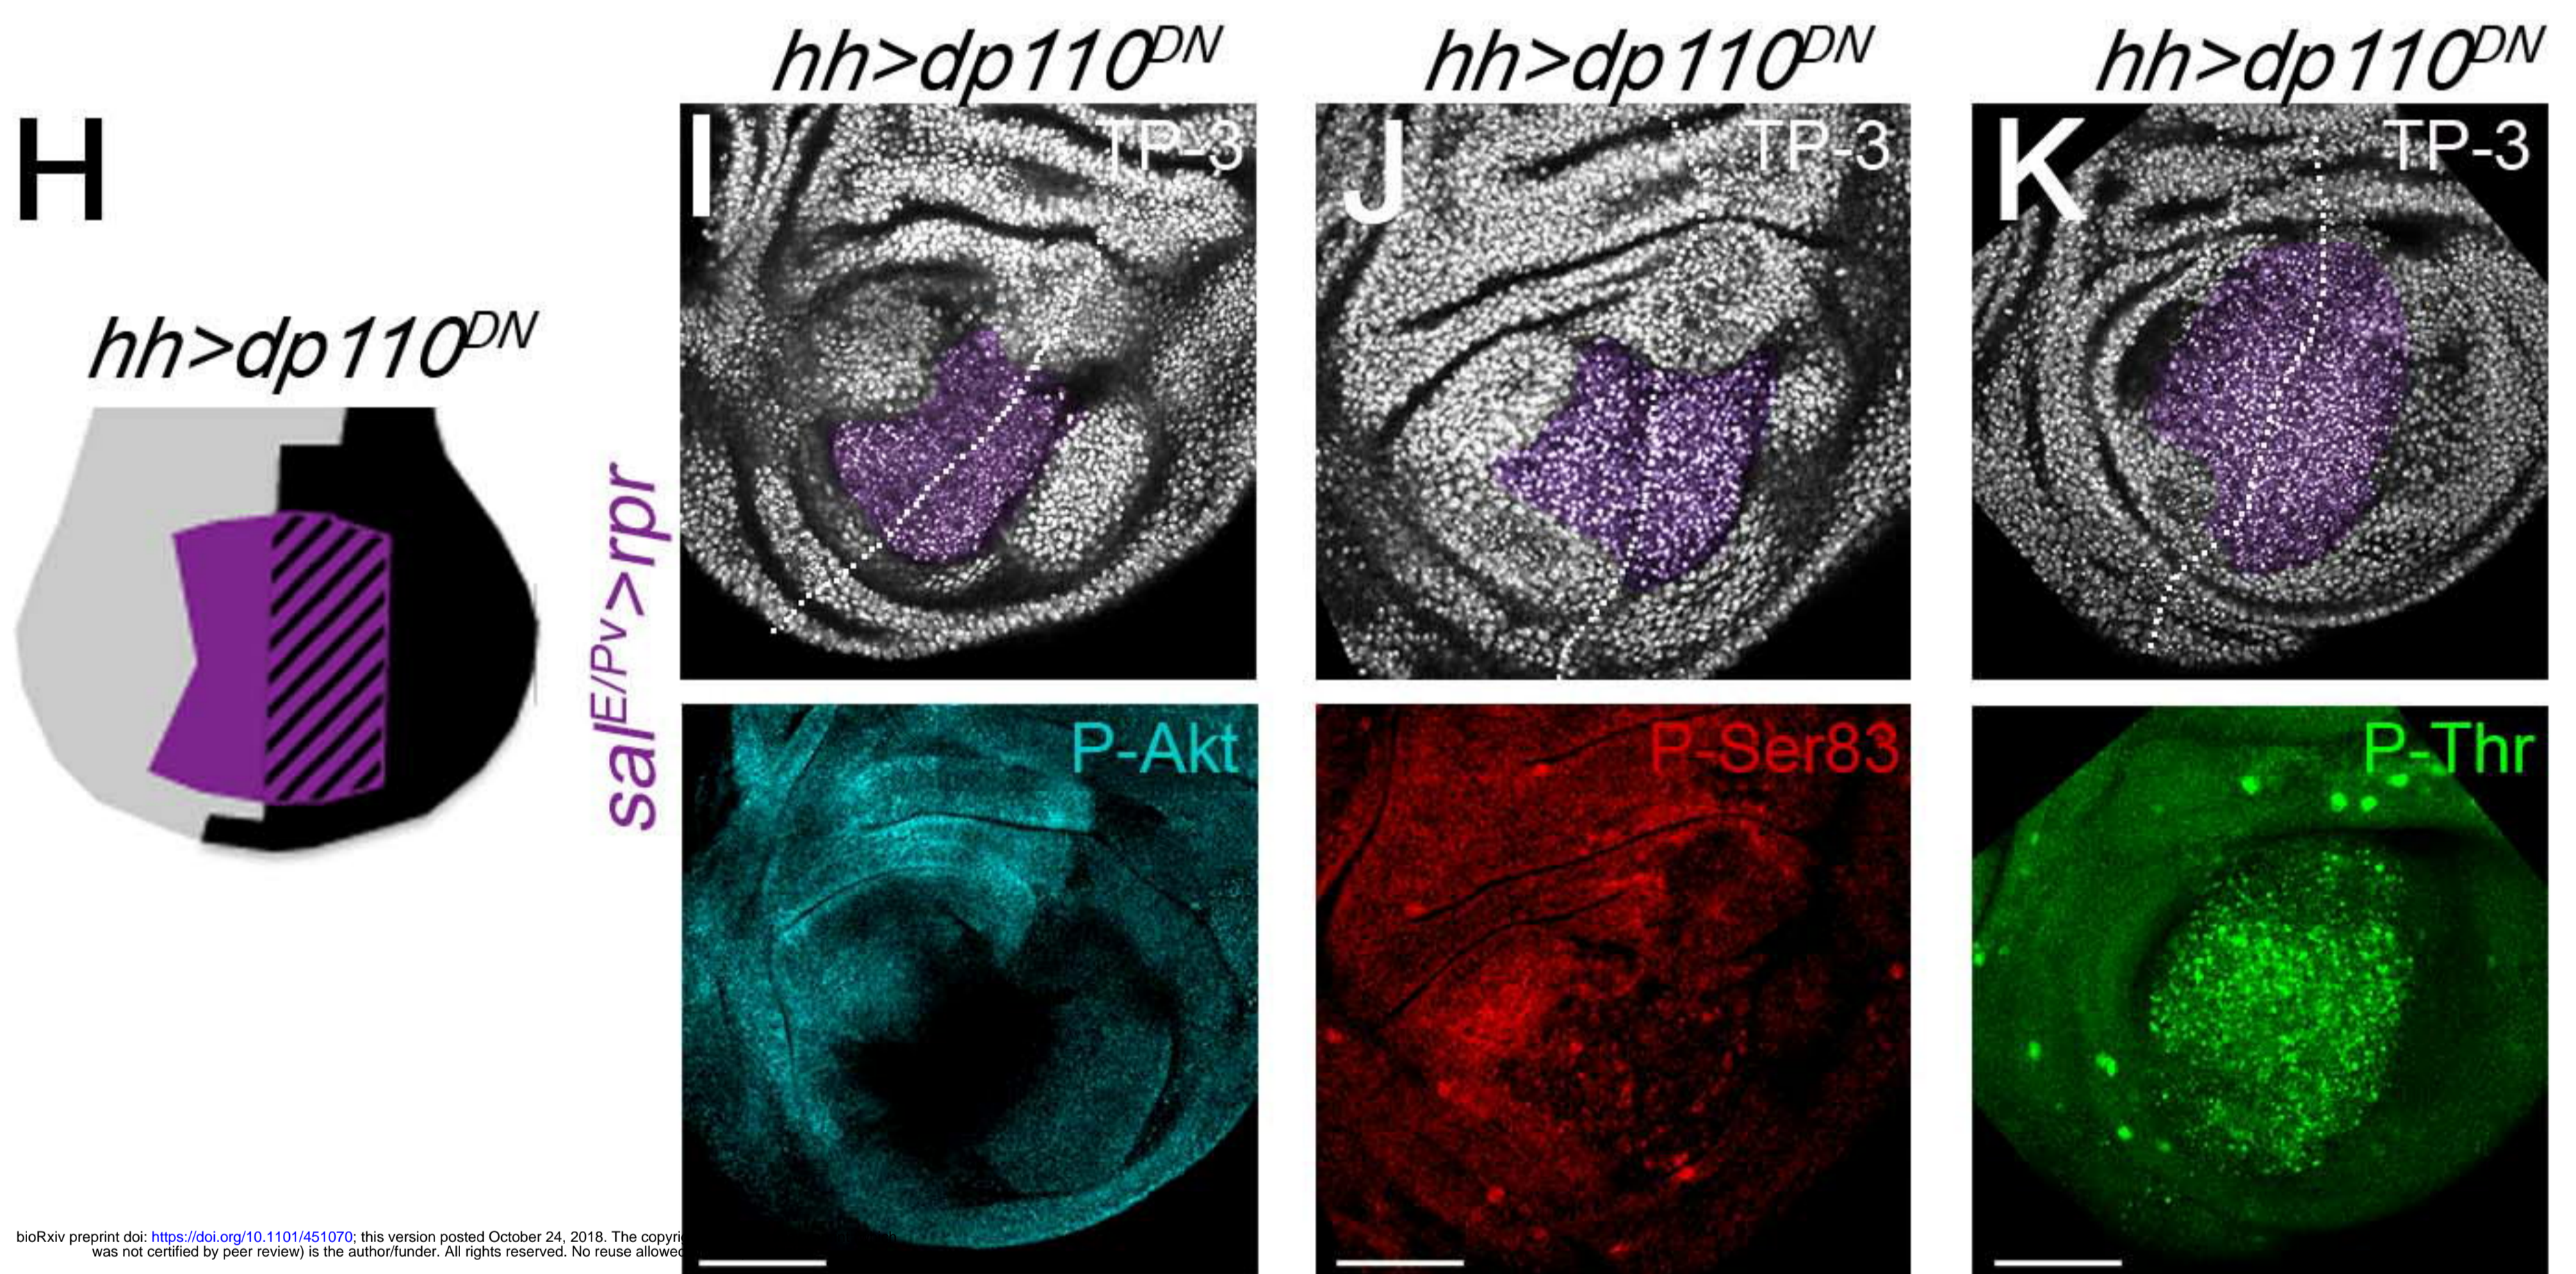

bioRxiv preprint doi: <https://doi.org/10.1101/451070>; this version posted October 24, 2018. The copyright holder for this preprint (which was not certified by peer review) is the author/funder. All rights reserved. No reuse allowed without permission.

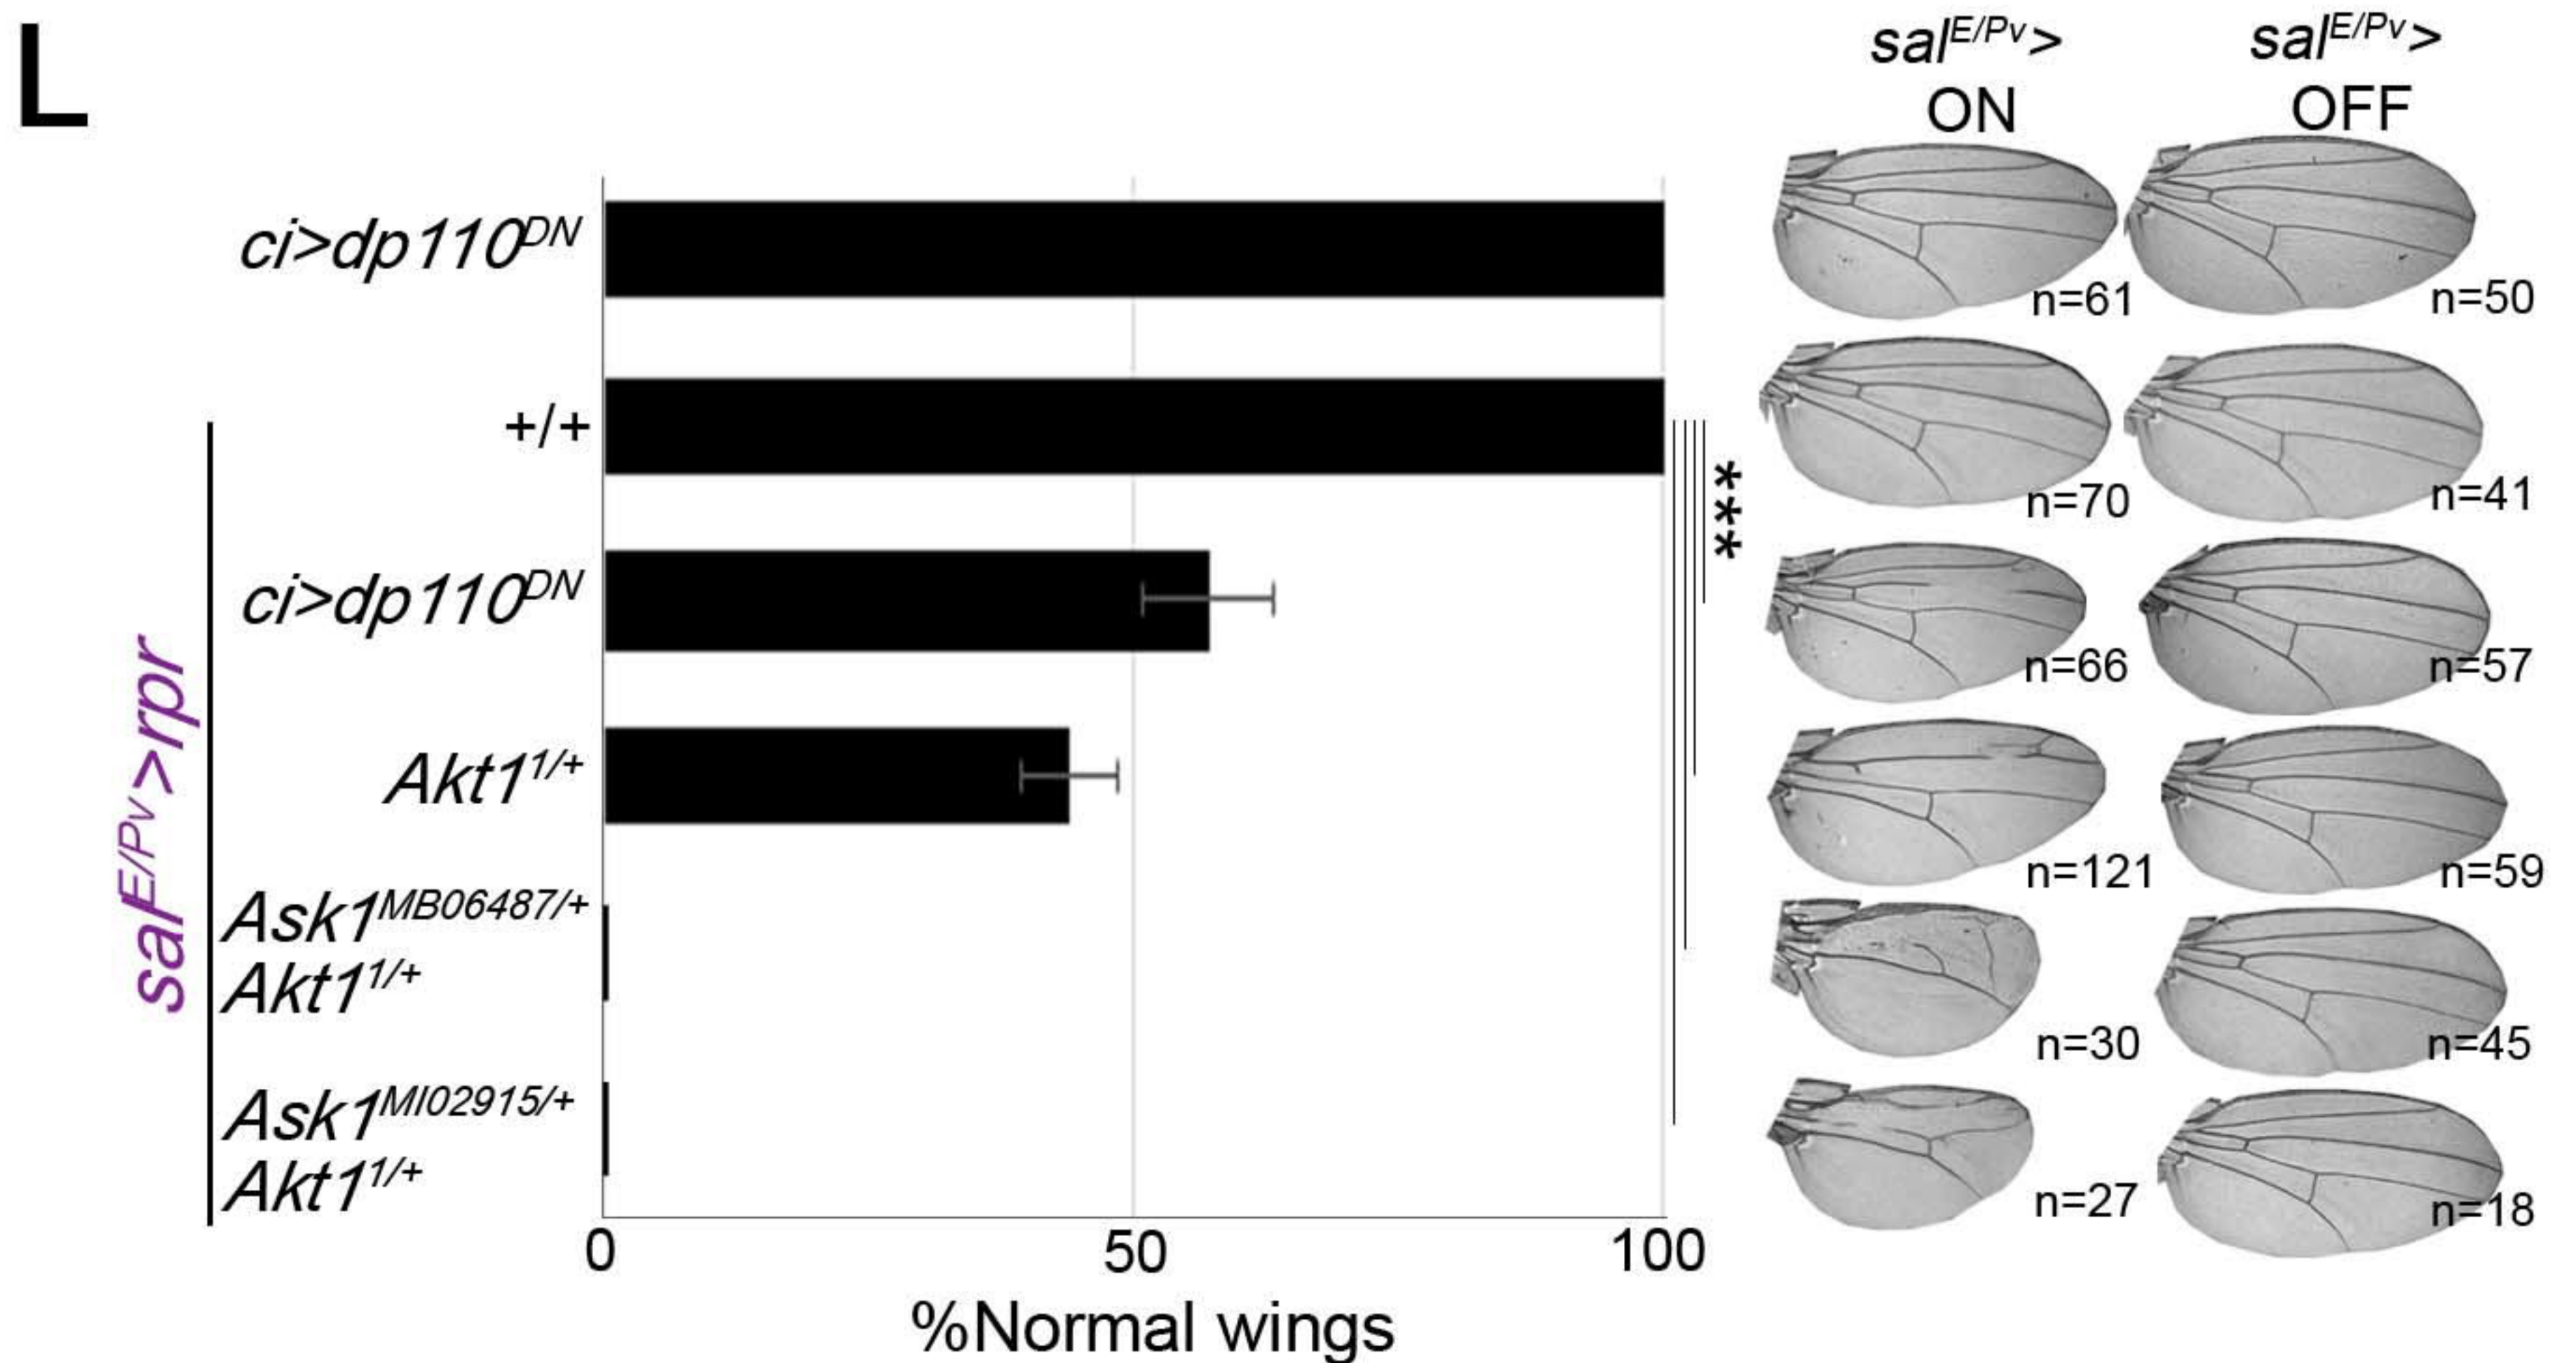

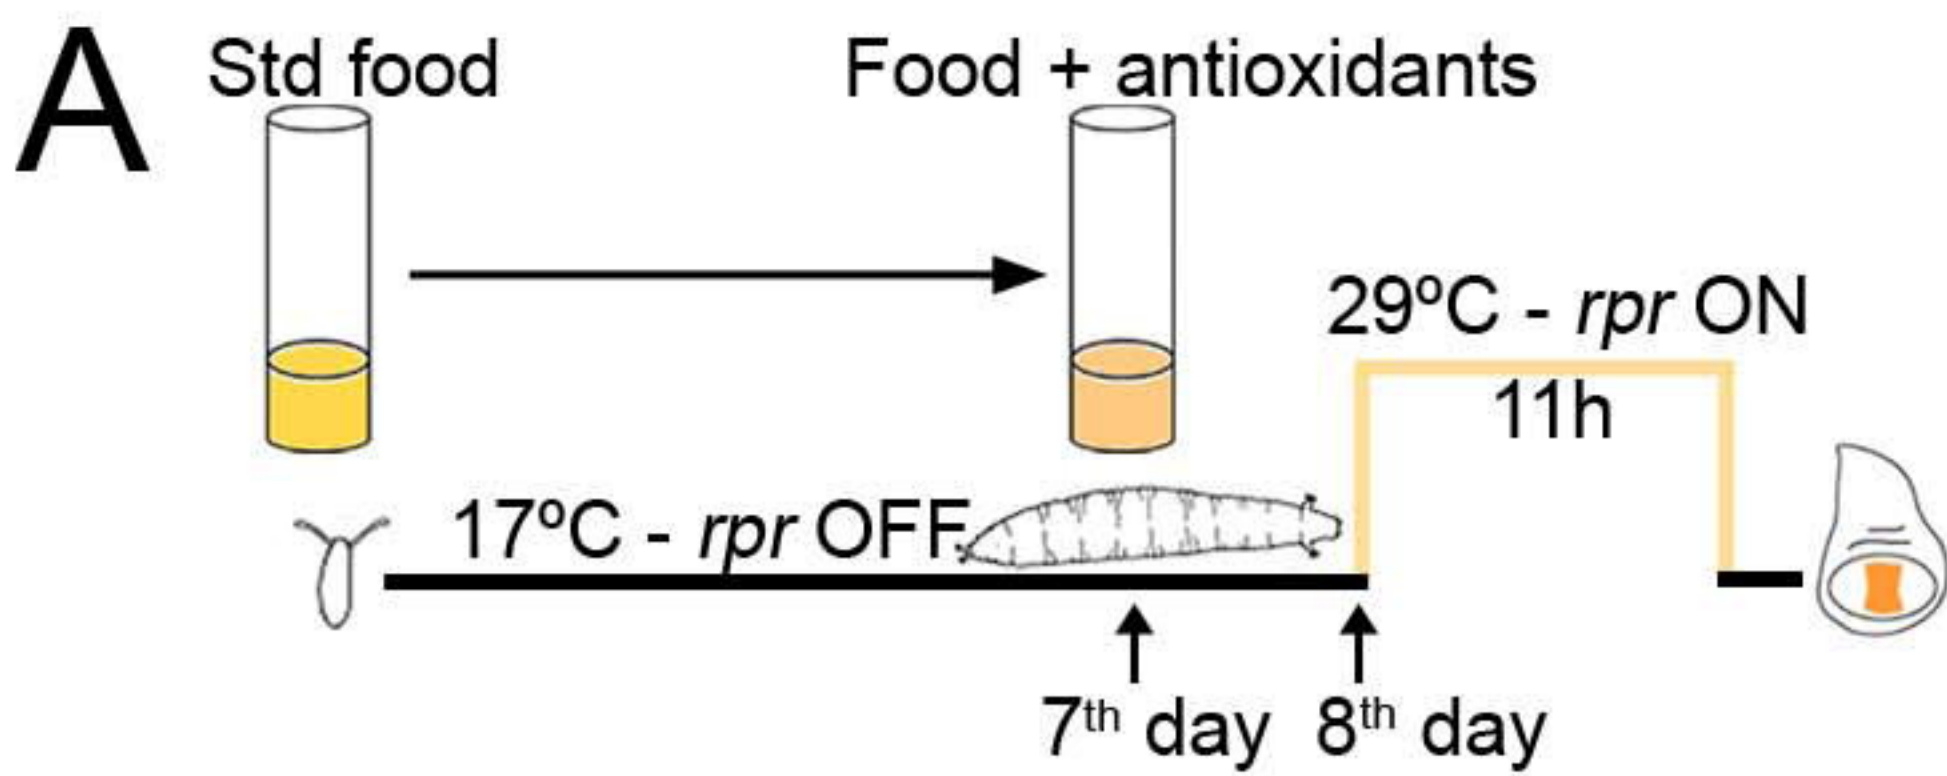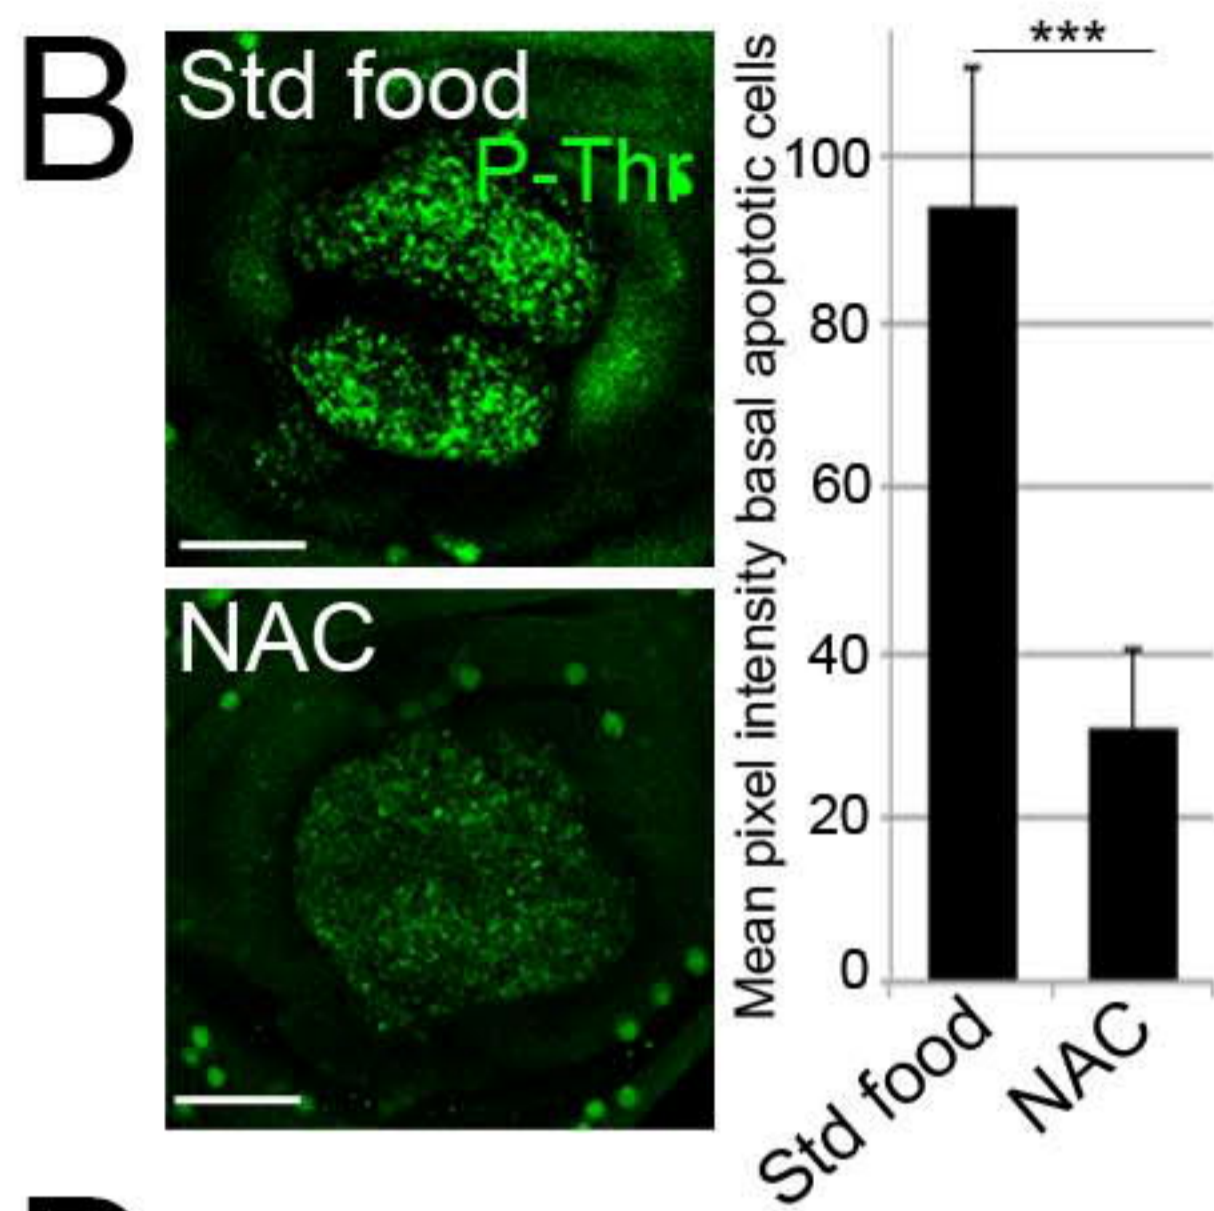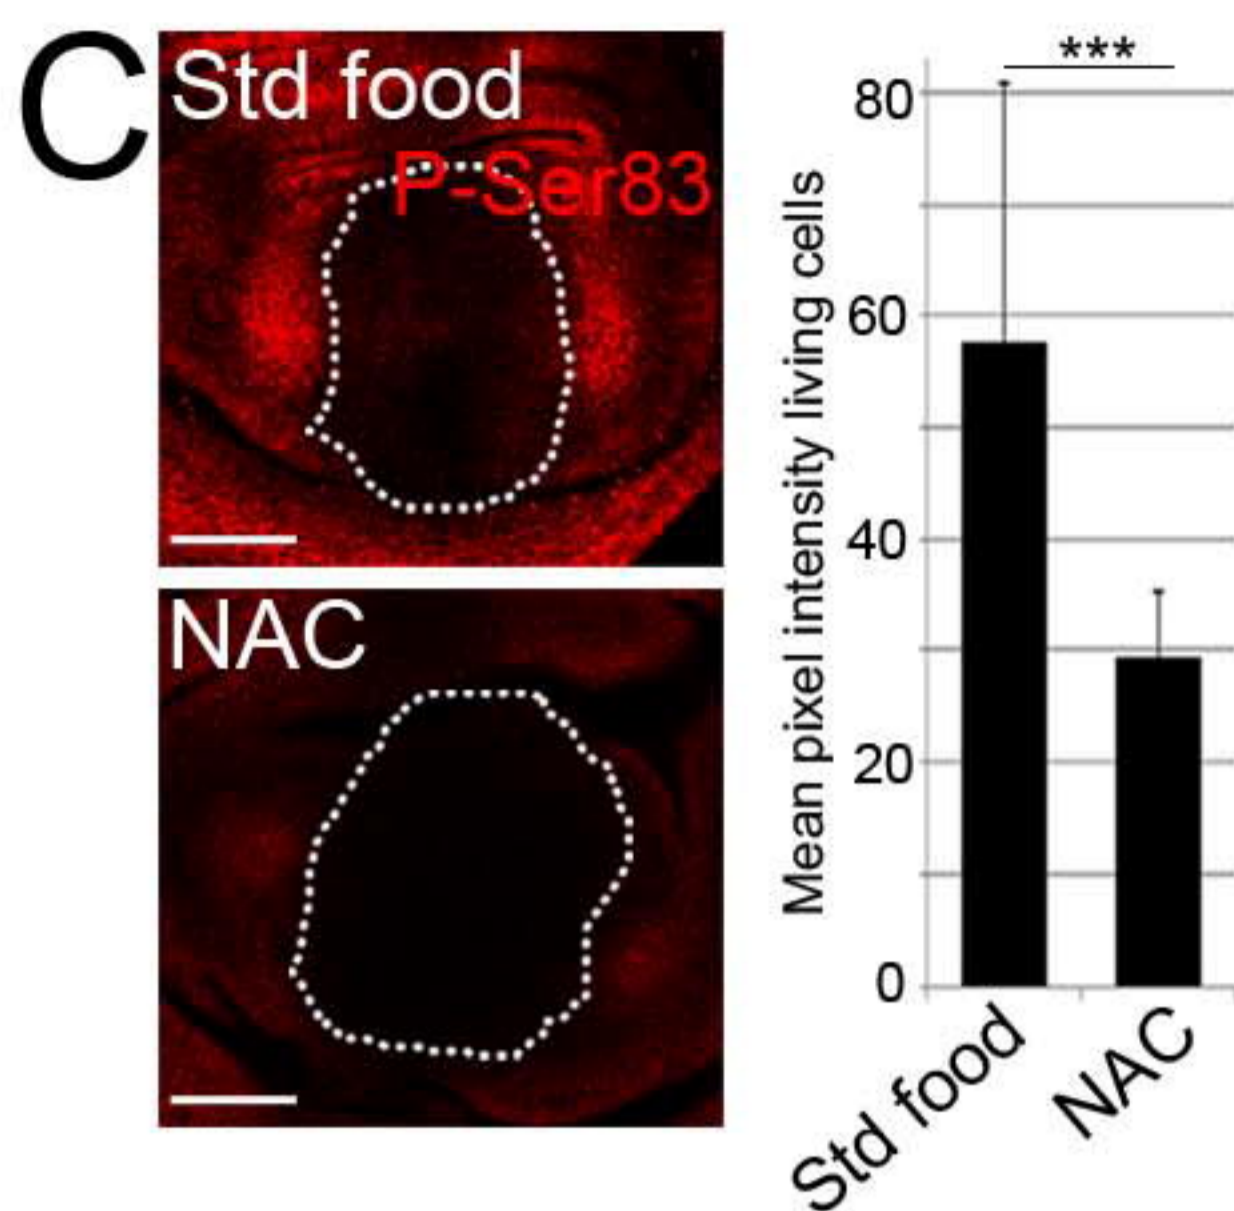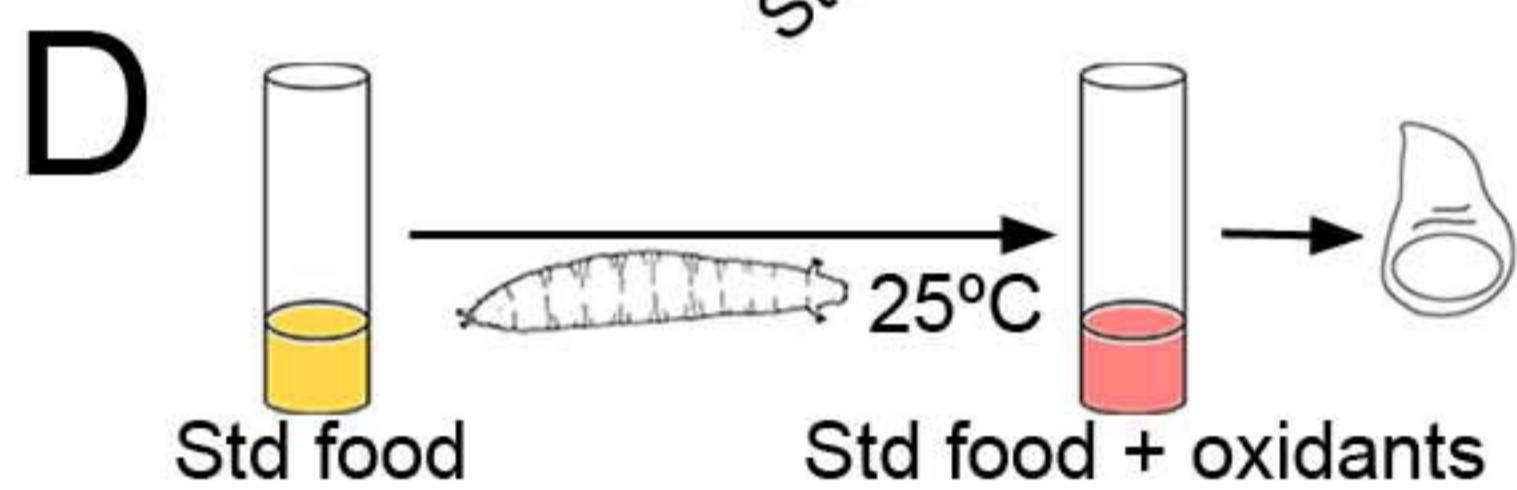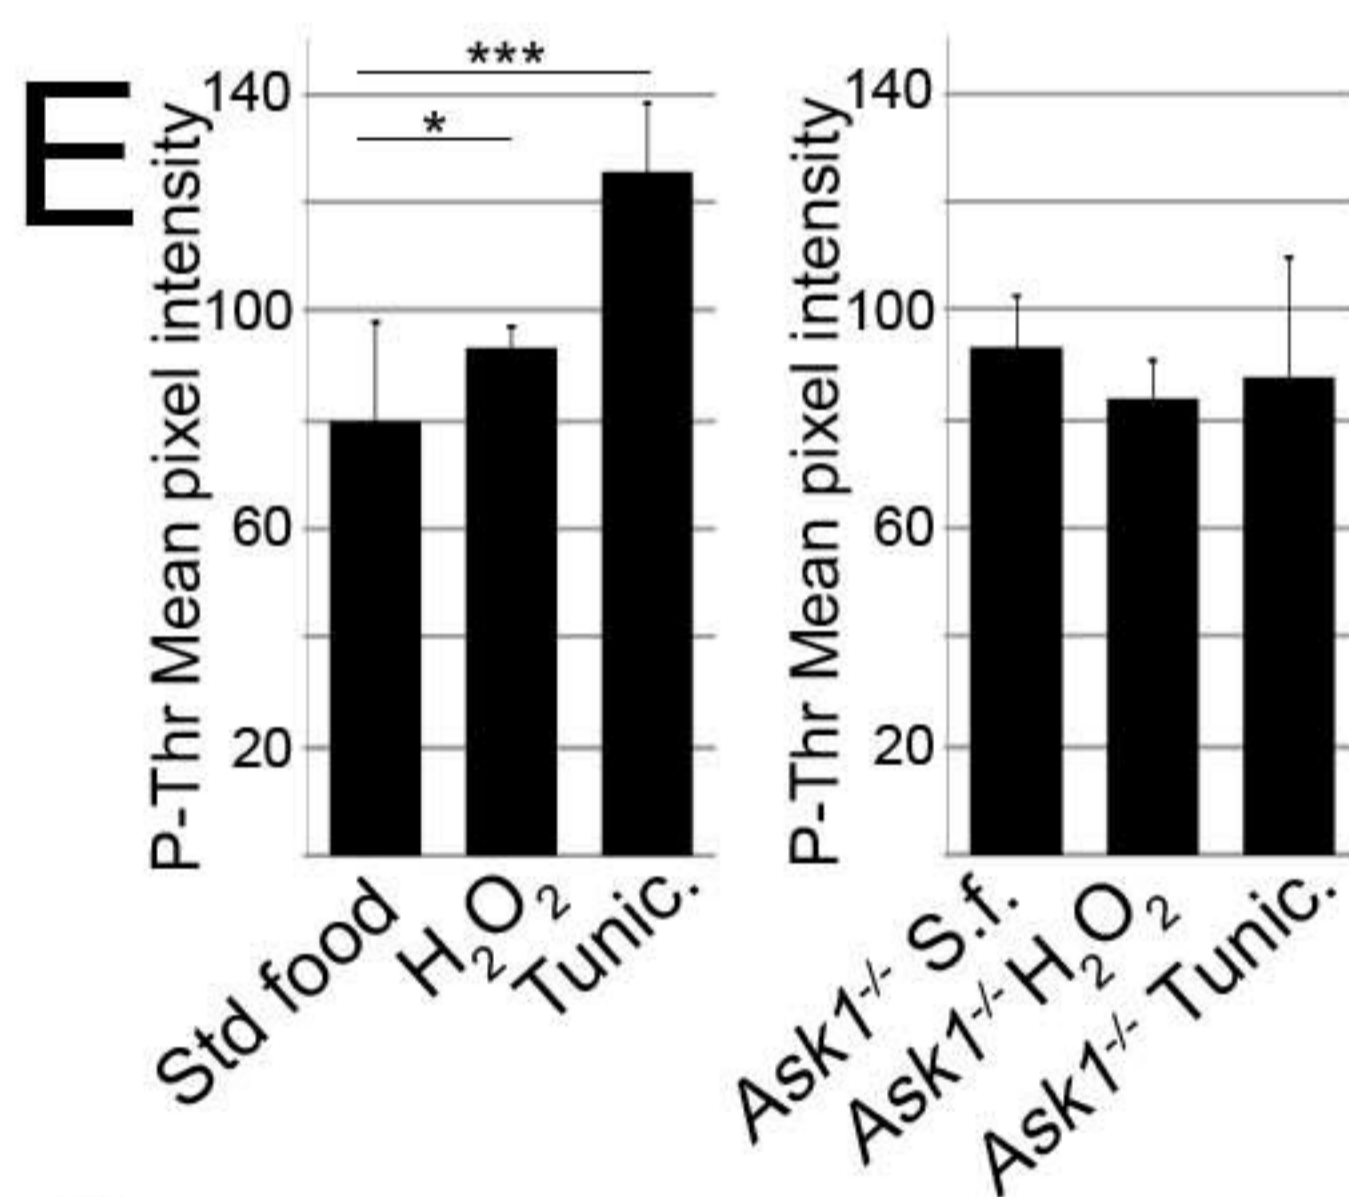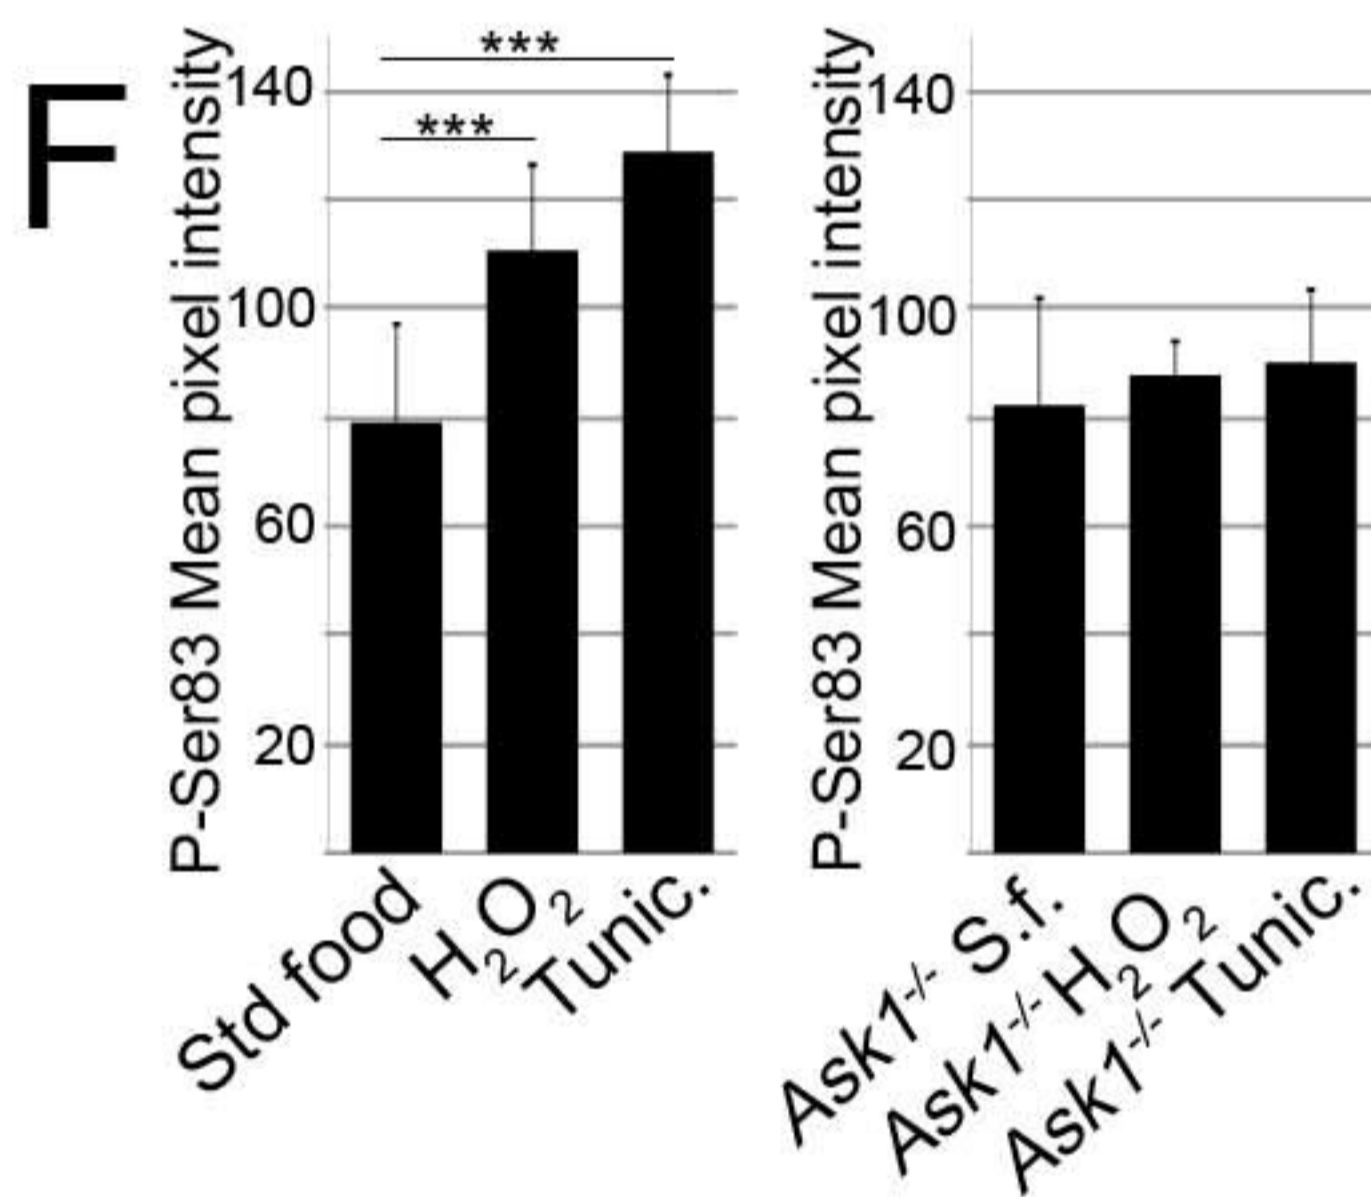

**G** High Oxidative Stress

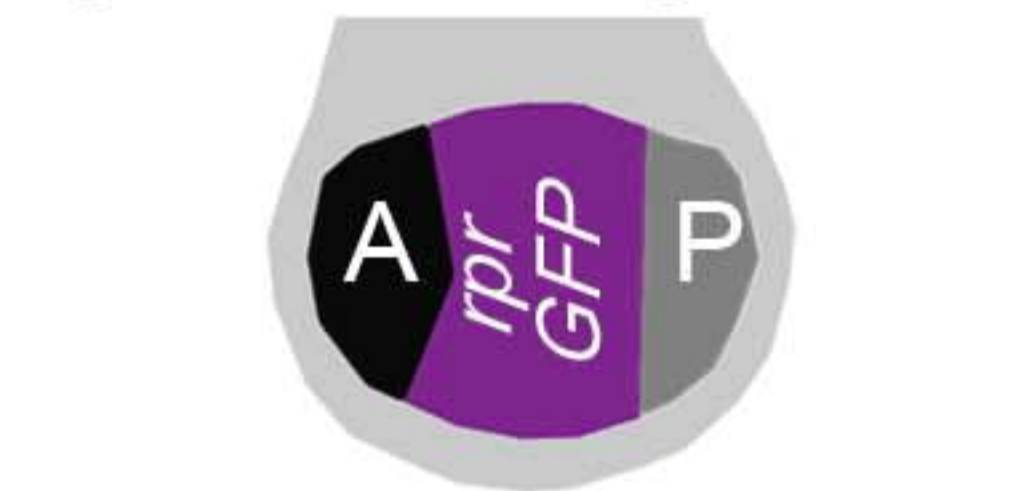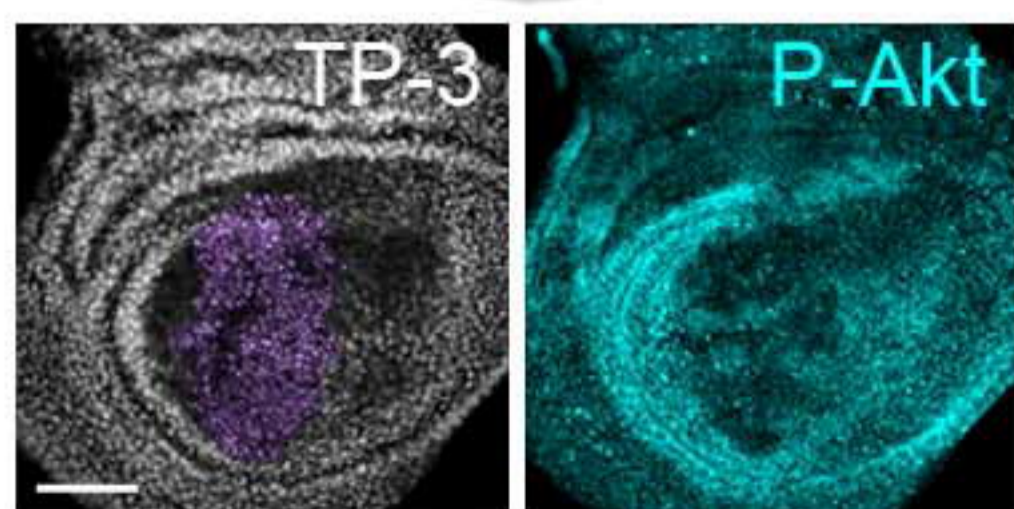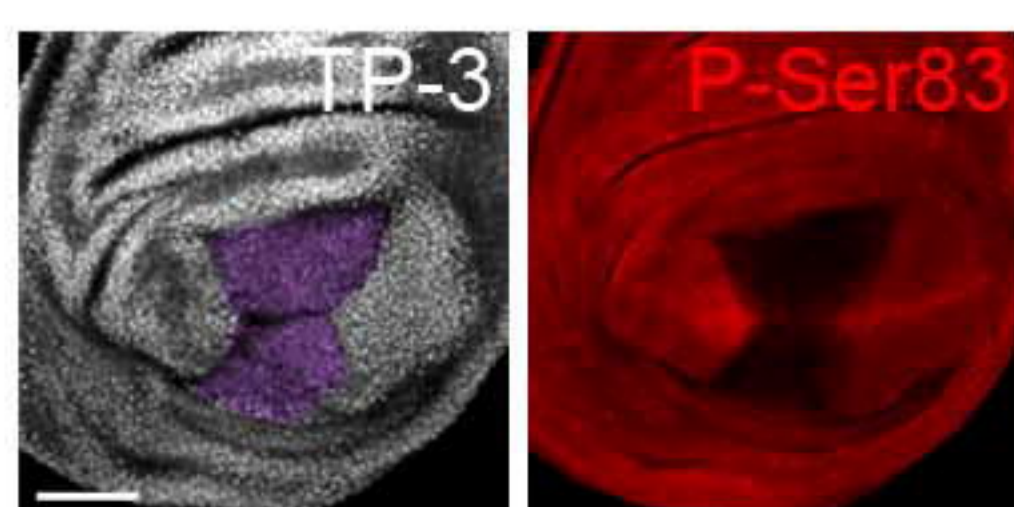

*sal<sup>E/PV</sup>>rpr, GFP*

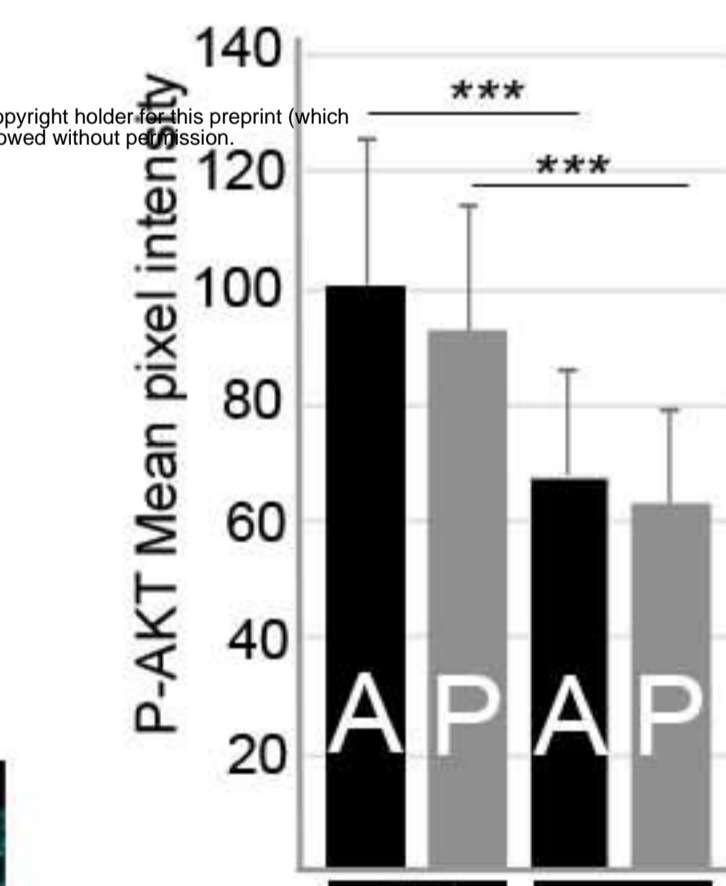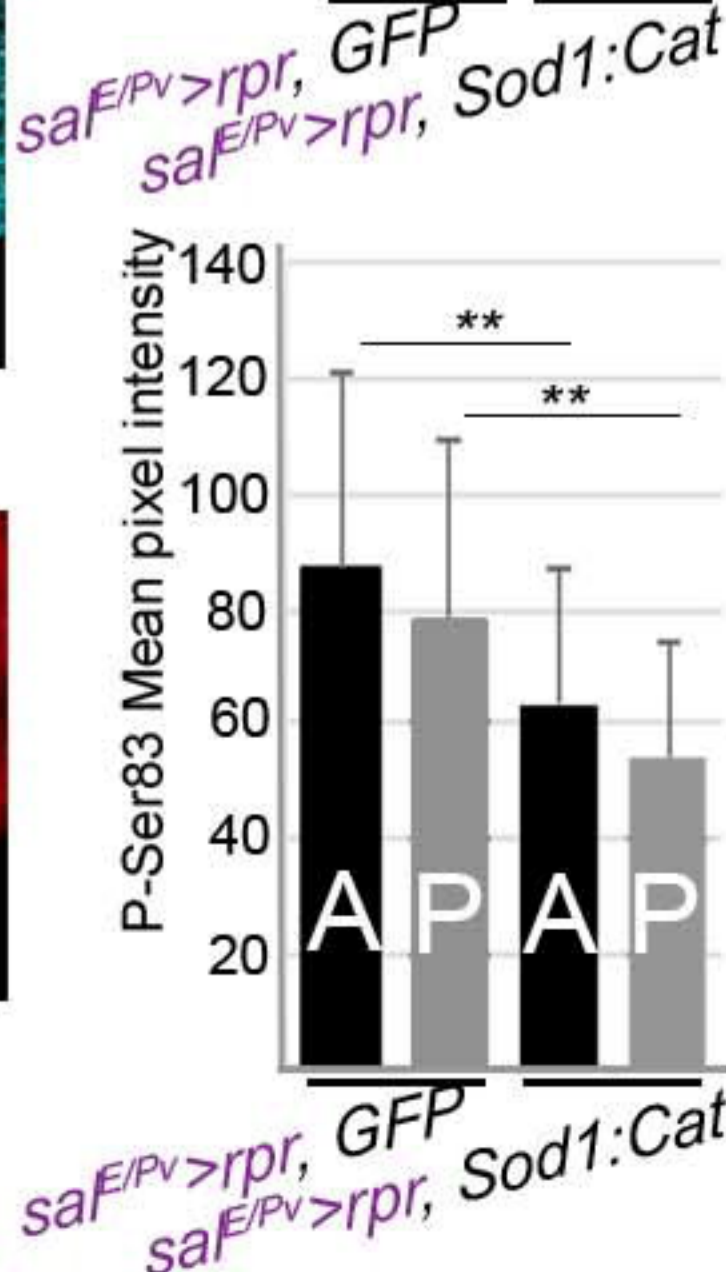

*sal<sup>E/PV</sup>>rpr, GFP*  
*sal<sup>E/PV</sup>>rpr, Sod1:Cat*

Low Oxidative Stress

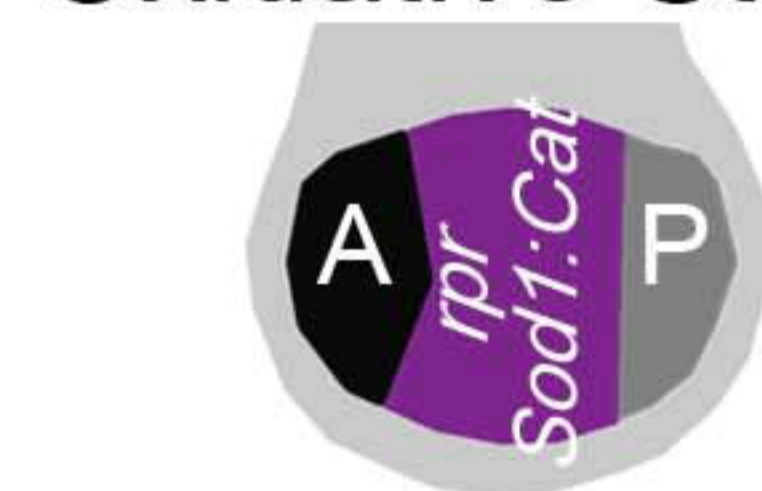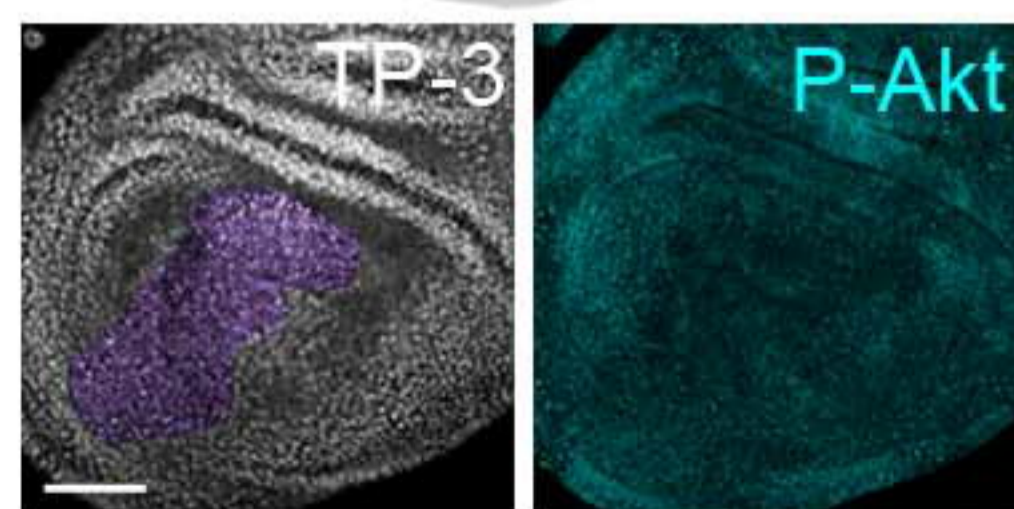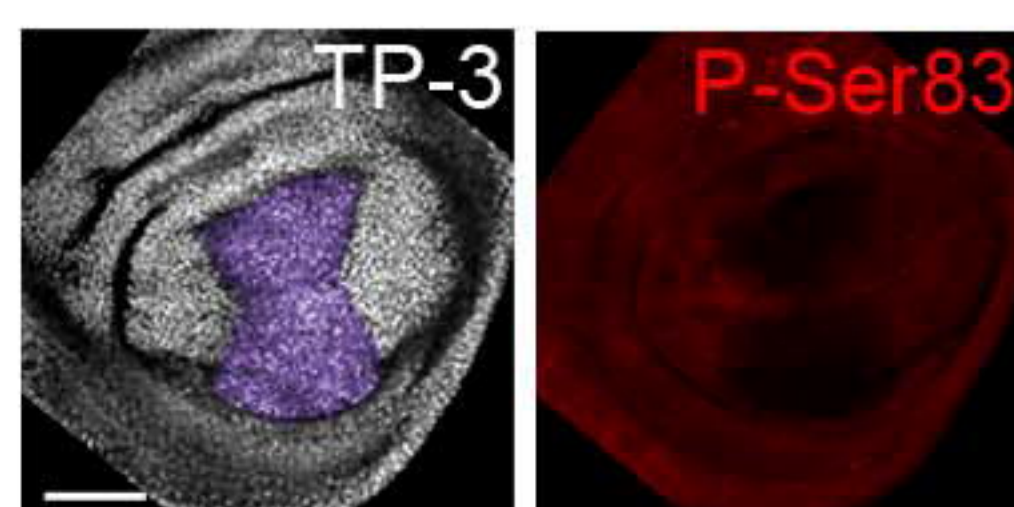

*sal<sup>E/PV</sup>>rpr, Sod1:Cat*

p38

JNK

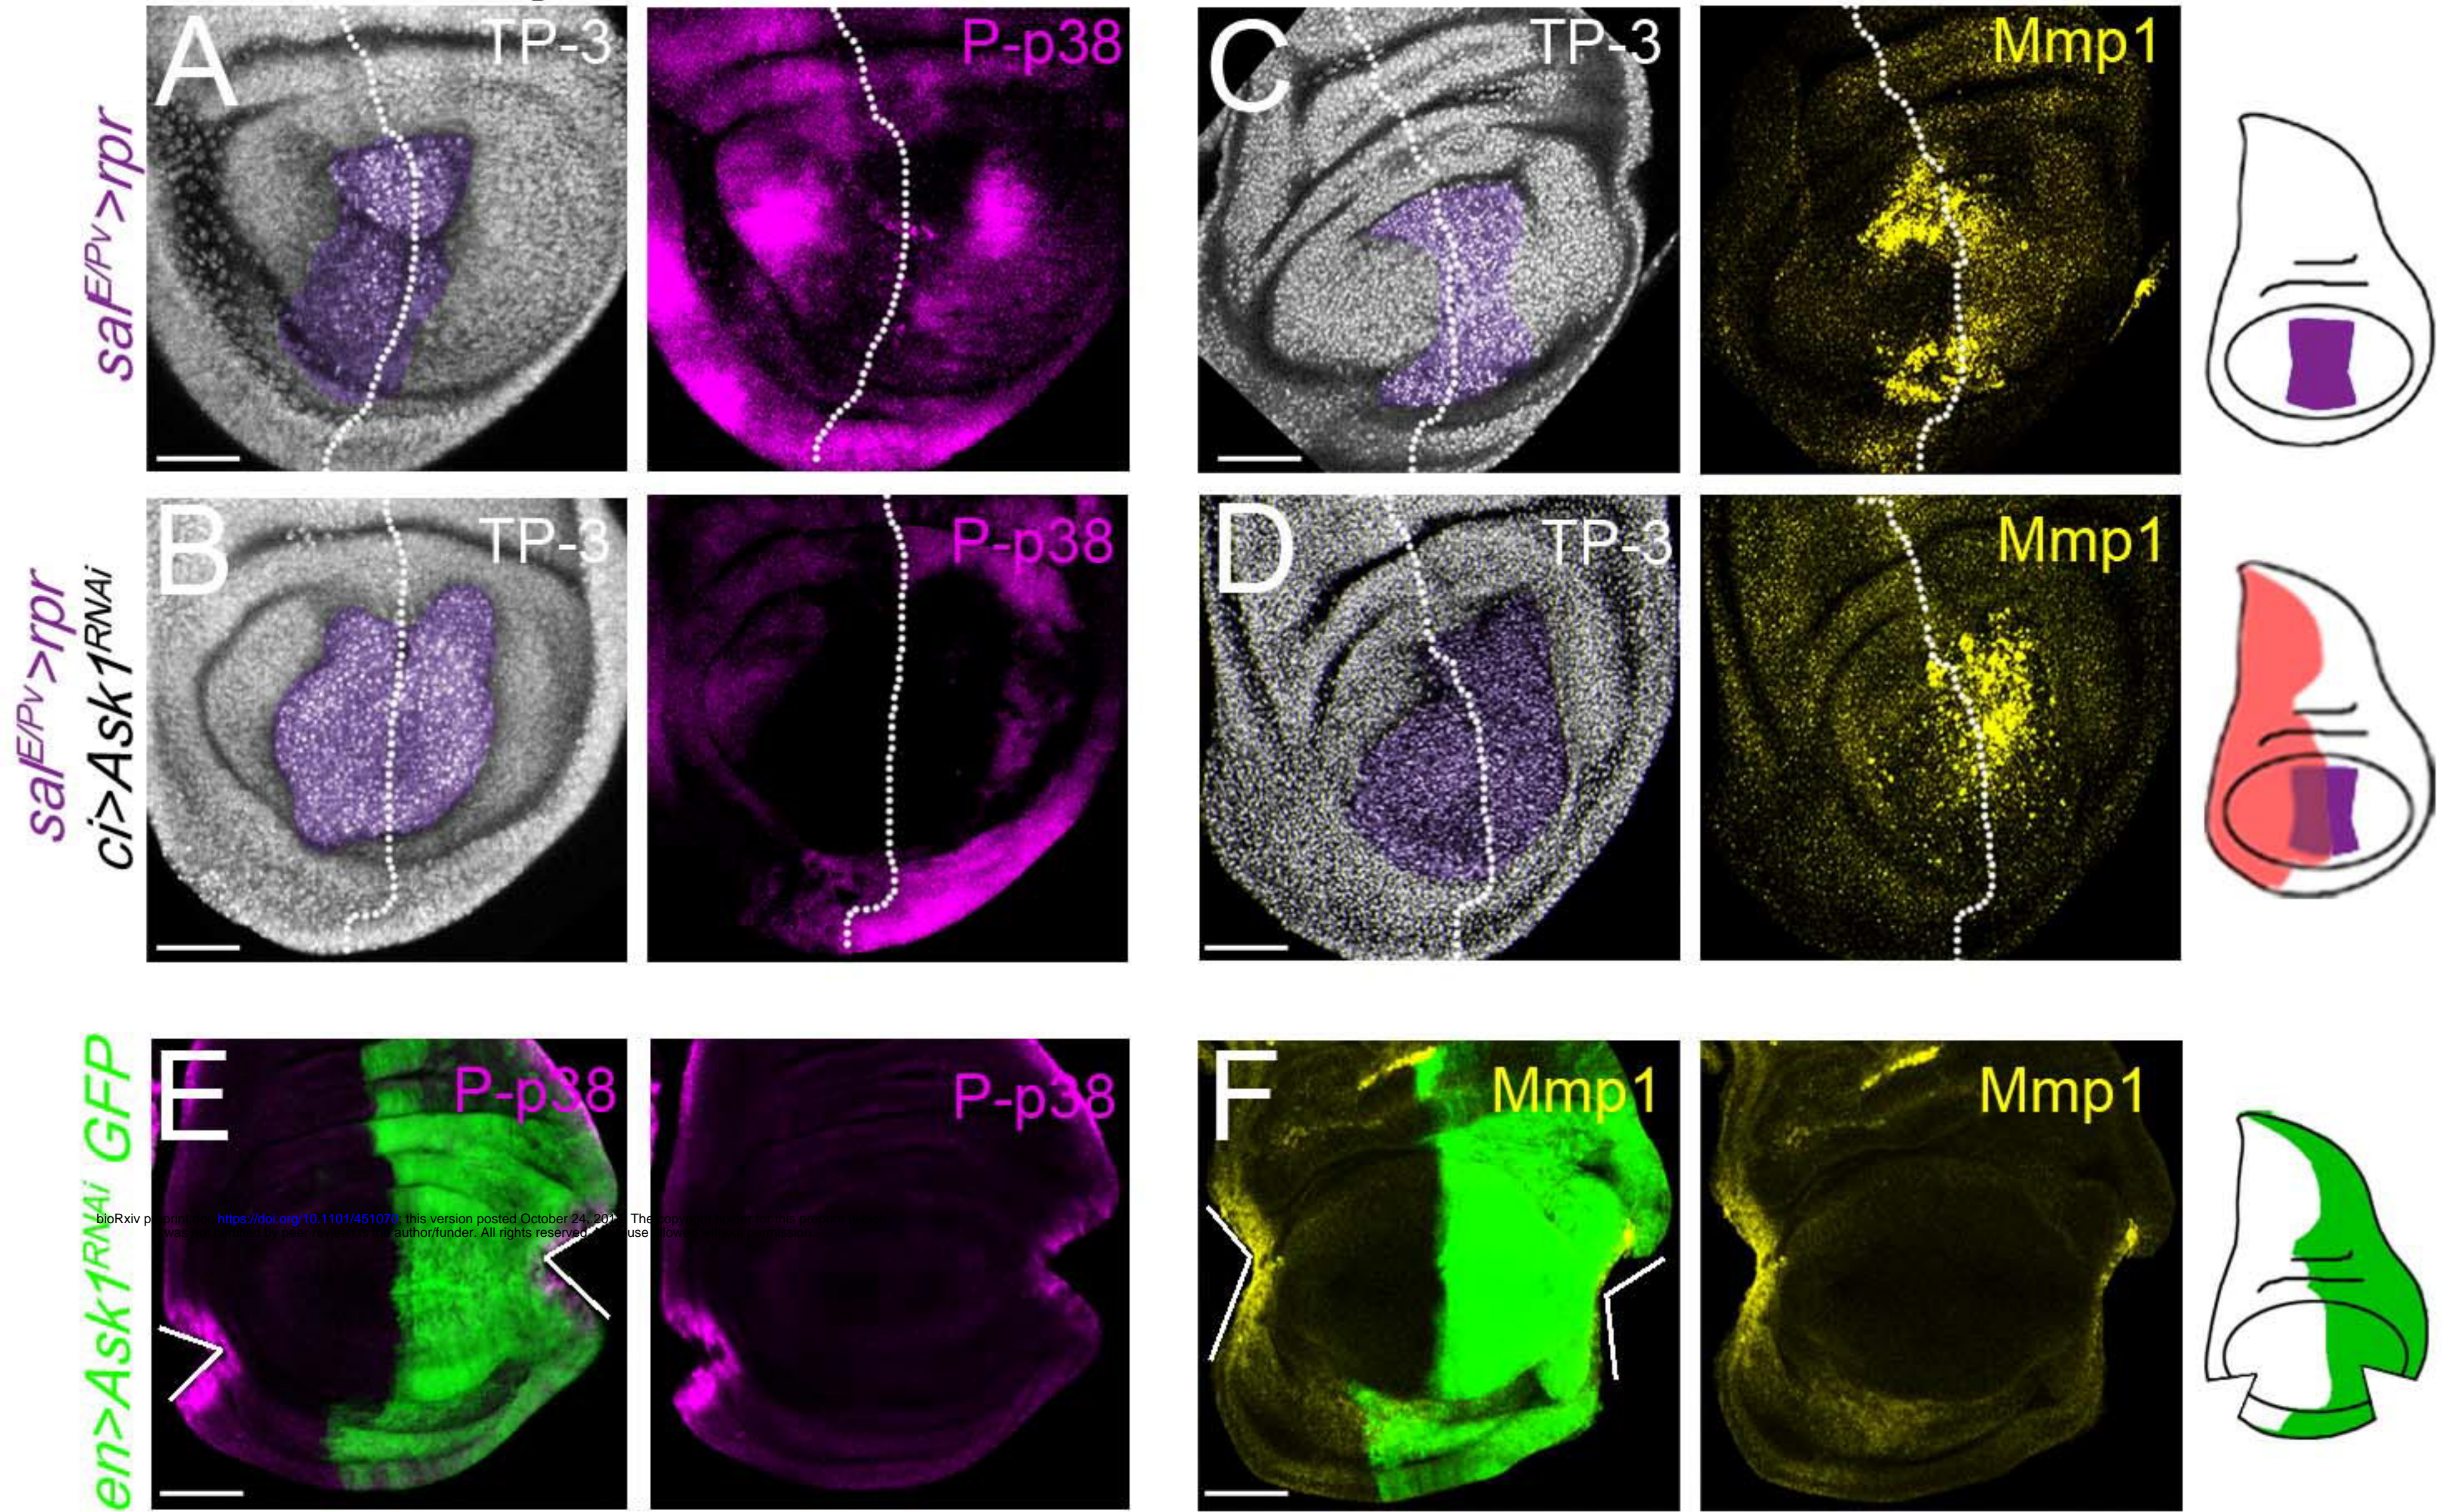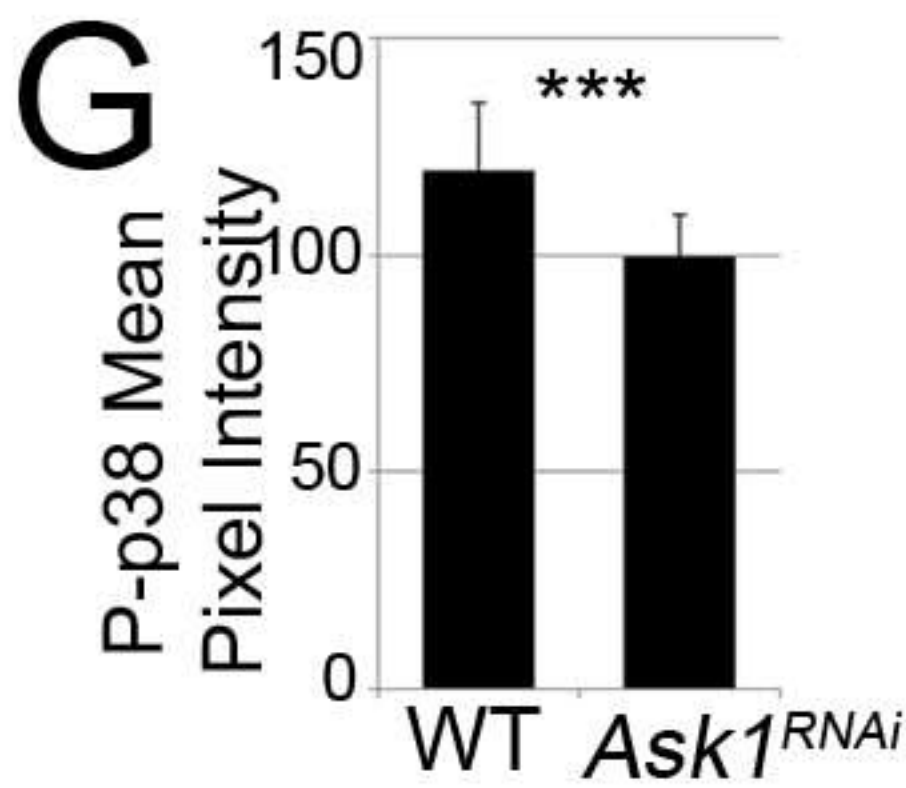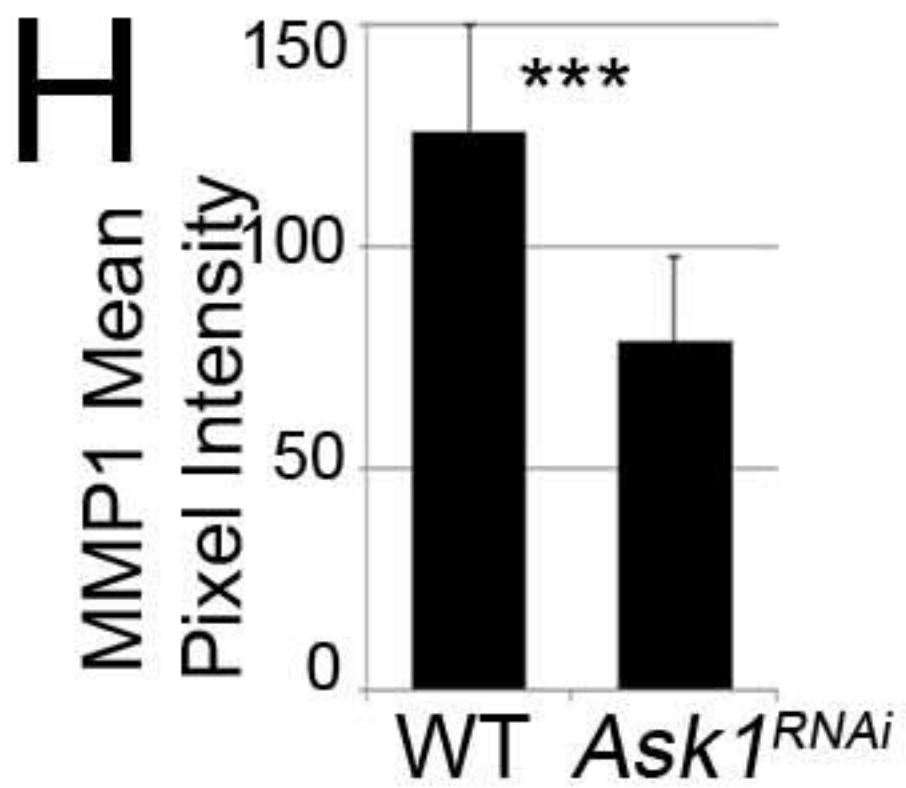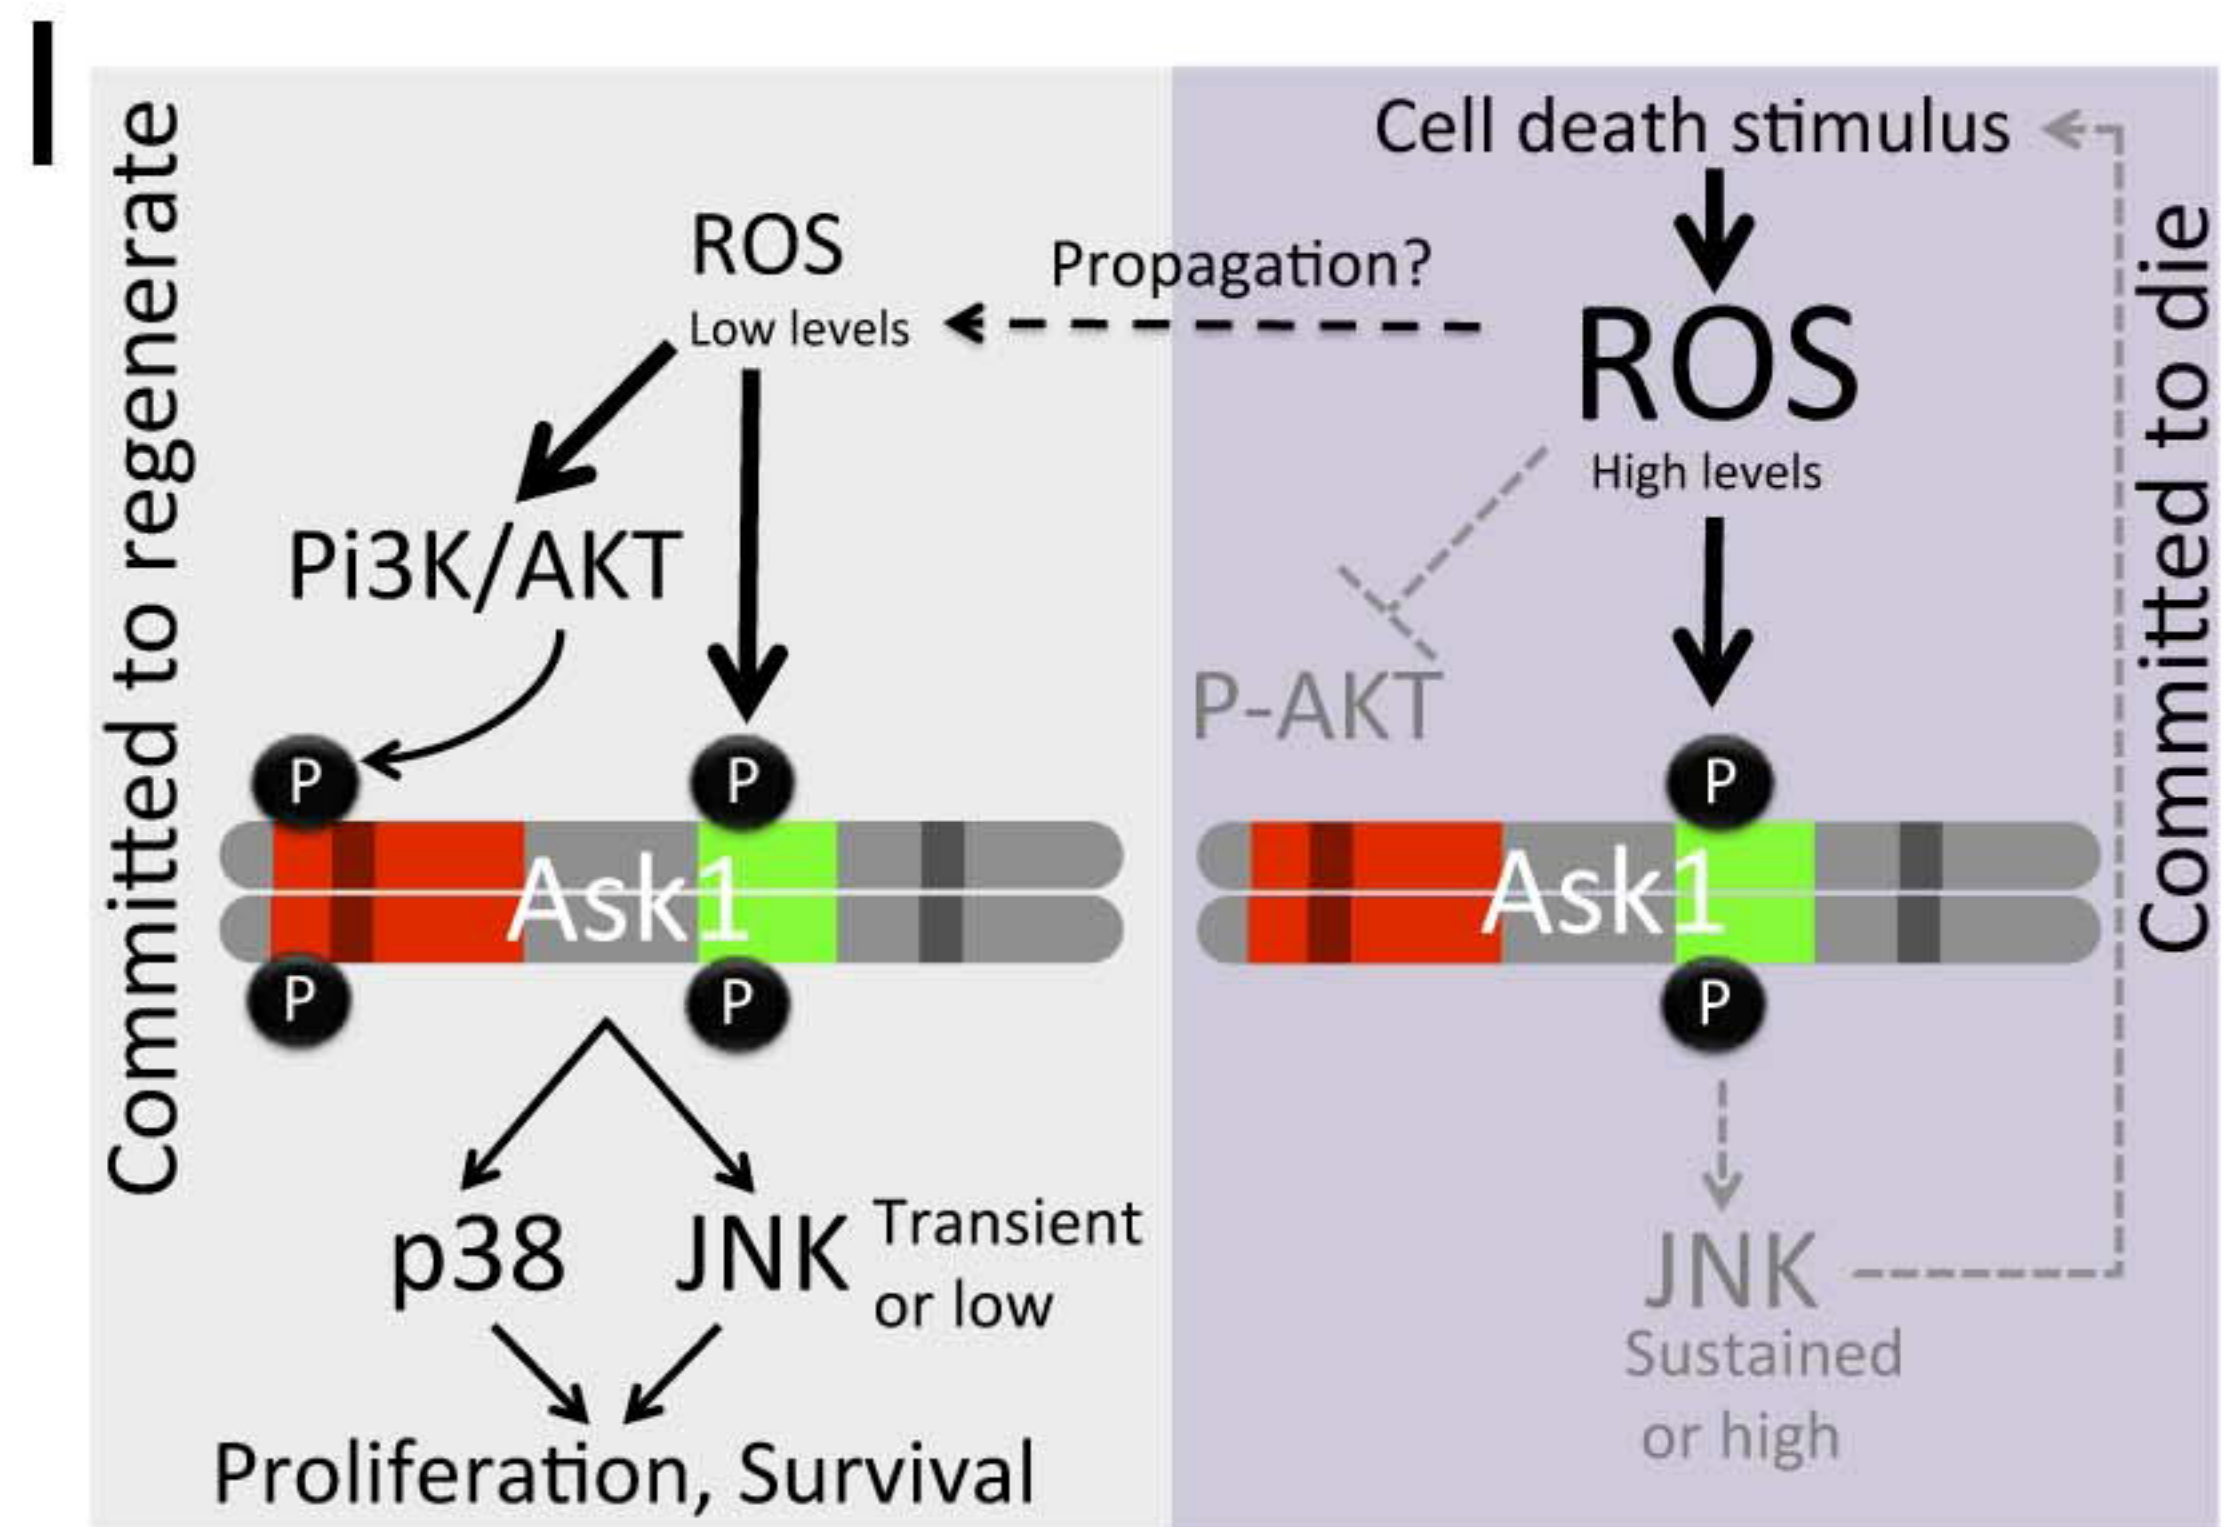

Source: https://www.biorxiv.org/content/10.1101/451070v1.full.pdf
